# Supplementary material for: Impact of incremental versus conventional initiation of haemodialysis on residual kidney function: study protocol for a multicentre feasibility randomised controlled trial
Source: PubMed Central journal article supplement — BMJ Open. 2020 Aug 13;10(8):e035919. doi: 10.1136/bmjopen-2019-035919 (PMC7430462; doi:10.1136/bmjopen-2019-035919), 2020-08-13
Supplement: bmjopen-2019-035919.draft_revisions.pdf [file bmjopen-2019-035919.draft_revisions.pdf]

# BMJ Open

BMJ Open is committed to open peer review. As part of this commitment we make the peer review history of every article we publish publicly available.

When an article is published we post the peer reviewers' comments and the authors' responses online. We also post the versions of the paper that were used during peer review. These are the versions that the peer review comments apply to.

The versions of the paper that follow are the versions that were submitted during the peer review process. They are not the versions of record or the final published versions. They should not be cited or distributed as the published version of this manuscript.

BMJ Open is an open access journal and the full, final, typeset and author-corrected version of record of the manuscript is available on our site with no access controls, subscription charges or pay-per-view fees (<http://bmjopen.bmj.com>).

If you have any questions on BMJ Open's open peer review process please email [info.bmjopen@bmj.com](mailto:info.bmjopen@bmj.com)

# BMJ Open

## Impact of Incremental versus Conventional Initiation of Haemodialysis on Residual Kidney Function: Study protocol for a multicentre feasibility randomised controlled trial.

|                               |                                                                                                                                                                                                                                                                                                                                                                                                                                                                                                                                                                                                                                                                              |
|-------------------------------|------------------------------------------------------------------------------------------------------------------------------------------------------------------------------------------------------------------------------------------------------------------------------------------------------------------------------------------------------------------------------------------------------------------------------------------------------------------------------------------------------------------------------------------------------------------------------------------------------------------------------------------------------------------------------|
| Journal:                      | <i>BMJ Open</i>                                                                                                                                                                                                                                                                                                                                                                                                                                                                                                                                                                                                                                                              |
| Manuscript ID                 | bmjopen-2019-035919                                                                                                                                                                                                                                                                                                                                                                                                                                                                                                                                                                                                                                                          |
| Article Type:                 | Protocol                                                                                                                                                                                                                                                                                                                                                                                                                                                                                                                                                                                                                                                                     |
| Date Submitted by the Author: | 21-Nov-2019                                                                                                                                                                                                                                                                                                                                                                                                                                                                                                                                                                                                                                                                  |
| Complete List of Authors:     | KAJA KAMAL, RAJA MOHAMMED; East and North Hertfordshire NHS Trust, Renal Unit; University of Hertfordshire<br>Farrington, Ken; East and North Hertfordshire NHS Trust, Renal Unit; University of Hertfordshire<br>Wellsted, David; University of Hertfordshire<br>Sridharan , Sivakumar; East and North Hertfordshire NHS Trust, Renal Unit; University of Hertfordshire<br>Alchi, Bassam; Royal Berkshire NHS Foundation Trust, Renal Unit<br>Burton, James; University Hospitals of Leicester NHS Trust, Renal Unit<br>Davenport, Andrew; Royal Free Hospital, Renal Unit<br>Vilar, Enric; East and North Hertfordshire NHS Trust, Renal Unit; University of Hertfordshire |
| Keywords:                     | Adult nephrology < NEPHROLOGY, Dialysis < NEPHROLOGY, End stage renal failure < NEPHROLOGY                                                                                                                                                                                                                                                                                                                                                                                                                                                                                                                                                                                   |
|                               |                                                                                                                                                                                                                                                                                                                                                                                                                                                                                                                                                                                                                                                                              |

SCHOLARONE™  
Manuscripts

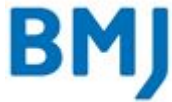

I, the Submitting Author has the right to grant and does grant on behalf of all authors of the Work (as defined in the below author licence), an exclusive licence and/or a non-exclusive licence for contributions from authors who are: i) UK Crown employees; ii) where BMJ has agreed a CC-BY licence shall apply, and/or iii) in accordance with the terms applicable for US Federal Government officers or employees acting as part of their official duties; on a worldwide, perpetual, irrevocable, royalty-free basis to BMJ Publishing Group Ltd ("BMJ") its licensees and where the relevant Journal is co-owned by BMJ to the co-owners of the Journal, to publish the Work in this journal and any other BMJ products and to exploit all rights, as set out in our [licence](#).

The Submitting Author accepts and understands that any supply made under these terms is made by BMJ to the Submitting Author unless you are acting as an employee on behalf of your employer or a postgraduate student of an affiliated institution which is paying any applicable article publishing charge ("APC") for Open Access articles. Where the Submitting Author wishes to make the Work available on an Open Access basis (and intends to pay the relevant APC), the terms of reuse of such Open Access shall be governed by a Creative Commons licence – details of these licences and which [Creative Commons](#) licence will apply to this Work are set out in our licence referred to above.

Other than as permitted in any relevant BMJ Author's Self Archiving Policies, I confirm this Work has not been accepted for publication elsewhere, is not being considered for publication elsewhere and does not duplicate material already published. I confirm all authors consent to publication of this Work and authorise the granting of this licence.

**TITLE:**

Impact of Incremental versus Conventional Initiation of Haemodialysis on Residual Kidney Function: Study protocol for a multicentre feasibility randomised controlled trial.

**Author:**

Kaja Kamal RM<sup>1,2</sup>, Farrington K<sup>1,2</sup>, Wellsted D<sup>2</sup>, Sridharan S<sup>1,2</sup>, Alchi B<sup>3</sup>, Burton J<sup>4</sup>, Davenport A<sup>3</sup>, Vilar E<sup>1,2</sup>

**Institution:** <sup>1</sup>Renal Unit, Lister Hospital, East and North Hertfordshire NHS Trust, UK.

<sup>2</sup>University of Hertfordshire, Hatfield, UK.

<sup>3</sup>Royal Berkshire Hospital NHS Trust, UK

<sup>4</sup>University Hospitals of Leicester NHS Trust, UK

<sup>5</sup>Royal Free London NHS Foundation Trust, UK.

**Corresponding author**

Dr Enric Vilar

Email [enric.vilar@nhs.net](mailto:enric.vilar@nhs.net)

Renal Unit, Lister Hospital, East and North Herts NHS Trust, Hertfordshire, SG1 4AB, UK

Word count 3151

## ABSTRACT

### Introduction

Preserving Residual Kidney Function (RKF) may be beneficial to patients on haemodialysis (HD) and it has been proposed that commencing dialysis incrementally rather than three times a week may preserve RKF. In Incremental HD, target dose includes a contribution from RKF, which is added to HD dose, thus allowing individualisation of the HD prescription. We plan to conduct a feasibility randomised controlled trial (RCT) comparing incremental HD and conventional three times weekly treatments in incident HD patients. The study is designed also to provide pilot data to allow determination of effect size to power a definitive study.

### Methods and Analysis

After screening to ensure native renal urea clearance  $>3\text{ml}/\text{min}/1.73\text{m}^2$ , the study will randomise 56 patients within 3 months of HD initiation to either conventional in-centre thrice weekly dialysis or incremental in-centre HD commencing two days a week. Subjects will be followed up for 12 months. The study will be carried out across 4 UK renal centres.

The primary outcome is to evaluate the feasibility of conducting a definitive RCT and to estimate the difference in rate of decline of RKF between the two groups at 6 and 12-month time points. Secondary outcomes will include the impact of dialysis intensity on vascular access events, major adverse cardiac events (MACE) and survival. The impact of dialysis intensity on patient reported outcomes measures, cognition and frailty will be assessed using EQ-5D-5L, PHQ-9, Illness intrusiveness rating score (IIRS), Montreal Cognitive assessment (MoCA), and Clinical Frailty Score (CFS).

The outcome of this study will be used to inform the design of a definitive study, adequately powered to determine whether RKF is better preserved after incremental HD initiation compared to initiation using conventional thrice weekly treatments.

### Ethics and dissemination

Ethics approval has been granted by East of England – Cambridge South Research Ethics Committee, United Kingdom (REC17/EE/0311). Results will be disseminated via peer-reviewed publication.

**Trial registration number** NCT03418181

Key words: 3 -10 keywords

Residual Kidney Function -End stage renal disease – HD - RCT – Randomised Controlled Trial

**Strengths and limitations of this study**

- No existing published prospective studies comparing incremental HD and conventional three times weekly treatments in incident HD patients and this study will aim to address this gap.
- The study will provide pilot data to allow determination of effect size to power a definitive study.
- Impact and intrusiveness of dialysis intensity being compared between study groups.
- Study size will not permit to determine the rate of decline of RKF in incremental groups.

For peer review only

## Background

Most end stage renal failure (ESRF) patients have a degree of native kidney function (Residual Kidney Function, RKF) remaining when they initiate HD. There has been recent interest in incremental HD, a method of individualising HD according to the level of RKF to permit dialysis to be commenced at a lower intensity than conventional approaches allow. Most patients commence dialysis using conventional three times weekly dialysis with RKF usually not accounted for in prescribing dialysis dose. In Incremental HD, RKF is combined with dialysis clearance to provide an overall measure of solute removal allowing the dose provided by dialysis to be individualised. Various algorithms are available to assist with this such as Standard Kt/V (Std Kt/V) which includes contributions from both Std Kt/V<sub>RKF</sub> and Std Kt/V<sub>dialysis</sub> [1-3]. In this approach, reduction of dialysis dose may be considered provided that the combined urea clearance targets are met and other markers of dialysis adequacy such as blood pressure, inter-dialytic weight gains, anaemia, potassium, phosphate control, nutrition and general well-being are not compromised. The technique requires that the proportion of target dose provided by dialysis is increased as the RKF declines or if there are any other indicators for inadequate dialysis. The dialysis team and patients need to be aware of the importance of regular measurement of RKF 1 to 3 monthly [4]. This incremental approach may not be suitable for patients who are unable or unwilling to collect urine samples.

Traditionally RKF has been incorporated into peritoneal dialysis dosing but it has not been included in calculating HD dose due to limited practical experiences and outcome data from clinical studies. There are no RCTs that compare clinical outcomes of incremental HD and those of conventional thrice-weekly HD. A number of observational studies have compared clinical outcomes of twice-weekly HD and conventional thrice-weekly HD regimens [5-19]. These studies suggest that the mortality risks and survival outcomes are not inferior in those on the twice weekly dialysis regime compared and those treated conventionally, provided there is adequate RKF. Importantly, several non-randomised studies have suggested that RKF is better preserved in those dialysed twice weekly commencing soon after dialysis initiation [6,10, 11, 17, 18]. Preservation of RKF may provide clinical benefits to HD patients including

1  
2  
3 better fluid control, significant solute and fluid removal. It is also associated with improved  
4 quality of life and survival.  
5  
6  
7

8  
9 These findings indicate the need for a prospective RCT comparing RKF preservation following  
10 incremental and conventional initiation of dialysis. We are undertaking a study to determine  
11 the feasibility of conducting such a study. Our study will also provide pilot data to estimate  
12 differences in the rate of decline of RKF in the first year after commencing dialysis using either  
13 conventional or incremental approaches. The primary outcome of our study is to evaluate the  
14 feasibility of conducting a RCT in patients who have recently started HD. Patients will be  
15 randomised either to an incremental arm initiating with twice weekly dialysis or to a  
16 conventional three times weekly dialysis. Our study will explore key methodological, design,  
17 and safety issues, and also estimate an effect size. These findings will facilitate the design of  
18 a subsequent definitive study.  
19  
20  
21  
22  
23  
24  
25  
26  
27  
28

## 29 **Methods/Design**

### 30 **Funding and governance**

31  
32 The study is funded by the British Kidney Patient Association & British Renal Society Joint  
33 Grants Programme. The study received ethical approval from East of England – Cambridge  
34 South (REC reference 17/EE/0311; IRAS project ID 219032). The trial is sponsored by East and  
35 North Hertfordshire NHS Trust. The University of Hertfordshire Clinical Trial Support Network  
36 (CTSN) will provide independent support for randomisation and monitoring of the study. The  
37 conduct of the trial will be overseen by a Steering group which will meet regularly and will  
38 include an independent Chair and co-applicants. The CTSN will monitor compliance with the  
39 study protocol at 3 months following study initiation and then as required by sponsor scrutiny  
40 of data returns.  
41  
42  
43  
44  
45  
46  
47  
48  
49  
50

### 51 **Setting**

52 The study will take place in four NHS Trust renal units – East and North Hertfordshire, Royal  
53 Free Hospitals, Royal Berkshire Hospitals and University Hospitals of Leicester. The total  
54 number of participants from all centres will be 56. Recruitment commenced in January 2018  
55 and completion of follow up will be in May 2020.  
56  
57  
58  
59  
60



## Study Objectives and End Points:

The study's primary objective is to determine the feasibility of conducting a definitive RCT of incremental HD initiation, compared with conventional thrice weekly in-centre HD initiation. There are a number of aspects to this primary objective which are summarised in Table 1. We will determine ease of recruitment (recruitability) and retention in the study (retainability), as well as fidelity to the protocol (protocol adherence) of patients in the study. The study will establish evidence for the safety of the incremental approach. It will also generate data allowing estimation of the effect size of the difference in rate of decline of RKF in the 6 months following randomisation between incremental and conventional HD arms.

Secondary objectives of the study are to determine whether there is a signal of benefit for incremental HD initiation for improving Quality of Life, mood, cognitive function, illness intrusiveness, functional status, frailty, risk of vascular access failure or interventions, major adverse cardiac events and survival. Specific tools used and methods to measure secondary outcomes related to these secondary objectives are detailed in Table 1. Illness intrusiveness will be measured with the Illness Intrusiveness Rating Scale, a validated tool to measure impact of the dialysis treatment and disease on physiologically meaningful activity and its psychosocial impact[20]. Quality of Life will be measured using EQ-5D-5L, a validated tool which will capture different dimensions of quality of life including anxiety/depression and pain/discomfort and can be used in health-economic evaluation[21]. Cognitive function will be measured using the Montreal Cognitive Assessment (MoCA) which is a tool for assessment of cognitive function that has been validated in dialysis patients against detailed neurophysiological testing covering different domains of cognitive function and provides good sensitivity and specificity for identifying cognitive impairment in this population [22, 23]. Clinical frailty will be measured using the Clinical Frailty Score[24, 25].

## Participants

Subjects meeting the inclusion criteria and not meeting the exclusion criteria will be eligible for screening and will be invited to participate in the study and asked to provide written informed consent prior to study screening. Eligibility criteria include having an inter-dialytic urea clearance  $\geq 3\text{ml/min/1.73m}^2$  BSA to ensure that only patients who are safe to potentially

1  
2  
3 randomise to incremental HD are consented. Where this is not available as part of routine  
4 care a pre-screening sample will be required.  
5  
6  
7

## 8 9 Consent

10 Consent will be required prior to screening procedures and will include agreement to  
11 screening which includes confirmation of urea clearance  $\geq 3\text{ml/min/1.73m}^2$  BSA and an  
12 explicit consent to a protocol-driven dialysis regime and to randomisation to incremental HD  
13 or standard thrice weekly HD arms.  
14  
15  
16  
17

## 18 19 Inclusion Criteria:

- 20  
21  
22
- 23 • Age  $\geq 18$  years.
  - 24 • Advanced kidney failure - established as a new starter on HD within the previous 3  
25 months.
  - 26 • RKF likely to permit twice weekly dialysis as defined by inter-dialytic urea clearance  
27  $\geq 3\text{ml/min/1.73m}^2$  BSA measured routinely as part of standard care or as pre-  
28 screening.
  - 29 • Sufficient understanding of the study procedures and requirements including capacity  
30 for explicit agreement to be randomised to standard or incremental HD regimens.  
31  
32  
33  
34  
35  
36  
37  
38

## 39 Exclusion Criteria:

- 40  
41
- 42 • Planned organ transplantation within 3 months from study screening.
  - 43 • Anticipated requirement for high-volume ultrafiltration on dialysis (e.g. subjects with  
44 daily enteral or parenteral nutrition)
  - 45 • Blood-borne virus positivity.
  - 46 • Subjects unable to comply with requirement for monthly inter-dialytic urine  
47 collection.
  - 48 • Pregnancy.
  - 49 • Prognosis  $<12$  months as judged by the Principal Investigator.  
50  
51  
52  
53  
54  
55  
56  
57  
58  
59  
60

## Screening phase

At screening inclusion and exclusion criteria will be confirmed. Confirmation of inter-dialytic urea clearance  $\geq 3\text{ml/min/1.73m}^2$  BSA will be performed. Pregnancy test will be performed in females of child-bearing age. Patients who, at screening, are eligible for study participation according to eligibility criteria, and who are confirmed to have a screening inter-dialytic urea clearance  $\geq 3\text{ml/min/1.73m}^2$  BSA will be eligible for randomisation. Subjects who fail screening will be eligible for re-screening one month later provided their screening urea clearance is  $> 2\text{ml/min/1.73m}^2$  BSA and the rescreening time point remains within 3 months of dialysis initiation. At re-screening, a urea clearance  $\geq 3\text{ml/min/1.73m}^2$  BSA will be required for randomisation into the study.

## Randomisation

Web-based randomisation will be carried out by each centre using Qualtrics, supported by the Clinical Trials Support Network, University of Hertfordshire. Subjects will be randomised on a 1:1 basis to each study arm and each subject allocated a unique study ID.

## Study phase

Following randomisation, study subjects will be dialysed according to the protocol of their randomisation arm as per the schematic in Figure 1. Monthly quality assessment of dialysis in both arms will include a measure of dialysis clearance ( $\text{Std Kt/V}_{\text{Dialysis}}$ ). RKF will be measured monthly by urea clearance in both arms and converted to  $\text{Std Kt/V}_{\text{RKF}}$ .

In the standard dialysis arm, dialysis adequacy will be assessed only using the  $\text{Std Kt/V}_{\text{Dialysis}}$ . In the incremental dialysis arm, the adequacy will be assessed using a composite of dialysis clearance ( $\text{Std Kt/V}_{\text{Dialysis}}$ ) and RKF ( $\text{Std Kt/V}_{\text{RKF}}$ ) as detailed below. This composite is termed  $\text{Std Kt/V}_{\text{Dialysis+RKF}}$ .

HD modes will remain standard throughout the study. Haemodiafiltration may be used where blood flow  $> 250\text{ ml/min}$ , otherwise high-flux HD will be used.

## Groups

### Control Group: Standard HD arm

Subjects in the standard HD arm will be dialysed to target minimum Std Kt/V<sub>Dialysis</sub> of 2 per week. Subjects will be dialysed after randomisation initially for 3.5-4 hours thrice weekly. Dialysis dose will be adjusted using standard measures including maximising blood flow, dialysis time, membrane surface area and improving vascular access. Reduction in dialysis frequency will not be permitted.

### Interventional Group: Incremental HD arm

Subjects randomised to the incremental HD arm will be dialysed to a target minimum Std Kt/V<sub>Total</sub> (Std Kt/V<sub>dialysis</sub> + Std Kt/V<sub>RRF</sub>) of 2 per week. Following randomisation dialysis will be initiated twice weekly, with a session duration of 3.5-4 hours. If Std Kt/V<sub>Total</sub> exceeds the minimum target, clinicians will be permitted to reduce dialysis times provided the target level is still achieved. If Std Kt/V<sub>Total</sub> does not meet the target, clinicians will be permitted to increase dialysis dose by optimising dialysis clearance (membrane selection, blood flow, vascular access, increasing dialysis time or frequency). Clinicians will be permitted to increase HD to thrice weekly or greater if required, and also to reduce frequency for these subjects should Std Kt/V<sub>Total</sub> improve enough to allow target achievement. Subjects whose dialysis frequency is increased to thrice weekly or more will remain in the incremental HD arm.

### Deviations to study protocol

If subjects are admitted to hospital, efforts will be made to adhere to the dialysis protocol. However, during admissions, modifications to the dialysis prescription, which include increasing dialysis frequency, are permitted in the interests of patient safety. These will be recorded as protocol deviations.

In the event of subjects in the incremental HD arm not providing inter-dialytic urine samples for calculation of Standard Kt/V<sub>Renal</sub> for two consecutive months, the subject will be advised to dialyse thrice weekly and will remain in the study with target Standard Kt/V<sub>Dialysis</sub> >2 (i.e. assuming RRF is zero), until an inter-dialytic urine collection is provided. Additional study visits

1  
2  
3 may be performed if necessary following hospital admission, holiday or non-adherence to  
4 treatment schedule.  
5  
6  
7

## 8 Procedures to avoid loss from follow up or study withdrawal

9  
10 The patient information sheet and consent form will draw attention to the requirement for  
11 patients to agree that their dialysis regime and frequency will be adjusted according to the  
12 study protocol.  
13  
14  
15

16  
17  
18 For patients wishing to withdraw consent, the investigator will explore with the patient the  
19 reasons for wishing to withdraw. In patients who wish to withdraw because they are unable  
20 to tolerate the intensity, frequency or duration of dialysis, the investigator will be permitted  
21 to offer to the patient to remain in the study with reduced dialysis intensity according to  
22 clinical judgement and record this as a protocol deviation (intention-to-treat approach).  
23 Patients who withdraw will be encouraged to remain in the study for the purpose of outcome  
24 data collection including measurement of RKF.  
25  
26  
27  
28  
29  
30  
31

## 32 Data Collection

33  
34 Data will be collected by the research team members at baseline and then monthly thereafter  
35 for 12 months. Table 2 summarises study assessments during the study and study time points.  
36  
37  
38  
39

## 40 Measurement of dialysis adequacy

41  
42 Details of the method of measuring dialysis adequacy are provided in supplementary  
43 materials. The dialysis dosing adjustment will be carried out monthly using Std Kt/V calculated  
44 by this method.  
45  
46  
47  
48  
49

## 50 Sample size

51  
52 Retrospective studies suggest that decline of RKF may be attenuated in patients who receive  
53 twice weekly dialysis compared to thrice weekly, and that this effect occurs early such that a  
54 difference in RKF at 6 months is likely to be an optimal time point for the basis of a power  
55 analysis. Our initial power analysis, based on our own retrospective data[26], indicated an  
56 effect size (Cohen's d) of 0.37 calculated from mean and standard deviations of urea clearance  
57  
58  
59  
60

1  
2  
3 slopes in the first 6 months after HD initiation between two groups of patients, one initiating  
4 HD twice weekly and the other thrice weekly. Based on this, sample size for the proposed  
5 definitive RCT of 180 (90 each arm). A more accurate estimate for separation of RKF at 6  
6 months between groups is desirable for the power analysis of a future prospective RCT.  
7  
8  
9

10  
11  
12 Cocks and Torgerson [27] suggest a method to calculate the sample size for a pilot study from  
13 the estimated total sample size. Using this method, we find a required sample size of n=10  
14 per arm to estimate mean and standard deviation of RKF at 6 months. However, Cocks and  
15 Torgerson advise a minimum sample size n=20 per arm. Allowing for 20% drop out at 6  
16 months and 30% at 12 months an uplifted sample size of n=25 per arm at 6 months and n=18  
17 per arm at 12 months requires randomisation of 50 subjects. During the initial few months of  
18 the study there were more patients than expected recovering dialysis independence so the  
19 sample size was increased to 56 to account for this. This is a feasibility study and a statistically  
20 significant difference in RKF decline between study groups is not expected. However, we  
21 anticipate that the sample size will be sufficient to provide an estimate of effect size.  
22  
23  
24  
25  
26  
27  
28  
29  
30

### 31 32 Adverse events (AE) AND Serious Adverse Events (SAE)

33 All AE will be recorded in an AE log. SAEs will be reported to the CI and sponsors within 24 h  
34 of the research team becoming aware of the event. For the purpose of this study, SAE which  
35 result in death, hospitalisation, MACE, infections requiring antibiotic use, episodes of fluid  
36 overload needing resetting of dry weight, episodes of hyperkalemia (potassium level > 6.5  
37 mmol/L), vascular access events (tunnelled line failures, tunnelled line infections, fistula  
38 thrombosis, fistula stenosis, false aneurysm) will be captured.  
39  
40  
41  
42  
43  
44  
45  
46  
47

### 48 Data Analysis

49 The primary outcome is to evaluate the feasibility of conducting an RCT comparing the effect,  
50 on RKF decline, of incremental and conventional approaches to HD initiation. The study will  
51 be analysed as intention-to-treat. In order to estimate the study power for a future large scale  
52 RCT, estimates of change in RKF in the first 6 and 12 months after dialysis initiation will be  
53 determined.  
54  
55  
56  
57  
58  
59  
60

1  
2  
3 Change in RKF will be determined using several methods. We will calculate, using regression  
4 analysis for individual subjects, rate of decline in GFR (mean of urea and creatinine clearance)  
5 for individual subjects and compare means between incremental and conventional HD  
6 groups. This effect size will be important in powering future definitive trials. In addition, we  
7 will estimate RKF (GFR) from monthly measured pre-dialysis middle molecule concentrations  
8 of  $\beta$  trace protein and  $\beta$ 2-microglobulin converted to an equivalent GFR using the algorithm  
9 reported by Wong et al[28]. We will calculate rate of decline in GFR for individual patients  
10 from these middle molecule concentrations and using regression analysis for individual  
11 patient data to determine GFR slope and will compare mean slope between incremental HD  
12 and standard care groups.  
13  
14  
15  
16  
17  
18  
19  
20  
21  
22

23 Data from the EQ-5D-5L, PHQ-9, MoCA, IIRS and CFS will be compared between study arms  
24 with repeated measures parametric or non-parametric tests as appropriate (repeated  
25 measures ANOVA or Friedman tests). Comparison of MACE, vascular access events (access  
26 failure, access intervention, access related infections, fistula stenosis and fistula thrombosis),  
27 hyperkalaemic episodes, fluid overload episodes and lower respiratory tract infection  
28 episodes will be compared between groups using time-to-event analysis by the Nelson-Aalen  
29 approach.  
30  
31  
32  
33  
34  
35  
36  
37  
38  
39

## 40 Discussion

41 Clinical practise guidelines for HD adequacy, update 2006 [29] suggests that reduction of  
42 treatment frequency to less than thrice-weekly should only be considered in patients with  
43 inter-dialytic urea clearance  $>2\text{ml}/\text{min}/1.73\text{m}^2$  since urea kinetic modelling simulations have  
44 shown that when residual urea clearance is less than this, it is not possible to achieve a weekly  
45 standard Kt/V of 2.0 with twice-weekly dialysis regimes. Hence in this study we have opted  
46 for a required inter-dialytic urea clearance (RKF) of  $\geq 3\text{ml}/\text{min}/1.73\text{m}^2$  BSA prior to  
47 randomisation as an inclusion criterion to provide a safety margin.  
48  
49  
50  
51  
52  
53  
54

55 There are a large number of observational studies [5-18] that compare clinical outcomes of  
56 patients treated with twice-weekly HD with those on conventional thrice-weekly HD regimes  
57 but to date no RCT that compare clinical outcomes of incremental or infrequent HD versus  
58  
59  
60

1  
2  
3 conventional thrice-weekly HD have been published. There are suggestions from  
4 observational studies that the rate of decline of RKF is slower using infrequent and  
5 incremental HD regimes but there is no prospective, randomised data. Hence it is unclear to  
6 what extent the benefits of incremental and infrequent HD are due to patient selection.  
7 Similarly, there are no comparative data on Quality of Life measures or on patient experience  
8 in conventional versus incremental HD. Mortality risk and survival outcomes have not been  
9 reported to be worse in patients treated with twice-weekly dialysis sessions [9, 13, 16] and a  
10 large US study found that mortality risk was lower in prevalent patients treated with twice-  
11 weekly HD, provide there was adequate RKF [5]. Hence there is a need for a definitive trial of  
12 incremental versus conventional dialysis initiation to define the effects on RKF preservation  
13 and patient-reported outcome and experience.  
14  
15  
16  
17  
18  
19  
20  
21  
22  
23  
24

25 The outcome data of this current study will be used to inform the design of such a future  
26 definitive study. It is likely that the outcomes of a definitive study will be important, not only  
27 in defining the potential benefit of incremental HD for patients, but in establishing whether  
28 such an approach may allow optimization of resource use. If dialysis intensity can be reduced  
29 for patients with sufficient RKF with patient benefit, this will liberate dialysis resources that  
30 may permit other patients with high dialysis requirements to dialyse more frequently.  
31  
32  
33  
34  
35  
36  
37

### 38 **Competing interests**

39 The authors declare that they have no competing interests. This report is independent research  
40 funded by BRS and BPKA. The views expressed in this publication are those of the authors.  
41  
42

### 43 **Author's contributions**

44 Design of the study and the development of the protocol: EV, RMKK, KF, SS  
45 Trial set up and running of the study, trial governance, data integrity monitoring: EV, DW  
46 Data analysis: EV, RMKK, KF, DW  
47 Principal Investigators: EV, JB, AD, BA  
48 All authors are involved in the steering group of the study and in the analysis and interpretation of  
49 the data.  
50 All authors read and approved the final manuscript.  
51  
52  
53  
54  
55  
56  
57  
58  
59  
60



## Abbreviations

**AEs:** Adverse Events

**CFS:** Clinical Frailty Score

**CI:** Chief Investigator

**CRFs:** Case Report Forms

**EQ-5D-5L:** EuroQol - 5D-5L

**ESRD:** End Stage Renal Disease

**HD:** Haemodialysis

**IIRS:** Illness Intrusiveness Rating Scale

**Kt/V:** Urea Clearance normalised to total body water

**MACE:** Major Adverse Cardiac Events

**MoCA:** Montreal Cognitive Assessment

**PHQ-9:** Patient Health Questionnaire 9

**PI:** Principal Investigator

**RCT:** Randomised Controlled Trial

**RKF:** Residual Kidney Function

**SAEs:** Serious Adverse Events

**SUSAR:** Suspected Unexpected Serious Adverse Reaction

## REFERENCES

1. Kalantar-Zadeh, K., et al., *Twice-weekly and incremental hemodialysis treatment for initiation of kidney replacement therapy*. Am J Kidney Dis, 2014. **64**(2): p. 181-6.
2. Davenport, A., *Will incremental hemodialysis preserve residual function and improve patient survival?* Semin Dial, 2015. **28**(1): p. 16-9.
3. Wong, J., et al., *Incremental haemodialysis*. Nephrol Dial Transplant, 2015. **30**(10): p. 1639-48.
4. Gilmore, J., *KDOQI clinical practice guidelines and clinical practice recommendations--2006 updates*. Nephrol Nurs J, 2006. **33**(5): p. 487-8.
5. Hanson, J.A., et al., *Prescription of twice-weekly hemodialysis in the USA*. Am J Nephrol, 1999. **19**(6): p. 625-33.
6. Lin, Y.F., et al., *Comparison of residual renal function in patients undergoing twice-weekly versus three-times-weekly haemodialysis*. Nephrology (Carlton), 2009. **14**(1): p. 59-64.
7. Vilar, E., et al., *Residual renal function improves outcome in incremental haemodialysis despite reduced dialysis dose*. Nephrol Dial Transplant, 2009. **24**(8): p. 2502-10.
8. Supasyndh, O., et al., *Nutritional status of twice and thrice-weekly hemodialysis patients with weekly Kt/V > 3.6*. J Med Assoc Thai, 2009. **92**(5): p. 624-31.
9. Lin, X., et al., *Clinical outcome of twice-weekly hemodialysis patients in shanghai*. Blood Purif, 2012. **33**(1-3): p. 66-72.
10. Milagros Fernandez Lucas, J.L.T., Gloria Ruiz-Roso, Martha Diaz, Viviana Raoch, Fernando Caravaca, Carlos Quereda, *Incremental Hemodialysis Schedule in Patients with Higher Residual Renal Function at the Start of Dialysis*. Advances in Nephrology, 2014. **2014**: p. 6.
11. Zhang, M., et al., *Association of initial twice-weekly hemodialysis treatment with preservation of residual kidney function in ESRD patients*. Am J Nephrol, 2014. **40**(2): p. 140-50.
12. Bieber, B., et al., *Two-times weekly hemodialysis in China: frequency, associated patient and treatment characteristics and Quality of Life in the China Dialysis Outcomes and Practice Patterns study*. Nephrol Dial Transplant, 2014. **29**(9): p. 1770-7.
13. Elamin, S. and H. Abu-Aisha, *Reaching target hemoglobin level and having a functioning arteriovenous fistula significantly improve one year survival in twice weekly hemodialysis*. Arab J Nephrol Transplant, 2012. **5**(2): p. 81-6.
14. Cheng, Y., et al., *Risk of cardiovascular disease in patients on thrice-weekly versus twice-weekly hemodialysis*. Int J Cardiol, 2014. **174**(3): p. 780-3.
15. Lei, G., et al., *Risk of intradialytic hypotension in patients on thrice-weekly versus twice-weekly hemodialysis*. Int J Cardiol, 2014. **174**(3): p. 821-3.
16. Panaput, T., et al., *Dialysis dose and risk factors for death among ESRD patients treated with twice-weekly hemodialysis: a prospective cohort study*. Blood Purif, 2014. **38**(3-4): p. 253-62.
17. Obi, Y., et al., *Incremental Hemodialysis, Residual Kidney Function, and Mortality Risk in Incident Dialysis Patients: A Cohort Study*. Am J Kidney Dis, 2016. **68**(2): p. 256-265.
18. Caria, S., et al., *The incremental treatment of ESRD: a low-protein diet combined with weekly hemodialysis may be beneficial for selected patients*. BMC Nephrol, 2014. **15**: p. 172.
19. Fernandez-Lucas, M., et al., *Maintaining residual renal function in patients on haemodialysis: 5-year experience using a progressively increasing dialysis regimen*. Nefrologia, 2012. **32**(6): p. 767-76.
20. Devins, G.M., *Using the illness intrusiveness ratings scale to understand health-related quality of life in chronic disease*. J Psychosom Res, 2010. **68**(6): p. 591-602.
21. Herdman, M., et al., *Development and preliminary testing of the new five-level version of EQ-5D (EQ-5D-5L)*. Qual Life Res, 2011. **20**(10): p. 1727-36.
22. Nasreddine, Z.S., et al., *The Montreal Cognitive Assessment, MoCA: a brief screening tool for mild cognitive impairment*. J Am Geriatr Soc, 2005. **53**(4): p. 695-9.

- 1
- 2
- 3
- 4 23. Tiffin-Richards, F.E., et al., *The Montreal Cognitive Assessment (MoCA) - a sensitive screening*
- 5 *instrument for detecting cognitive impairment in chronic hemodialysis patients.* PLoS One,
- 6 2014. **9**(10): p. e106700.
- 7 24. Moorhouse, P. and K. Rockwood, *Frailty and its quantitative clinical evaluation.* J R Coll
- 8 Physicians Edinb, 2012. **42**(4): p. 333-40.
- 9 25. Alfaadhel, T.A., et al., *Frailty and mortality in dialysis: evaluation of a clinical frailty scale.* Clin
- 10 J Am Soc Nephrol, 2015. **10**(5): p. 832-40.
- 11 26. Raja Mohammed Kaja Kamal, H.C., Laura Mawer, Enric Vilar, Ken Farrington; SP464,
- 12 *INITIATING HAEMODIALYSIS TWICE WEEKLY MAY PROTECT NATIVE KIDNEY FUNCTION.*
- 13 Nephrology Dialysis Transplantation, 2017. **Volume 32**(Issue suppl\_3): p. Pages iii281.
- 14 27. Cocks, K. and D.J. Torgerson, *Sample size calculations for pilot randomized trials: a*
- 15 *confidence interval approach.* J Clin Epidemiol, 2013. **66**(2): p. 197-201.
- 16 28. Wong, J., et al., *Predicting residual kidney function in hemodialysis patients using serum*
- 17 *beta-trace protein and beta2-microglobulin.* Kidney Int, 2016. **89**(5): p. 1090-1098.
- 18 29. Hemodialysis Adequacy Work, G., *Clinical practice guidelines for hemodialysis adequacy,*
- 19 *update 2006.* Am J Kidney Dis, 2006. **48 Suppl 1**: p. S2-90.
- 20
- 21
- 22
- 23
- 24
- 25
- 26
- 27
- 28
- 29
- 30
- 31
- 32
- 33
- 34
- 35
- 36
- 37
- 38
- 39
- 40
- 41
- 42
- 43
- 44
- 45
- 46
- 47
- 48
- 49
- 50
- 51
- 52
- 53
- 54
- 55
- 56
- 57
- 58
- 59
- 60

Table 1: Study Objectives

| Primary Objective                                                                                                  | Primary Outcome                                                                                                                                                                                                                               |
|--------------------------------------------------------------------------------------------------------------------|-----------------------------------------------------------------------------------------------------------------------------------------------------------------------------------------------------------------------------------------------|
| The number of subjects agreeing to participate in the study – <b>Recruitability</b>                                | *Number of patients potentially eligible for screening during the study period at each study centre<br>*Proportion of screened patients who fulfil study criteria<br>*Proportion of patients approached who agree to participate in the study |
| The number of subjects who remain in the study – <b>Retainability</b>                                              | Proportion of patients randomised who withdraw from the study and the reasons for their withdrawal                                                                                                                                            |
| The proportion of subjects who adhere to protocol-driven changes in dialysis frequency - <b>Protocol adherence</b> | Proportion of patients who adhere to protocol dialysis frequency                                                                                                                                                                              |
| The number of adverse and serious adverse events - <b>Safety of the study</b>                                      | Frequency of hospital admission due to hyperkalemia and fluid overload, and lower respiratory tract infection (LRTI)                                                                                                                          |
| An estimate of the effectiveness of the intervention - <b>Effect size</b>                                          | *Dialysis dose and residual kidney function as measured by Std Kt/V<br>*Rate of change (mean) of RKF in the first 6 and 12 months after randomisation.                                                                                        |
| Secondary Objectives                                                                                               | Secondary Outcome                                                                                                                                                                                                                             |
| Quality of life (QOL)                                                                                              | QOL is assessed using EQ-5D-5L questionnaire                                                                                                                                                                                                  |
| Mood – Depression                                                                                                  | Depression assessed using PHQ-9 questionnaire.                                                                                                                                                                                                |
| Cognitive function                                                                                                 | Change in cognitive function as assessed by MOCA tool                                                                                                                                                                                         |
| Illness intrusiveness                                                                                              | Illness intrusiveness is assessed using Illness intrusiveness rating scale                                                                                                                                                                    |
| Functional status /Frailty                                                                                         | Functional status assessed by Clinical Frailty Score (CFS)                                                                                                                                                                                    |
| Vascular access failures or problems                                                                               | Frequency of vascular access failures and interventions                                                                                                                                                                                       |
| Major Adverse Cardiac Events (MACE)                                                                                | MACE is assessed by recording of the frequency of the events.                                                                                                                                                                                 |
| Survival                                                                                                           | Survival is measured by all-cause mortality                                                                                                                                                                                                   |

**Table 2: Schedule of Events**

|                                                                                                            | Study Period  |                        |            |
|------------------------------------------------------------------------------------------------------------|---------------|------------------------|------------|
|                                                                                                            | Pre-screening | Baseline/Screening     | Visit 1-12 |
| Months                                                                                                     | -12 to 0      | 0                      | 1-12       |
| <b>Study Procedures/Assessments</b>                                                                        |               |                        |            |
| Consent                                                                                                    |               | X                      |            |
| Inclusion/Exclusion Criteria                                                                               | X             | X                      |            |
| Demographics, Medical History, Physical examination, Height                                                |               | X                      |            |
| Randomisation                                                                                              |               | X                      |            |
| Rescreening*                                                                                               |               | X                      |            |
| Concomitant medications -Diuretics, Erythropoietin Stimulating Agents, Antihypertensive, Phosphate Binders |               | X                      | X          |
| Monthly dialysis blood tests                                                                               |               | X                      | X          |
| Monthly dialysis Adequacy assessments                                                                      |               | X                      | X          |
| Pre HD1 Urea, Post HD1 Urea, Pre HD2 Urea, Post HD2 Urea**                                                 | X             | X                      | X          |
| Inter-dialytic urine collection for Urea & Creatinine Clearance measurement                                |               | X                      | X          |
| Frozen samples for $\beta$ -2 Microglobulin & $\beta$ Trace Protein                                        |               | X                      | X          |
| Bioimpedance measurement                                                                                   |               | X                      | X          |
| <b>Safety Assessments</b>                                                                                  |               |                        |            |
| Adverse Events, Serious Adverse Events, MACE, End points                                                   |               |                        | X          |
| <b>Questionnaires</b>                                                                                      |               |                        |            |
| EQ-5D-5L, IIRS, PHQ9, MoCA, CFS                                                                            |               | <b>Months 0, 6, 12</b> |            |

\*Patients who fail screening will be eligible for re-screening one month later provided their screening urea clearance is  $>2\text{ml/min/1.73m}^2$  BSA and the rescreening time point remains within 3 months of HD initiation

\*\* Dialysis adequacy can be calculated using either PostHD1 Urea, PreHD2 Urea, PostHD2 Urea or optionally using PreHD1 Urea, PostHD1 Urea, PreHD2 Urea.

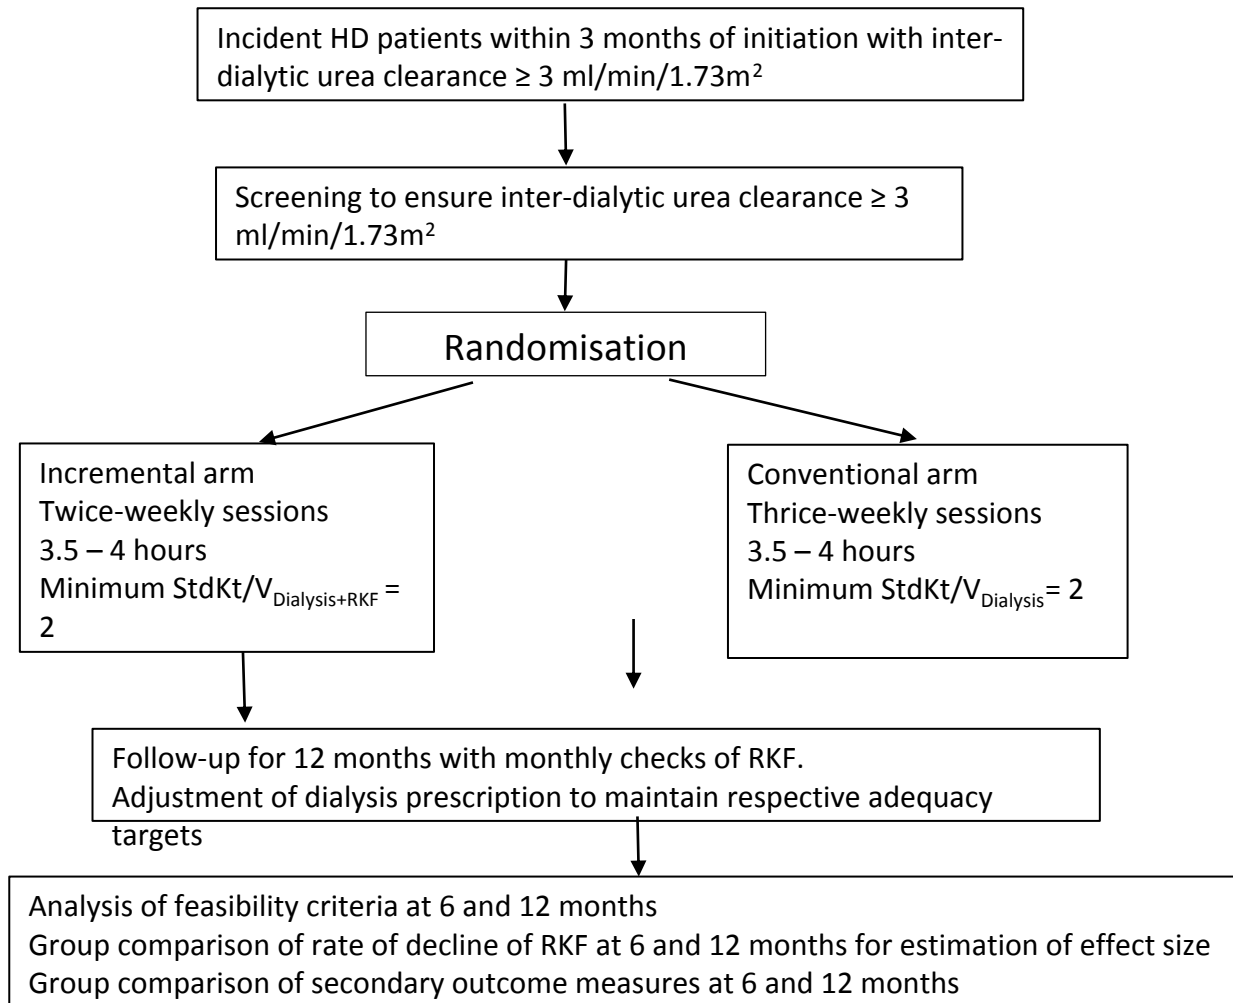

**CALCULATION PROCESS FOR DIALYSIS STANDARD Kt/V TAKING INTO ACCOUNT ULTRAFILTRATION  
WEIGHT (DAUGIRDAS METHODOLOGY)**

STEP 1: Calculate spKt/V not taking into account fluid removal

$$spKt/V = \ln \left( \frac{C_{pre}}{C_{post}} \right) \quad (\text{EQUATION 1})$$

Where  $C_{pre}$  is urea concentration pre-dialysis and  $C_{post}$  is urea concentration post dialysis

STEP 2: Calculate eKt/V not taking into account fluid removal using Tattersall transformation

In this calculation the Tattersall time constant is modified from 35 mins to 30.7mins as per modifications recommended by Daugirdas (Kidney International (2010) 77, 637–644)

$$eKt/V = spKt/V \text{ from step 1} * \frac{\left(\frac{T_d}{60}\right)}{(T_d \times 60 + 30.7)} \quad (\text{EQUATION 2})$$

Where  $T_d$  is dialysis duration expressed in hours

STEP 3: Calculate Adjusted Watson Volume

Watson V needs to be downsized by 10% to account for higher modelled V compared to anthropometric Watson V (Daugirdas Kidney International (2010) 77, 637–644).

Calculate Watson Volume by standard equation and downgrade by 10%

$$\text{Adjusted Watson V} = \text{Watson V} * 0.9 \quad (\text{EQUATION 3})$$

STEP 4: Calculate Leypoldt standard Kt/V

In this we employ eKt/V from equation 2. This equation for standard Kt/V does not account for UF volume. Leypoldt equation is as below (Leypoldt JK. Hemodial Int 2004; 8: 193–197. and Daugirdas Kidney International (2010) 77, 637–644):

$$\text{stdKt/V} = \frac{10,080 \frac{1 - e^{-eKt/V}}{t}}{\frac{1 - e^{-eKt/V}}{eKt/V} + \frac{10,080}{f t} - 1} \quad (\text{EQUATION 4})$$

Where  $f$ =frequency,  $t$ =dialysis time, eKt/V is results from **Equation 2**

STEP 5: Calculate Standard Kt/V taking into account UF weight using Daugirdas methodology:

$$stK_{dt}/V = S / (1 - (0.74/F) \cdot UFw/V) \quad (\text{EQUATION 5})$$

(equation 2 from Daugirdas et al, *Kidney International* (2010) 77, 637–644)

where S=StdKt/V from EQUATION 4, F=frequency (sessions/week), UFw=weekly fluid gain between HD sessions, V=adjusted Watson V from **Equation 3**

### **CALCULATION OF RESIDUAL RENAL FUNCTION STANDARD Kt/V**

STEP 1: Calculate Urea clearance

$$\text{Urea clearance} = \frac{\text{UrineVol} \times 1000 \times \text{UreaUrea}}{\frac{(\text{UrineDuration} \times 24 \times 60 - (\text{Td} \times 60))}{2} \times \frac{(\text{PostUrea} + \text{PreUrea})}{2}} \quad (\text{EQUATION 6})$$

Where urea clearance units are ml/min, UrineVol=urine volume (L), UrineUrea=urine urea concentration (mmol/L), UrineDuration=Urine collection duration (whole days between HD session), Td=dialysis duration (hours), PostUrea=Blood urea concentration at end of HD when urine collection starts (mmol/L), PreUrea= Blood urea concentration at start of HD when urine collection ends (mmol/L).

This equation assumes that dialysis is occurring at regular time points and utilises duration of urine collection as days between HD sessions minus dialysis duration.

Step 2: Calculate urea clearance corrected for body surface area (used for screening process of study but not for calculation of Std Kt/V which uses unadjusted urea clearance

BSA=Dubois BSA (m<sup>2</sup>)

$$\text{BSA} = 0.007184 * \text{Height in cm}^{0.725} * \text{Weight in Kg}^{0.425} \quad (\text{EQUATION 7})$$

$$\text{Urea clearance adjusted for BSA} = \text{Urea clearance} * 1.73 / \text{BSA} \quad (\text{EQUATION 8})$$

Step 3: Calculate Adjustment factor needed to downgrade urea clearance so it can be used to calculate Standard Kt/V

This method applies a multiplier to Urea Clearance to downgrade it so that it is appropriately incorporated into the Standard Kt/V calculation (fKru=approximately 0.7, or 70%)

$$fKru = \frac{0.974}{(spKt/V + 1.62) + 0.4} \quad (\text{EQUATION 9})$$



(from Daugirdas Kidney International (2010) 77, 637–644). SpKt/V is that from **Equation 1**

Step 4: Adjust Urea clearance for incorporation into Standard Kt/V

Adjusted KrU=Urea clearance \* fKrU **(EQUATION 10)**

Where Urea clearance is from equation 6 and fKrU is from **equation 9**

From equation 4 in Daugirdas, Kidney International (2010) 77, 637–644

Step5: Calculate Residual Renal Function equivalent Standard Kt/V

This is calculated as K\*t/V where K=adjusted KrU, t=minutes in 7 days, V=Adjusted Watson Volume

$$\text{Residual Renal Standard Kt/V} = \frac{\text{Adjusted KrU} \times 10080}{\text{Adjusted Watson Volume} \times 1000}$$

**(EQUATION 11)**

from equation 5 in Daugirdas Kidney International (2010) 77, 637–644

Where Adjusted KrU is from equation 10 (ml/min) and Adjusted Watson Volume (L) is from **Equation 3** above.

# Reporting checklist for protocol of a clinical trial.

Based on the SPIRIT guidelines.

## Instructions to authors

Complete this checklist by entering the page numbers from your manuscript where readers will find each of the items listed below.

Your article may not currently address all the items on the checklist. Please modify your text to include the missing information. If you are certain that an item does not apply, please write "n/a" and provide a short explanation.

Upload your completed checklist as an extra file when you submit to a journal.

In your methods section, say that you used the SPIRIT reporting guidelines, and cite them as:

Chan A-W, Tetzlaff JM, Altman DG, Laupacis A, Gøtzsche PC, Krleža-Jerić K, Hróbjartsson A, Mann H, Dickersin K, Berlin J, Doré C, Parulekar W, Summerskill W, Groves T, Schulz K, Sox H, Rockhold FW, Rennie D, Moher D. SPIRIT 2013 Statement: Defining standard protocol items for clinical trials. *Ann Intern Med.* 2013;158(3):200-207

|                                             |                     | Reporting Item                                                                                               | Page Number |
|---------------------------------------------|---------------------|--------------------------------------------------------------------------------------------------------------|-------------|
| <b>Administrative information</b>           |                     |                                                                                                              |             |
| Title                                       | <a href="#">#1</a>  | Descriptive title identifying the study design, population, interventions, and, if applicable, trial acronym | 1           |
| Trial registration                          | <a href="#">#2a</a> | Trial identifier and registry name. If not yet registered, name of intended registry                         | 2           |
| Trial registration: data set                | <a href="#">#2b</a> | All items from the World Health Organization Trial Registration Data Set                                     | N/A         |
| Protocol version                            | <a href="#">#3</a>  | Date and version identifier                                                                                  | N/A         |
| Funding                                     | <a href="#">#4</a>  | Sources and types of financial, material, and other support                                                  | 5           |
| Roles and responsibilities: contributorship | <a href="#">#5a</a> | Names, affiliations, and roles of protocol contributors                                                      | 13          |

|    |                           |                     |                                                                      |     |
|----|---------------------------|---------------------|----------------------------------------------------------------------|-----|
| 1  | Roles and                 | <a href="#">#5b</a> | Name and contact information for the trial sponsor                   | 5   |
| 2  | responsibilities:         |                     |                                                                      |     |
| 3  | sponsor contact           |                     |                                                                      |     |
| 4  | information               |                     |                                                                      |     |
| 5  |                           |                     |                                                                      |     |
| 6  |                           |                     |                                                                      |     |
| 7  |                           |                     |                                                                      |     |
| 8  | Roles and                 | <a href="#">#5c</a> | Role of study sponsor and funders, if any, in study design;          | 13  |
| 9  | responsibilities:         |                     | collection, management, analysis, and interpretation of data;        |     |
| 10 | sponsor and funder        |                     | writing of the report; and the decision to submit the report for     |     |
| 11 |                           |                     | publication, including whether they will have ultimate authority     |     |
| 12 |                           |                     | over any of these activities                                         |     |
| 13 |                           |                     |                                                                      |     |
| 14 |                           |                     |                                                                      |     |
| 15 |                           |                     |                                                                      |     |
| 16 | Roles and                 | <a href="#">#5d</a> | Composition, roles, and responsibilities of the coordinating centre, | 13  |
| 17 | responsibilities:         |                     | steering committee, endpoint adjudication committee, data            |     |
| 18 | committees                |                     | management team, and other individuals or groups overseeing the      |     |
| 19 |                           |                     | trial, if applicable (see Item 21a for data monitoring committee)    |     |
| 20 |                           |                     |                                                                      |     |
| 21 |                           |                     |                                                                      |     |
| 22 |                           |                     |                                                                      |     |
| 23 | <b>Introduction</b>       |                     |                                                                      |     |
| 24 |                           |                     |                                                                      |     |
| 25 | Background and            | <a href="#">#6a</a> | Description of research question and justification for undertaking   | 4,5 |
| 26 | rationale                 |                     | the trial, including summary of relevant studies (published and      |     |
| 27 |                           |                     | unpublished) examining benefits and harms for each intervention      |     |
| 28 |                           |                     |                                                                      |     |
| 29 |                           |                     |                                                                      |     |
| 30 | Background and            | <a href="#">#6b</a> | Explanation for choice of comparators                                | 13  |
| 31 | rationale: choice of      |                     |                                                                      |     |
| 32 | comparators               |                     |                                                                      |     |
| 33 |                           |                     |                                                                      |     |
| 34 |                           |                     |                                                                      |     |
| 35 |                           |                     |                                                                      |     |
| 36 | Objectives                | <a href="#">#7</a>  | Specific objectives or hypotheses                                    | 6   |
| 37 |                           |                     |                                                                      |     |
| 38 | Trial design              | <a href="#">#8</a>  | Description of trial design including type of trial (eg, parallel    | 5   |
| 39 |                           |                     | group, crossover, factorial, single group), allocation ratio, and    |     |
| 40 |                           |                     | framework (eg, superiority, equivalence, non-inferiority,            |     |
| 41 |                           |                     | exploratory)                                                         |     |
| 42 |                           |                     |                                                                      |     |
| 43 |                           |                     |                                                                      |     |
| 44 |                           |                     |                                                                      |     |
| 45 | <b>Methods:</b>           |                     |                                                                      |     |
| 46 | <b>Participants,</b>      |                     |                                                                      |     |
| 47 | <b>interventions, and</b> |                     |                                                                      |     |
| 48 | <b>outcomes</b>           |                     |                                                                      |     |
| 49 |                           |                     |                                                                      |     |
| 50 |                           |                     |                                                                      |     |
| 51 | Study setting             | <a href="#">#9</a>  | Description of study settings (eg, community clinic, academic        | 5   |
| 52 |                           |                     | hospital) and list of countries where data will be collected.        |     |
| 53 |                           |                     | Reference to where list of study sites can be obtained               |     |
| 54 |                           |                     |                                                                      |     |
| 55 |                           |                     |                                                                      |     |
| 56 |                           |                     |                                                                      |     |
| 57 | Eligibility criteria      | <a href="#">#10</a> | Inclusion and exclusion criteria for participants. If applicable,    | 7   |
| 58 |                           |                     | eligibility criteria for study centres and individuals who will      |     |
| 59 |                           |                     |                                                                      |     |
| 60 |                           |                     |                                                                      |     |

|    |                              |                                                                                          |          |
|----|------------------------------|------------------------------------------------------------------------------------------|----------|
|    |                              | perform the interventions (eg, surgeons, psychotherapists)                               |          |
| 1  |                              |                                                                                          |          |
| 2  | Interventions:               | <a href="#">#11a</a> Interventions for each group with sufficient detail to allow        | 9        |
| 3  | description                  | replication, including how and when they will be administered                            |          |
| 4  |                              |                                                                                          |          |
| 5  | Interventions:               | <a href="#">#11b</a> Criteria for discontinuing or modifying allocated interventions for | 10       |
| 6  | modifications                | a given trial participant (eg, drug dose change in response to                           |          |
| 7  |                              | harms, participant request, or improving / worsening disease)                            |          |
| 8  |                              |                                                                                          |          |
| 9  | Interventions:               | <a href="#">#11c</a> Strategies to improve adherence to intervention protocols, and any  | 10       |
| 10 | adherence                    | procedures for monitoring adherence (eg, drug tablet return;                             |          |
| 11 |                              | laboratory tests)                                                                        |          |
| 12 | Interventions:               | <a href="#">#11d</a> Relevant concomitant care and interventions that are permitted or   | 9        |
| 13 | concomitant care             | prohibited during the trial                                                              |          |
| 14 |                              |                                                                                          |          |
| 15 | Outcomes                     | <a href="#">#12</a> Primary, secondary, and other outcomes, including the specific       | 6, Table |
| 16 |                              | measurement variable (eg, systolic blood pressure), analysis metric                      | 1        |
| 17 |                              | (eg, change from baseline, final value, time to event), method of                        |          |
| 18 |                              | aggregation (eg, median, proportion), and time point for each                            |          |
| 19 |                              | outcome. Explanation of the clinical relevance of chosen efficacy                        |          |
| 20 |                              | and harm outcomes is strongly recommended                                                |          |
| 21 | Participant timeline         | <a href="#">#13</a> Time schedule of enrolment, interventions (including any run-ins     | Table 2, |
| 22 |                              | and washouts), assessments, and visits for participants. A                               | Figure 1 |
| 23 |                              | schematic diagram is highly recommended (see Figure)                                     |          |
| 24 |                              |                                                                                          |          |
| 25 | Sample size                  | <a href="#">#14</a> Estimated number of participants needed to achieve study             | 10       |
| 26 |                              | objectives and how it was determined, including clinical and                             |          |
| 27 |                              | statistical assumptions supporting any sample size calculations                          |          |
| 28 |                              |                                                                                          |          |
| 29 | Recruitment                  | <a href="#">#15</a> Strategies for achieving adequate participant enrolment to reach     | 6, 8     |
| 30 |                              | target sample size                                                                       |          |
| 31 |                              |                                                                                          |          |
| 32 |                              |                                                                                          |          |
| 33 |                              |                                                                                          |          |
| 34 |                              |                                                                                          |          |
| 35 |                              |                                                                                          |          |
| 36 |                              |                                                                                          |          |
| 37 |                              |                                                                                          |          |
| 38 |                              |                                                                                          |          |
| 39 |                              |                                                                                          |          |
| 40 |                              |                                                                                          |          |
| 41 |                              |                                                                                          |          |
| 42 |                              |                                                                                          |          |
| 43 |                              |                                                                                          |          |
| 44 |                              |                                                                                          |          |
| 45 | <b>Methods: Assignment</b>   |                                                                                          |          |
| 46 | <b>of interventions (for</b> |                                                                                          |          |
| 47 | <b>controlled trials)</b>    |                                                                                          |          |
| 48 |                              |                                                                                          |          |
| 49 |                              |                                                                                          |          |
| 50 | Allocation: sequence         | <a href="#">#16a</a> Method of generating the allocation sequence (eg, computer-         | 8        |
| 51 | generation                   | generated random numbers), and list of any factors for                                   |          |
| 52 |                              | stratification. To reduce predictability of a random sequence,                           |          |
| 53 |                              | details of any planned restriction (eg, blocking) should be provided                     |          |
| 54 |                              | in a separate document that is unavailable to those who enrol                            |          |
| 55 |                              | participants or assign interventions                                                     |          |
| 56 |                              |                                                                                          |          |
| 57 |                              |                                                                                          |          |
| 58 |                              |                                                                                          |          |
| 59 |                              |                                                                                          |          |
| 60 |                              |                                                                                          |          |

|    |                        |                      |                                                                       |        |
|----|------------------------|----------------------|-----------------------------------------------------------------------|--------|
| 1  | Allocation             | <a href="#">#16b</a> | Mechanism of implementing the allocation sequence (eg, central        | 8      |
| 2  | concealment            |                      | telephone; sequentially numbered, opaque, sealed envelopes),          |        |
| 3  | mechanism              |                      | describing any steps to conceal the sequence until interventions are  |        |
| 4  |                        |                      | assigned                                                              |        |
| 5  |                        |                      |                                                                       |        |
| 6  |                        |                      |                                                                       |        |
| 7  |                        |                      |                                                                       |        |
| 8  | Allocation:            | <a href="#">#16c</a> | Who will generate the allocation sequence, who will enrol             | 8      |
| 9  | implementation         |                      | participants, and who will assign participants to interventions       |        |
| 10 |                        |                      |                                                                       |        |
| 11 | Blinding (masking)     | <a href="#">#17a</a> | Who will be blinded after assignment to interventions (eg, trial      | N/A    |
| 12 |                        |                      | participants, care providers, outcome assessors, data analysts), and  |        |
| 13 |                        |                      | how                                                                   |        |
| 14 |                        |                      |                                                                       |        |
| 15 |                        |                      |                                                                       |        |
| 16 |                        |                      |                                                                       |        |
| 17 | Blinding (masking):    | <a href="#">#17b</a> | If blinded, circumstances under which unblinding is permissible,      | N/A    |
| 18 | emergency unblinding   |                      | and procedure for revealing a participant's allocated intervention    |        |
| 19 |                        |                      | during the trial                                                      |        |
| 20 |                        |                      |                                                                       |        |
| 21 |                        |                      |                                                                       |        |
| 22 | <b>Methods: Data</b>   |                      |                                                                       |        |
| 23 | <b>collection,</b>     |                      |                                                                       |        |
| 24 | <b>management, and</b> |                      |                                                                       |        |
| 25 | <b>analysis</b>        |                      |                                                                       |        |
| 26 |                        |                      |                                                                       |        |
| 27 |                        |                      |                                                                       |        |
| 28 |                        |                      |                                                                       |        |
| 29 | Data collection plan   | <a href="#">#18a</a> | Plans for assessment and collection of outcome, baseline, and         | 10     |
| 30 |                        |                      | other trial data, including any related processes to promote data     |        |
| 31 |                        |                      | quality (eg, duplicate measurements, training of assessors) and a     |        |
| 32 |                        |                      | description of study instruments (eg, questionnaires, laboratory      |        |
| 33 |                        |                      | tests) along with their reliability and validity, if known. Reference |        |
| 34 |                        |                      | to where data collection forms can be found, if not in the protocol   |        |
| 35 |                        |                      |                                                                       |        |
| 36 |                        |                      |                                                                       |        |
| 37 |                        |                      |                                                                       |        |
| 38 |                        |                      |                                                                       |        |
| 39 | Data collection plan:  | <a href="#">#18b</a> | Plans to promote participant retention and complete follow-up,        | 10     |
| 40 | retention              |                      | including list of any outcome data to be collected for participants   |        |
| 41 |                        |                      | who discontinue or deviate from intervention protocols                |        |
| 42 |                        |                      |                                                                       |        |
| 43 |                        |                      |                                                                       |        |
| 44 | Data management        | <a href="#">#19</a>  | Plans for data entry, coding, security, and storage, including any    | 10     |
| 45 |                        |                      | related processes to promote data quality (eg, double data entry;     |        |
| 46 |                        |                      | range checks for data values). Reference to where details of data     |        |
| 47 |                        |                      | management procedures can be found, if not in the protocol            |        |
| 48 |                        |                      |                                                                       |        |
| 49 |                        |                      |                                                                       |        |
| 50 |                        |                      |                                                                       |        |
| 51 | Statistics: outcomes   | <a href="#">#20a</a> | Statistical methods for analysing primary and secondary outcomes.     | 11, 12 |
| 52 |                        |                      | Reference to where other details of the statistical analysis plan can |        |
| 53 |                        |                      | be found, if not in the protocol                                      |        |
| 54 |                        |                      |                                                                       |        |
| 55 |                        |                      |                                                                       |        |
| 56 | Statistics: additional | <a href="#">#20b</a> | Methods for any additional analyses (eg, subgroup and adjusted        | 11, 12 |
| 57 | analyses               |                      | analyses)                                                             |        |
| 58 |                        |                      |                                                                       |        |
| 59 |                        |                      |                                                                       |        |
| 60 |                        |                      |                                                                       |        |

|    |                            |                      |                                                                       |        |
|----|----------------------------|----------------------|-----------------------------------------------------------------------|--------|
| 1  | Statistics: analysis       | <a href="#">#20c</a> | Definition of analysis population relating to protocol non-           | 11, 12 |
| 2  | population and missing     |                      | adherence (eg, as randomised analysis), and any statistical           |        |
| 3  | data                       |                      | methods to handle missing data (eg, multiple imputation)              |        |
| 4  |                            |                      |                                                                       |        |
| 5  |                            |                      |                                                                       |        |
| 6  | <b>Methods: Monitoring</b> |                      |                                                                       |        |
| 7  |                            |                      |                                                                       |        |
| 8  | Data monitoring:           | <a href="#">#21a</a> | Composition of data monitoring committee (DMC); summary of            | 5      |
| 9  | formal committee           |                      | its role and reporting structure; statement of whether it is          |        |
| 10 |                            |                      | independent from the sponsor and competing interests; and             |        |
| 11 |                            |                      | reference to where further details about its charter can be found, if |        |
| 12 |                            |                      | not in the protocol. Alternatively, an explanation of why a DMC is    |        |
| 13 |                            |                      | not needed                                                            |        |
| 14 |                            |                      |                                                                       |        |
| 15 | Data monitoring:           | <a href="#">#21b</a> | Description of any interim analyses and stopping guidelines,          | 5      |
| 16 | interim analysis           |                      | including who will have access to these interim results and make      |        |
| 17 |                            |                      | the final decision to terminate the trial                             |        |
| 18 |                            |                      |                                                                       |        |
| 19 |                            |                      |                                                                       |        |
| 20 | Harms                      | <a href="#">#22</a>  | Plans for collecting, assessing, reporting, and managing solicited    | 11     |
| 21 |                            |                      | and spontaneously reported adverse events and other unintended        |        |
| 22 |                            |                      | effects of trial interventions or trial conduct                       |        |
| 23 |                            |                      |                                                                       |        |
| 24 |                            |                      |                                                                       |        |
| 25 | Auditing                   | <a href="#">#23</a>  | Frequency and procedures for auditing trial conduct, if any, and      | N/A    |
| 26 |                            |                      | whether the process will be independent from investigators and the    |        |
| 27 |                            |                      | sponsor                                                               |        |
| 28 |                            |                      |                                                                       |        |
| 29 |                            |                      |                                                                       |        |
| 30 |                            |                      |                                                                       |        |
| 31 |                            |                      |                                                                       |        |
| 32 |                            |                      |                                                                       |        |
| 33 |                            |                      |                                                                       |        |
| 34 | <b>Ethics and</b>          |                      |                                                                       |        |
| 35 | <b>dissemination</b>       |                      |                                                                       |        |
| 36 |                            |                      |                                                                       |        |
| 37 |                            |                      |                                                                       |        |
| 38 | Research ethics            | <a href="#">#24</a>  | Plans for seeking research ethics committee / institutional review    | 2, 5   |
| 39 | approval                   |                      | board (REC / IRB) approval                                            |        |
| 40 |                            |                      |                                                                       |        |
| 41 |                            |                      |                                                                       |        |
| 42 | Protocol amendments        | <a href="#">#25</a>  | Plans for communicating important protocol modifications (eg,         | N/A    |
| 43 |                            |                      | changes to eligibility criteria, outcomes, analyses) to relevant      |        |
| 44 |                            |                      | parties (eg, investigators, REC / IRBs, trial participants, trial     |        |
| 45 |                            |                      | registries, journals, regulators)                                     |        |
| 46 |                            |                      |                                                                       |        |
| 47 |                            |                      |                                                                       |        |
| 48 |                            |                      |                                                                       |        |
| 49 | Consent or assent          | <a href="#">#26a</a> | Who will obtain informed consent or assent from potential trial       | 7      |
| 50 |                            |                      | participants or authorised surrogates, and how (see Item 32)          |        |
| 51 |                            |                      |                                                                       |        |
| 52 |                            |                      |                                                                       |        |
| 53 | Consent or assent:         | <a href="#">#26b</a> | Additional consent provisions for collection and use of participant   | N/A    |
| 54 | ancillary studies          |                      | data and biological specimens in ancillary studies, if applicable     |        |
| 55 |                            |                      |                                                                       |        |
| 56 |                            |                      |                                                                       |        |
| 57 | Confidentiality            | <a href="#">#27</a>  | How personal information about potential and enrolled participants    | 8      |
| 58 |                            |                      | will be collected, shared, and maintained in order to protect         |        |
| 59 |                            |                      |                                                                       |        |
| 60 |                            |                      |                                                                       |        |

confidentiality before, during, and after the trial

|    |                          |                      |                                                                        |
|----|--------------------------|----------------------|------------------------------------------------------------------------|
| 1  |                          |                      |                                                                        |
| 2  |                          |                      |                                                                        |
| 3  | Declaration of interests | <a href="#">#28</a>  | Financial and other competing interests for principal investigators 13 |
| 4  |                          |                      | for the overall trial and each study site                              |
| 5  |                          |                      |                                                                        |
| 6  | Data access              | <a href="#">#29</a>  | Statement of who will have access to the final trial dataset, and NA   |
| 7  |                          |                      | disclosure of contractual agreements that limit such access for        |
| 8  |                          |                      | investigators                                                          |
| 9  |                          |                      |                                                                        |
| 10 |                          |                      |                                                                        |
| 11 | Ancillary and post trial | <a href="#">#30</a>  | Provisions, if any, for ancillary and post-trial care, and for NA      |
| 12 | care                     |                      | compensation to those who suffer harm from trial participation         |
| 13 |                          |                      |                                                                        |
| 14 |                          |                      |                                                                        |
| 15 | Dissemination policy:    | <a href="#">#31a</a> | Plans for investigators and sponsor to communicate trial results to 2  |
| 16 | trial results            |                      | participants, healthcare professionals, the public, and other          |
| 17 |                          |                      | relevant groups (eg, via publication, reporting in results databases,  |
| 18 |                          |                      | or other data sharing arrangements), including any publication         |
| 19 |                          |                      | restrictions                                                           |
| 20 |                          |                      |                                                                        |
| 21 |                          |                      |                                                                        |
| 22 |                          |                      |                                                                        |
| 23 | Dissemination policy:    | <a href="#">#31b</a> | Authorship eligibility guidelines and any intended use of NA           |
| 24 | authorship               |                      | professional writers                                                   |
| 25 |                          |                      |                                                                        |
| 26 |                          |                      |                                                                        |
| 27 | Dissemination policy:    | <a href="#">#31c</a> | Plans, if any, for granting public access to the full protocol, NA     |
| 28 | reproducible research    |                      | participant-level dataset, and statistical code                        |
| 29 |                          |                      |                                                                        |
| 30 |                          |                      |                                                                        |

## 31 Appendices

|    |                      |                     |                                                                      |
|----|----------------------|---------------------|----------------------------------------------------------------------|
| 32 |                      |                     |                                                                      |
| 33 |                      |                     |                                                                      |
| 34 | Informed consent     | <a href="#">#32</a> | Model consent form and other related documentation given to 6, 7     |
| 35 | materials            |                     | participants and authorised surrogates                               |
| 36 |                      |                     |                                                                      |
| 37 |                      |                     |                                                                      |
| 38 | Biological specimens | <a href="#">#33</a> | Plans for collection, laboratory evaluation, and storage of Table 2  |
| 39 |                      |                     | biological specimens for genetic or molecular analysis in the        |
| 40 |                      |                     | current trial and for future use in ancillary studies, if applicable |
| 41 |                      |                     |                                                                      |
| 42 |                      |                     |                                                                      |

## 43 Notes:

- 44
- 45 • 13: Table 2, Figure 1 The SPIRIT checklist is distributed under the terms of the Creative Commons
- 46 Attribution License CC-BY-ND 3.0. This checklist was completed on 21. November 2019 using
- 47 <https://www.goodreports.org/>, a tool made by the [EQUATOR Network](#) in collaboration with [Penelope.ai](#)
- 48
- 49
- 50
- 51
- 52
- 53
- 54
- 55
- 56
- 57
- 58
- 59
- 60

# BMJ Open

## Impact of Incremental versus Conventional Initiation of Haemodialysis on Residual Kidney Function: Study protocol for a multicentre feasibility randomised controlled trial.

|                                 |                                                                                                                                                                                                                                                                                                                                                                                                                                                                                                                                                                                                                                                                              |
|---------------------------------|------------------------------------------------------------------------------------------------------------------------------------------------------------------------------------------------------------------------------------------------------------------------------------------------------------------------------------------------------------------------------------------------------------------------------------------------------------------------------------------------------------------------------------------------------------------------------------------------------------------------------------------------------------------------------|
| Journal:                        | <i>BMJ Open</i>                                                                                                                                                                                                                                                                                                                                                                                                                                                                                                                                                                                                                                                              |
| Manuscript ID                   | bmjopen-2019-035919.R1                                                                                                                                                                                                                                                                                                                                                                                                                                                                                                                                                                                                                                                       |
| Article Type:                   | Protocol                                                                                                                                                                                                                                                                                                                                                                                                                                                                                                                                                                                                                                                                     |
| Date Submitted by the Author:   | 02-Mar-2020                                                                                                                                                                                                                                                                                                                                                                                                                                                                                                                                                                                                                                                                  |
| Complete List of Authors:       | KAJA KAMAL, RAJA MOHAMMED; East and North Hertfordshire NHS Trust, Renal Unit; University of Hertfordshire<br>Farrington, Ken; East and North Hertfordshire NHS Trust, Renal Unit; University of Hertfordshire<br>Wellsted, David; University of Hertfordshire<br>Sridharan , Sivakumar; East and North Hertfordshire NHS Trust, Renal Unit; University of Hertfordshire<br>Alchi, Bassam; Royal Berkshire NHS Foundation Trust, Renal Unit<br>Burton, James; University Hospitals of Leicester NHS Trust, Renal Unit<br>Davenport, Andrew; Royal Free Hospital, Renal Unit<br>Vilar, Enric; East and North Hertfordshire NHS Trust, Renal Unit; University of Hertfordshire |
| <b>Primary Subject Heading</b>: | Renal medicine                                                                                                                                                                                                                                                                                                                                                                                                                                                                                                                                                                                                                                                               |
| Secondary Subject Heading:      | Renal medicine                                                                                                                                                                                                                                                                                                                                                                                                                                                                                                                                                                                                                                                               |
| Keywords:                       | Adult nephrology < NEPHROLOGY, Dialysis < NEPHROLOGY, End stage renal failure < NEPHROLOGY                                                                                                                                                                                                                                                                                                                                                                                                                                                                                                                                                                                   |
|                                 |                                                                                                                                                                                                                                                                                                                                                                                                                                                                                                                                                                                                                                                                              |

SCHOLARONE™  
Manuscripts





I, the Submitting Author has the right to grant and does grant on behalf of all authors of the Work (as defined in the below author licence), an exclusive licence and/or a non-exclusive licence for contributions from authors who are: i) UK Crown employees; ii) where BMJ has agreed a CC-BY licence shall apply, and/or iii) in accordance with the terms applicable for US Federal Government officers or employees acting as part of their official duties; on a worldwide, perpetual, irrevocable, royalty-free basis to BMJ Publishing Group Ltd ("BMJ") its licensees and where the relevant Journal is co-owned by BMJ to the co-owners of the Journal, to publish the Work in this journal and any other BMJ products and to exploit all rights, as set out in our [licence](#).

The Submitting Author accepts and understands that any supply made under these terms is made by BMJ to the Submitting Author unless you are acting as an employee on behalf of your employer or a postgraduate student of an affiliated institution which is paying any applicable article publishing charge ("APC") for Open Access articles. Where the Submitting Author wishes to make the Work available on an Open Access basis (and intends to pay the relevant APC), the terms of reuse of such Open Access shall be governed by a Creative Commons licence – details of these licences and which [Creative Commons](#) licence will apply to this Work are set out in our licence referred to above.

Other than as permitted in any relevant BMJ Author's Self Archiving Policies, I confirm this Work has not been accepted for publication elsewhere, is not being considered for publication elsewhere and does not duplicate material already published. I confirm all authors consent to publication of this Work and authorise the granting of this licence.

**TITLE:**

Impact of Incremental versus Conventional Initiation of Haemodialysis on Residual Kidney Function: Study protocol for a multicentre feasibility randomised controlled trial.

**Author:**

Kaja Kamal RM<sup>1,2</sup>, Farrington K<sup>1,2</sup>, Wellsted D<sup>2</sup>, Sridharan S<sup>1,2</sup>, Alchi B<sup>3</sup>, Burton J<sup>4</sup>, Davenport A<sup>3</sup>, Vilar E<sup>1,2</sup>

**Institution:** <sup>1</sup>Renal Unit, Lister Hospital, East and North Hertfordshire NHS Trust, UK.

<sup>2</sup>University of Hertfordshire, Hatfield, UK.

<sup>3</sup>Royal Berkshire Hospital NHS Trust, UK.

<sup>4</sup>University Hospitals of Leicester NHS Trust, UK.

<sup>5</sup>Royal Free London NHS Foundation Trust, UK.

**Corresponding author**

Dr Enric Vilar

Email [enric.vilar@nhs.net](mailto:enric.vilar@nhs.net)

Renal Unit, Lister Hospital, East and North Herts NHS Trust, Hertfordshire, SG1 4AB, UK

Word count 3151

## ABSTRACT

### Introduction

Preserving Residual Kidney Function(RKF) may be beneficial to patients on haemodialysis (HD) and it has been proposed that commencing dialysis incrementally rather than three times a week may preserve RKF. In Incremental HD, target dose includes a contribution from RKF, which is added to HD dose, allowing individualisation of the HD prescription. We will conduct a feasibility randomised controlled trial(RCT) comparing incremental HD and conventional three times weekly treatments in incident HD patients. The study is designed also to provide pilot data to allow determination of effect size to power a definitive study.

### Methods and Analysis

After screening to ensure native renal urea clearance  $>3\text{ml}/\text{min}/1.73\text{m}^2$ , the study will randomise 54 patients within 3 months of HD initiation to conventional in-centre thrice weekly dialysis or incremental in-centre HD commencing two days a week. Subjects will be followed up for 12 months. The study will be carried out across 4 UK renal centres.

The primary outcome is to evaluate the feasibility of conducting a definitive RCT and to estimate the difference in rate of decline of RKF between the two groups at 6 and 12-month time points. Secondary outcomes will include the impact of dialysis intensity on vascular access events, major adverse cardiac events(MACE) and survival. Impact of dialysis intensity on patient reported outcomes measures, cognition and frailty will be assessed using EQ-5D-5L, PHQ-9, Illness intrusiveness rating score(IIRS), Montreal Cognitive assessment(MoCA), and Clinical Frailty Score(CFS). Safety outcomes include hospitalisation, fluid overload episodes, hyperkalaemia events and vascular access events.

This study will inform the design of a definitive study, adequately powered to determine whether RKF is better preserved after incremental HD initiation compared to conventional initiation.

### Ethics and dissemination

Ethics approval has been granted by Cambridge South Research Ethics Committee, United Kingdom(REC17/EE/0311). Results will be disseminated via peer-reviewed publication.

**Trial registration number:**NCT03418181

Key words: 3 -10 keywords

Residual Kidney Function -End stage renal disease – HD - RCT – Randomised Controlled Trial

**Strengths and limitations of this study**

- There are no randomised studies comparing incremental HD and conventional three times weekly treatments in incident HD patients. This study will address this gap.
- It will provide data on feasibility of recruitment to a definitive study together with an estimate of the effect size of group differences in rate of loss residual kidney function allowing sample size calculation.
- Impact and intrusiveness of dialysis intensity will also be compared between groups.
- The sample size will not permit definitive determination of differences in the rate of decline of RKF between groups.

## Background

Most end stage renal failure (ESRF) patients have a degree of native kidney function (Residual Kidney Function, RKF) remaining when they initiate HD. There has been recent interest in incremental HD, a method of individualising HD according to the level of RKF to permit dialysis to be commenced at a lower intensity than conventional approaches allow. Most patients commence dialysis using conventional three times weekly dialysis with RKF usually not accounted for in prescribing dialysis dose. In Incremental HD, RKF is combined with dialysis clearance to provide an overall measure of solute removal allowing the dose provided by dialysis to be individualised. Various algorithms are available to assist with this such as Standard Kt/V (Std Kt/V) which includes contributions from both Std Kt/V<sub>RKF</sub> and Std Kt/V<sub>dialysis</sub> [1-3]. In this approach, reduction of dialysis dose may be considered provided that the combined urea clearance targets are met and other markers of dialysis adequacy such as blood pressure, inter-dialytic weight gains, anaemia, potassium, phosphate control, nutrition and general well-being are not compromised. The technique requires that the proportion of target dose provided by dialysis is increased as the RKF declines or if there are any other indicators for inadequate dialysis. The dialysis team and patients need to be aware of the importance of regular measurement of RKF 1 to 3 monthly [4]. This incremental approach may not be suitable for patients who are unable or unwilling to collect urine samples.

Traditionally RKF has been incorporated into peritoneal dialysis dosing but it has not been included in calculating HD dose due to limited practical experiences and outcome data from clinical studies. There are no RCTs that compare clinical outcomes of incremental HD and those of conventional thrice-weekly HD. A number of observational studies have compared clinical outcomes of twice-weekly HD and conventional thrice-weekly HD regimens [5-19]. These studies suggest that the mortality risks and survival outcomes are not inferior in those on the twice weekly dialysis regimen compared and those treated conventionally, provided there is adequate RKF. Importantly, several non-randomised studies have suggested that RKF is better preserved in those dialysed twice weekly commencing soon after dialysis initiation [6,10, 11, 17, 18]. Preservation of RKF may provide clinical benefits to HD patients including

1  
2  
3 better fluid control, significant solute and fluid removal. It is also associated with improved  
4 quality of life and survival.  
5  
6  
7

8  
9 These findings indicate the need for a prospective RCT comparing RKF preservation following  
10 incremental and conventional initiation of dialysis. We are undertaking a study to determine  
11 the feasibility of conducting such a study. Our study will also provide pilot data to estimate  
12 differences in the rate of decline of RKF in the first year after commencing dialysis using either  
13 conventional or incremental approaches. The primary outcome of our study is to evaluate the  
14 feasibility of conducting a RCT in patients who have recently started HD. Patients will be  
15 randomised either to an incremental arm initiating with twice weekly dialysis or to a  
16 conventional three times weekly dialysis. Our study will explore key methodological, design,  
17 and safety issues, and also estimate an effect size. These findings will facilitate the design of  
18 a subsequent definitive study.  
19  
20  
21  
22  
23  
24  
25  
26  
27  
28

## 29 **Methods/Design**

### 30 **Funding and governance**

31  
32 The study is funded by the British Kidney Patient Association & British Renal Society Joint  
33 Grants Programme, grant number 16-020. The study received ethical approval from East of  
34 England – Cambridge South (REC reference 17/EE/0311; IRAS project ID 219032). The trial is  
35 sponsored by East and North Hertfordshire NHS Trust. The University of Hertfordshire Clinical  
36 Trial Support Network (CTSN) will provide independent support for randomisation and  
37 monitoring of the study. The conduct of the trial will be overseen by a Steering group which  
38 will meet regularly and will include an independent Chair and co-applicants. The CTSN will  
39 monitor compliance with the study protocol at 3 months following study initiation and then  
40 as required by sponsor scrutiny of data returns.  
41  
42  
43  
44  
45  
46  
47  
48  
49  
50

### 51 **Patient and public involvement**

52  
53 A summary of the initial protocol was shared with ten patients who were asked to comment on the  
54 study design, the potential willingness of patients to participate in the study, and the burden of study  
55 procedures and interventions. Their comments were taken account of in preparing the final version  
56 of the protocol. Patients will be involved in interpreting study finding and in design of definitive study.  
57  
58  
59  
60

1  
2  
3 We will report a summary of results to patients in a personal communication by mail. We will also  
4 summarise results to local patient association newsletters.  
5  
6  
7

## 8 Setting

9  
10 The study will take place in four NHS Trust renal units – East and North Hertfordshire, Royal  
11 Free Hospitals, Royal Berkshire Hospitals and University Hospitals of Leicester. The total  
12 number of participants from all centres will be 54. Recruitment commenced in January 2018  
13 and completion of follow up will be in May 2020.  
14  
15  
16  
17

## 18 Study Objectives and End Points:

19  
20 The study's primary objective is to determine the feasibility of conducting a definitive RCT of  
21 incremental HD initiation, compared with conventional thrice weekly in-centre HD initiation.  
22 There are a number of aspects to this primary objective which are summarised in Table 1. We  
23 will determine, at each study site, the proportion of incident HD patients it is practical to  
24 approach, who pre-screen as suitable for formal study screening (eligibility for screening). We  
25 will determine the proportion of those patients who consent undergo formal screening, pass  
26 the screening test and are randomised (recruitability). We will also determine the study  
27 retention rate (retainability) as well as fidelity to the protocol (protocol adherence) of patients  
28 in the study. Numerators and denominators for these parameters are shown in Figure 1. The  
29 study will establish evidence for the safety of the incremental approach. It will also generate  
30 data allowing estimation of the effect size of the difference in rate of decline of RKF in the 6  
31 months following randomisation between incremental and conventional HD arms.  
32  
33  
34  
35  
36  
37  
38  
39  
40  
41  
42  
43

44 Secondary objectives of the study are to determine whether there is a signal of benefit for  
45 incremental HD initiation for improving Quality of Life, mood, cognitive function, illness  
46 intrusiveness, functional status, frailty, risk of vascular access failure or interventions, major  
47 adverse cardiac events and survival. Specific tools used and methods to measure secondary  
48 outcomes related to these secondary objectives are detailed in Table 1. Illness intrusiveness  
49 will be measured with the Illness Intrusiveness Rating Scale, a validated tool to measure  
50 impact of the dialysis treatment and disease on physiologically meaningful activity and its  
51 psychosocial impact[20]. Quality of Life will be measured using EQ-5D-5L, a validated tool  
52 which will capture different dimensions of quality of life including anxiety/depression and  
53  
54  
55  
56  
57  
58  
59  
60

1  
2  
3 pain/discomfort and can be used in health-economic evaluation[21]. Cognitive function will  
4 be measured using the Montreal Cognitive Assessment (MoCA) which is a tool for assessment  
5 of cognitive function that has been validated in dialysis patients against detailed  
6 neurophysiological testing covering different domains of cognitive function and provides  
7 good sensitivity and specificity for identifying cognitive impairment in this population [22, 23].  
8 Clinical frailty will be measured using the Clinical Frailty Score[24, 25].  
9  
10  
11  
12  
13  
14  
15  
16  
17  
18  
19  
20  
21  
22  
23  
24  
25  
26  
27  
28  
29  
30  
31  
32  
33  
34  
35  
36  
37  
38  
39  
40  
41  
42  
43  
44  
45  
46  
47  
48  
49  
50  
51  
52  
53  
54  
55  
56  
57  
58  
59  
60

For peer review only



Table 1 Study objectives

| Primary Objective                                                                                                  | Primary Outcome                                                                                                                                                                                                                                                                                                   |
|--------------------------------------------------------------------------------------------------------------------|-------------------------------------------------------------------------------------------------------------------------------------------------------------------------------------------------------------------------------------------------------------------------------------------------------------------|
| The proportion of eligible subjects agreeing to participate in the study – <b>Recruitability</b>                   | * Proportion incident HD patients it is practical to approach, who pre-screen as suitable for screening (eligibility for screening)<br>*Proportion of screened patients who fulfil all eligibility criteria for participation in the study<br>*Proportion of these patients who agree to participate in the study |
| The proportion of randomised subjects who remain in the study – <b>Retainability</b>                               | Proportion of patients randomised who remain in the study excluding study withdrawals, and reasons for withdrawals                                                                                                                                                                                                |
| The proportion of subjects who adhere to protocol-driven changes in dialysis frequency - <b>Protocol adherence</b> | Proportion of patients who adhere to protocol dialysis frequency                                                                                                                                                                                                                                                  |
| The number of adverse and serious adverse events - <b>Safety of the study</b>                                      | Frequency of hospital admission due to hyperkalemia and fluid overload, and lower respiratory tract infection (LRTI)                                                                                                                                                                                              |
| An estimate of the effectiveness of the intervention - <b>Effect size</b>                                          | *Dialysis dose and residual kidney function as measured by Std Kt/V<br>*Rate of change (mean) of RKF in the first 6 and 12 months after randomisation.                                                                                                                                                            |
| Secondary Objectives                                                                                               | Secondary Outcome                                                                                                                                                                                                                                                                                                 |
| Retention of RKF                                                                                                   | Proportion of patients with interdialytic urea clearance $\geq 2$ and $\geq 3$ ml/min/1.73m <sup>2</sup> at 6 months.                                                                                                                                                                                             |
| Quality of life (QOL)                                                                                              | QOL is assessed using EQ-5D-5L questionnaire                                                                                                                                                                                                                                                                      |
| Mood – Depression                                                                                                  | Depression assessed using PHQ-9 questionnaire.                                                                                                                                                                                                                                                                    |
| Cognitive function                                                                                                 | Change in cognitive function as assessed by MOCA tool                                                                                                                                                                                                                                                             |
| Illness intrusiveness                                                                                              | Illness intrusiveness is assessed using Illness intrusiveness rating scale                                                                                                                                                                                                                                        |
| Functional status /Frailty                                                                                         | Functional status assessed by Clinical Frailty Score (CFS)                                                                                                                                                                                                                                                        |
| Vascular access failures or problems                                                                               | Frequency of vascular access failures and interventions                                                                                                                                                                                                                                                           |
| Major Adverse Cardiac Events (MACE)                                                                                | MACE is assessed by recording of the frequency of the events.                                                                                                                                                                                                                                                     |
| Survival                                                                                                           | Survival is measured by all-cause mortality                                                                                                                                                                                                                                                                       |

## Participants

All adult patients who have commenced HD in the previous 3 months will be considered for the study. Those who potentially meet the eligibility criteria after pre-screening by review of medical records including the requirement for a standard of care inter-dialytic urea clearance  $\geq 3\text{ml/min/1.73m}^2$  BSA will be eligible for study screening. Those consenting for the study will undergo formal screening to include confirmation of their meeting the eligibility criteria including having an inter-dialytic urea clearance  $\geq 3\text{ml/min/1.73m}^2$  BSA on retesting.

## Consent

Consent will be required prior to screening procedures and will include agreement to screening which includes confirmation of urea clearance  $\geq 3\text{ml/min/1.73m}^2$  BSA and an explicit consent to a protocol-driven dialysis regimen and to randomisation to incremental HD or standard thrice weekly HD arms.

## Inclusion Criteria:

- Age  $\geq 18$  years.
- Advanced kidney failure - established as a new starter on HD within the previous 3 months.
- RKF likely to permit twice weekly dialysis as defined by inter-dialytic urea clearance  $\geq 3\text{ml/min/1.73m}^2$  BSA measured routinely as part of standard care or as pre-screening.
- Sufficient understanding of the study procedures and requirements including capacity for explicit agreement to be randomised to standard or incremental HD regimens.

## Exclusion Criteria:

- Planned organ transplantation within 3 months from study screening.
- Anticipated requirement for high-volume ultrafiltration on dialysis (e.g. subjects with daily enteral or parenteral nutrition)
- Blood-borne virus positivity.
- Subjects unable to comply with requirement for monthly inter-dialytic urine collection.

- Pregnancy.
- Prognosis <12 months as judged by the Principal Investigator.

## Screening phase

At screening inclusion and exclusion criteria will be confirmed. Confirmation of inter-dialytic urea clearance  $\geq 3\text{ml/min/1.73m}^2$  BSA will be performed. Pregnancy test will be performed in females of child-bearing age to reduce chance of unexpected pregnancy occurring during the study which would require study withdrawal. Patients who, at screening, are eligible for study participation according to eligibility criteria, and who are confirmed to have a screening inter-dialytic urea clearance  $\geq 3\text{ml/min/1.73m}^2$  BSA will be eligible for randomisation. Subjects who fail screening will be eligible for re-screening one month later provided their screening urea clearance is  $>2\text{ml/min/1.73m}^2$  BSA and the rescreening time point remains within 3 months of dialysis initiation. At re-screening, a urea clearance  $\geq 3\text{ml/min/1.73m}^2$  BSA will be required for randomisation into the study.

## Randomisation

Web-based randomisation will be carried out by each centre using Qualtrics, supported by the Clinical Trials Support Network, University of Hertfordshire. Subjects will be randomised on a 1:1 basis to each study arm and each subject allocated a unique study ID.

## Study phase

Following randomisation, study subjects will be dialysed according to the protocol of their randomisation arm as per the schematic in Figure 1. Monthly quality assessment of dialysis in both arms will include a measure of dialysis clearance (Std  $\text{Kt/V}_{\text{Dialysis}}$ ). RKF will be measured monthly by urea clearance in both arms and converted to Std  $\text{Kt/V}_{\text{RKF}}$ .

In the standard dialysis arm, dialysis adequacy will be assessed only using the Std  $\text{Kt/V}_{\text{Dialysis}}$ . In the incremental dialysis arm, the adequacy will be assessed using a composite of dialysis clearance (Std  $\text{Kt/V}_{\text{Dialysis}}$ ) and RKF (Std  $\text{Kt/V}_{\text{RKF}}$ ) as detailed below. This composite is termed Std  $\text{Kt/V}_{\text{Dialysis+RKF}}$ . HD modes will remain standard throughout the study. Haemodiafiltration may be used where blood flow  $>250$  ml/min, otherwise high-flux HD will be used.

## Assessment of residual kidney function

There are two main methods of including residual kidney function in HD prescription. The first converts residual urea clearance to an equivalent dialysis sessional clearance[7]. The second converts sessional Kt/V to a weekly equivalent clearance. Both these allow the addition of dialysis and renal clearances. There are two variants of the second method: standard Kt/V[26] and the Casino-Lopez Equivalent renal urea clearance (EKR)[27]. Both these are urea clearance based. The ERBP guidelines recommend use of GFR (mean of urea and creatinine clearance) in the EKR equation rather than urea clearance which was intrinsic to originally derived equation. We have used standard Kt/V which takes a more conservative view of RKF since urea clearance is around 30% lower than GFR. Further details of the methodology for assessment of residual kidney function can be found in Supplementary Materials.

## Groups

### Control Group: Standard HD arm

Subjects in the standard HD arm will be dialysed to target minimum Std Kt/V<sub>Dialysis</sub> of 2 per week. Subjects will be dialysed after randomisation initially for 3.5-4 hours thrice weekly. Dialysis dose will be adjusted using standard measures including maximising blood flow, dialysis time, membrane surface area and improving vascular access. Reduction in dialysis frequency will not be permitted.

### Interventional Group: Incremental HD arm

Subjects randomised to the incremental HD arm will be dialysed to a target minimum Std Kt/V<sub>Total</sub> (Std Kt/V<sub>dialysis</sub> + Std Kt/V<sub>RKF</sub>) of 2 per week. Following randomisation dialysis will be initiated twice weekly, with a session duration of 3.5-4 hours. If Std Kt/V<sub>Total</sub> exceeds the minimum target, clinicians will be permitted to reduce dialysis duration provided the target level is still achieved. If Std Kt/V<sub>Total</sub> does not meet the target, clinicians will be permitted to increase dialysis dose by optimising dialysis clearance (membrane selection, blood flow, vascular access, increasing dialysis time or frequency). Clinicians will also be permitted to increase the dialysis frequency to thrice-weekly or greater if required. The main trigger for

1  
2  
3 this will be failure to meet minimum adequacy targets but clinicians will have the freedom to  
4 make this transition on other clinical grounds including hyperkalaemia and fluid overload. The  
5 reasons for switching from twice to thrice weekly will be recorded. Hyperkalaemia and fluid  
6 overload are also captured as Serious Adverse Events.  
7  
8  
9

### 10 11 12 Deviations to study protocol

13  
14 If subjects are admitted to hospital, efforts will be made to maintain adherence to the dialysis  
15 protocol. However, during admissions, modifications to the dialysis prescription, which  
16 include increasing dialysis frequency, are permitted in the interests of patient safety. These  
17 will be recorded as protocol deviations.  
18  
19  
20  
21  
22

23  
24 In the event of subjects in the incremental HD arm not providing inter-dialytic urine samples  
25 for calculation of Standard  $Kt/V_{\text{Renal}}$  for two consecutive months, the subject will be advised  
26 to dialyse thrice weekly and will remain in the study with target Standard  $Kt/V_{\text{Dialysis}} > 2$  (i.e.  
27 assuming RRF is zero), until an inter-dialytic urine collection is provided. Additional study visits  
28 may be performed if necessary following hospital admission, holiday or non-adherence to  
29 treatment schedule.  
30  
31  
32  
33  
34

### 35 36 37 Procedures to avoid loss from follow up or study withdrawal

38  
39 The patient information sheet and consent form will draw attention to the requirement for  
40 patients to agree that their dialysis regimen and frequency will be adjusted according to the  
41 study protocol.  
42  
43  
44  
45

46  
47 For patients wishing to withdraw consent, the investigator will explore with the patient the  
48 reasons for wishing to withdraw. In patients who wish to withdraw because they are unable  
49 to tolerate the intensity, frequency or duration of dialysis, the investigator will be permitted  
50 to offer to the patient to remain in the study with reduced dialysis intensity according to  
51 clinical judgement and record this as a protocol deviation (intention-to-treat approach).  
52 Patients who withdraw will be encouraged to remain in the study for the purpose of outcome  
53 data collection including measurement of RKF.  
54  
55  
56  
57  
58  
59  
60

## Data Collection

Data will be collected by the research team members at baseline and then monthly thereafter for 12 months. Table 2 summarises study assessments during the study and study time points.

*Table 2 Schedule of events.*

\*Patients who fail screening will be eligible for re-screening one month later provided their screening urea clearance is  $>2\text{ml/min/1.73m}^2$  BSA and the rescreening time point remains within 3 months of HD initiation.

\*\* Dialysis adequacy can be calculated using either PostHD1 Urea, PreHD2 Urea, PostHD2 Urea or optionally using PreHD1 Urea, PostHD1 Urea, PreHD2 Urea.

|                                                                                                            | Study Period    |                        |             |
|------------------------------------------------------------------------------------------------------------|-----------------|------------------------|-------------|
|                                                                                                            | Pre-screening   | Baseline/Screening     | Visit 1-12  |
| <b>Months</b>                                                                                              | <b>-12 to 0</b> | <b>0</b>               | <b>1-12</b> |
| <b>Study Procedures/Assessments</b>                                                                        |                 |                        |             |
| Consent                                                                                                    |                 | X                      |             |
| Inclusion/Exclusion Criteria                                                                               | X               | X                      |             |
| Demographics, Medical History, Physical examination, Height                                                |                 | X                      |             |
| Randomisation                                                                                              |                 | X                      |             |
| Rescreening*                                                                                               |                 | X                      |             |
| Concomitant medications -Diuretics, Erythropoietin Stimulating Agents, Antihypertensive, Phosphate Binders |                 | X                      | X           |
| Monthly dialysis blood tests                                                                               |                 | X                      | X           |
| Monthly dialysis Adequacy assessments                                                                      |                 | X                      | X           |
| Pre HD1 Urea, Post HD1 Urea, Pre HD2 Urea, Post HD2 Urea**                                                 | X               | X                      | X           |
| Inter-dialytic urine collection for Urea & Creatinine Clearance measurement                                |                 | X                      | X           |
| Frozen samples for $\beta$ -2 Microglobulin & $\beta$ Trace Protein                                        |                 | X                      | X           |
| Bioimpedence measurement                                                                                   |                 | X                      | X           |
| <b>Safety Assessments</b>                                                                                  |                 |                        |             |
| Adverse Events, Serious Adverse Events, MACE, End points                                                   |                 |                        | X           |
| <b>Questionnaires</b>                                                                                      |                 |                        |             |
| EQ-5D-5L, IIRS, PHQ9, MoCA, CFS                                                                            |                 | <b>Months 0, 6, 12</b> |             |

## Measurement of dialysis adequacy

Details of the method of measuring dialysis adequacy are provided in supplementary materials. The dialysis dosing adjustment will be carried out monthly using Std Kt/V calculated by this method. For patients dialysing thrice weekly (Monday/Wednesday/Friday or Tuesday/Thursday/Saturday) the Monday/Tuesday session is considered to be session 1 of the week (HD1) and the Wednesday/Thursday session is considered session 2 of the week (HD2). For patients dialysing twice weekly (Monday/Friday or Tuesday/Saturday) the Friday/Saturday is considered HD1 and the Monday/Tuesday HD2. Blood and urine samples to be taken are shown in Table 2 (Schedule of Events) and in Figure 2. The urine collection and measurement of RKF is performed from HD1 to HD2 and will be calculated from post-HD1 and pre-HD2 serum urea/creatinine, urine volume and urine urea/creatinine concentration as per the equations in the Supplementary Material. The measurement of dialysis dose is calculated from dialysis session data (pre- and post-weight HD2 weight, Watson Volume, pre- and post HD2 urea and dialysis session duration (Td) (see Supplementary Material for calculation procedure).

Urine collection will consequently be over approximately three days for twice weekly patients and two days for thrice weekly patients. Although there is a small risk of bias due to longer duration urine collections for twice weekly HD patients, this is likely to be balanced by the incentive for these patients to provide complete urine collections to ensure their dialysis intensity is not increased.

## Sample size

Retrospective studies suggest that decline of RKF may be attenuated in patients who receive twice weekly dialysis compared to thrice weekly, and that this effect occurs early such that a difference in RKF at 6 months is likely to be an optimal time point for the basis of a power analysis. Our initial power analysis, based on our own retrospective data[28] indicated an effect size (Cohen's d) of 0.37 calculated from mean and standard deviations of urea clearance slopes in the first 6 months after HD initiation between two groups of patients, one initiating

1  
2  
3 HD twice weekly and the other thrice weekly. Based on this, the sample size for the proposed  
4 definitive RCT would be 180 (90 each arm). If the definitive study were to be carried out using  
5 the same 4 centres, the available incident HD population would be around 600 annually or  
6 1200 over a proposed 2 year recruitment period. We anticipate that 40% of these patients  
7 will meet the eligibility criteria ie 480 patients. To achieve 180 analysable patients at 6 months  
8 following randomisation we will need to recruit 50% of eligible patients assuming a retention  
9 rate of 75% over 6 months.  
10  
11  
12  
13  
14  
15  
16

17 This feasibility study will test these assumptions on effect size, the proportion of incident  
18 patients who can be pre-screened who are eligible to be approached for study consent, the  
19 proportion of patients approached for screening who consent, pass formal screening and  
20 undergo randomisation (recruitability), and the retention rate during the 6 months after  
21 randomisation (retainability). Sample sizes between 24 and 50 have been recommended for  
22 feasibility studies [29, 30]. Initially we chose a sample size of 50 but, because of a higher than  
23 anticipated recovery of renal function in the first few weeks of recruitment, increased this to  
24 54. A sample of this size will enable us to estimate eligibility, recruitability, screen-failure rate  
25 and retainability rate to within a 95% confidence interval of +/- 11-14%.  
26  
27  
28  
29  
30  
31  
32  
33  
34

### 35 Adverse events (AE) and Serious Adverse Events (SAE)

36 All AE will be recorded in an AE log. SAEs will be reported to the CI and sponsors within 24 h  
37 of the research team becoming aware of the event. For the purpose of this study, SAE which  
38 result in death, hospitalisation, MACE, infections requiring antibiotic use, episodes of fluid  
39 overload needing resetting of dry weight, episodes of hyperkalemia (potassium level > 6.5  
40 mmol/L), vascular access events (tunnelled line failures, tunnelled line infections, fistula  
41 thrombosis, fistula stenosis, false aneurysm) will be captured.  
42  
43  
44  
45  
46  
47  
48  
49

### 50 Data Analysis

51 The primary outcome is to evaluate the feasibility of conducting an RCT comparing the effect,  
52 on RKF decline, of incremental and conventional approaches to HD initiation. The study will  
53 be analysed as intention-to-treat. In order to estimate the study power for a future large scale  
54 RCT, estimates of change in RKF in the first 6 and 12 months after dialysis initiation will be  
55 determined.  
56  
57  
58  
59  
60



1  
2  
3  
4  
5 Change in RKF will be determined using several methods. We will calculate, using linear  
6 regression analysis for individual subjects, rate of decline in GFR (mean of urea and creatinine  
7 clearance) for individual subjects and compare means of these rates between incremental  
8 and conventional HD groups with a t test if normally distributed. This effect size will be  
9 important in powering future definitive trials. Using a previously described method we will  
10 employ a mixed effects model to compare rate of decline in GFR between randomisation  
11 groups[28]. As an indicator of RKF, we will compare urine volume data between groups using  
12 similar statistical techniques to the above. We will also compare proportions of patients in  
13 the two groups who have a residual interdialytic urea clearance  $\geq 2$  and  $\geq 3$  ml/min/1.73m<sup>2</sup>  
14 at 6months. In addition, we will estimate RKF (GFR) from monthly measured pre-dialysis  
15 middle molecule concentrations of  $\beta$  trace protein and  $\beta$ 2-microglobulin converted to an  
16 equivalent GFR using the algorithm reported by Wong et al[31]. We will calculate rate of  
17 decline in GFR for individual patients from these middle molecule concentrations and using  
18 regression analysis for individual patient data to determine GFR slope and will compare mean  
19 slope between incremental HD and standard care groups..  
20  
21  
22  
23  
24  
25  
26  
27  
28  
29  
30  
31  
32  
33

34 Data from the EQ-5D-5L, PHQ-9, MoCA, IIRS and CFS will be compared between study arms  
35 with repeated measures parametric or non-parametric tests as appropriate (repeated  
36 measures ANOVA or Friedman tests). Comparison of MACE, vascular access events (access  
37 failure, access intervention, access related infections, fistula stenosis and fistula thrombosis),  
38 hyperkalaemic episodes, fluid overload episodes and lower respiratory tract infection  
39 episodes will be compared between groups using time-to-event analysis by the Nelson-Aalen  
40 approach.  
41  
42  
43  
44  
45  
46  
47  
48  
49

## 50 Discussion

51 Clinical practise guidelines for HD adequacy, update 2006 [32] suggests that reduction of  
52 treatment frequency to less than thrice-weekly should only be considered in patients with  
53 inter-dialytic urea clearance  $>2$ ml/min/1.73m<sup>2</sup> since urea kinetic modelling simulations have  
54 shown that when residual urea clearance is less than this, it is not possible to achieve a weekly  
55 standard Kt/V of 2.0 with twice-weekly dialysis regimens. Hence in this study we have opted  
56  
57  
58  
59  
60

1  
2  
3 for a required inter-dialytic urea clearance (RKF) of  $\geq 3\text{ml/min/1.73m}^2$  BSA prior to  
4 randomisation as an inclusion criterion to provide a safety margin.  
5  
6  
7

8  
9 There are a large number of observational studies [5-18] that compare clinical outcomes of  
10 patients treated with twice-weekly HD with those on conventional thrice-weekly HD regimens  
11 but to date no RCT that compare clinical outcomes of incremental or infrequent HD versus  
12 conventional thrice-weekly HD have been published. Though these studies suggest that the  
13 rate of decline of RKF is slower using infrequent and incremental HD regimens but  
14 prospective, randomised data is not available. Hence it is unclear to what extent the benefits  
15 of incremental and infrequent HD are due to patient selection. Similarly, there are no  
16 comparative data on Quality of Life measures or on patient experience in conventional versus  
17 incremental HD. Mortality risk and survival outcomes have not been reported to be worse in  
18 patients treated with twice-weekly dialysis sessions [9, 13, 16] and a large US study found that  
19 mortality risk was lower in prevalent patients treated with twice-weekly HD, provided there  
20 was adequate RKF [5]. Hence there is a need for a definitive trial of incremental versus  
21 conventional dialysis initiation to define the effects on RKF preservation and patient-reported  
22 outcome and experience.  
23  
24  
25  
26  
27  
28  
29  
30  
31  
32  
33  
34  
35

36 The outcome data of this current study will be used to inform the design of such a future  
37 definitive study. The proposed feasibility study will test assumptions around the effect size,  
38 the eligibility for screening, recruitability, and retainability. Deviations from the assumed  
39 values will alter the design of the definitive study eg number of centres required, eligibility  
40 criteria, primary outcome measure, sample size, and may indicate that a definitive study is  
41 non-viable.  
42  
43  
44  
45  
46  
47

48 It is likely that the outcomes of a definitive study will be important, not only in defining the  
49 potential benefit of incremental HD for patients, but in establishing whether such an  
50 approach may allow optimization of resource use. If dialysis intensity can be reduced for  
51 patients with sufficient RKF with patient benefit, this will liberate dialysis resources that may  
52 permit other patients with high dialysis requirements to dialyse more frequently.  
53  
54  
55  
56  
57  
58  
59  
60

## Acknowledgements

The authors are grateful for the British Kidney Patient Association & British Renal Society Joint Grants Programme for funding this study and for the assistance of our patients in the study design.

## Competing interests

The authors declare that they have no competing interests. This report is independent research funded by the British Kidney Patient Association & British Renal Society Joint Grants Programme. The views expressed in this publication are those of the authors.

## Author's contributions

Design of the study and the development of the protocol: EV, RMKK, KF, SS

Trial set up and running of the study, trial governance, data integrity monitoring: EV, DW

Data analysis: EV, RMKK, KF, DW

Principal Investigators: EV, JB, AD, BA

All authors are involved in the steering group of the study and in the analysis and interpretation of the data.

All authors read and approved the final manuscript.

## Abbreviations

**AEs:** Adverse Events

**CFS:** Clinical Frailty Score

**CI:** Chief Investigator

**CRFs:** Case Report Forms

**EQ-5D-5L:** EuroQol - 5D-5L

**ESRD:** End Stage Renal Disease

**HD:** Haemodialysis

**IIRS:** Illness Intrusiveness Rating Scale

**Kt/V:** Urea Clearance normalised to total body water

**MACE:** Major Adverse Cardiac Events

**MoCA:** Montreal Cognitive Assessment

**PHQ-9:** Patient Health Questionnaire 9

**PI:** Principal Investigator

**RCT:** Randomised Controlled Trial

**RKF:** Residual Kidney Function

**SAEs:** Serious Adverse Events

**SUSAR:** Suspected Unexpected Serious Adverse Reaction

1  
2  
3 **Legends to Figures**  
4  
5  
6  
7

8 **Figure 1.** Flow diagram of clinical trial demonstrating data that will be used to calculate eligibility for  
9 screening, screen failure rate, recruitability and retainability.

10  
11 **Figure 2.** Timing of urine collection and blood tests for dialysis adequacy measurement for patients  
12 on twice weekly and thrice weekly HD.  
13  
14  
15  
16  
17  
18  
19  
20  
21  
22  
23  
24  
25  
26  
27  
28  
29  
30  
31  
32  
33  
34  
35  
36  
37  
38  
39  
40  
41  
42  
43  
44  
45  
46  
47  
48  
49  
50  
51  
52  
53  
54  
55  
56  
57  
58  
59  
60

For peer review only

## REFERENCES

1. Kalantar-Zadeh, K., et al., *Twice-weekly and incremental hemodialysis treatment for initiation of kidney replacement therapy*. Am J Kidney Dis, 2014. **64**(2): p. 181-6.
2. Davenport, A., *Will incremental hemodialysis preserve residual function and improve patient survival?* Semin Dial, 2015. **28**(1): p. 16-9.
3. Wong, J., et al., *Incremental haemodialysis*. Nephrol Dial Transplant, 2015. **30**(10): p. 1639-48.
4. Gilmore, J., *KDOQI clinical practice guidelines and clinical practice recommendations--2006 updates*. Nephrol Nurs J, 2006. **33**(5): p. 487-8.
5. Hanson, J.A., et al., *Prescription of twice-weekly hemodialysis in the USA*. Am J Nephrol, 1999. **19**(6): p. 625-33.
6. Lin, Y.F., et al., *Comparison of residual renal function in patients undergoing twice-weekly versus three-times-weekly haemodialysis*. Nephrology (Carlton), 2009. **14**(1): p. 59-64.
7. Vilar, E., et al., *Residual renal function improves outcome in incremental haemodialysis despite reduced dialysis dose*. Nephrol Dial Transplant, 2009. **24**(8): p. 2502-10.
8. Supasyndh, O., et al., *Nutritional status of twice and thrice-weekly hemodialysis patients with weekly Kt/V > 3.6*. J Med Assoc Thai, 2009. **92**(5): p. 624-31.
9. Lin, X., et al., *Clinical outcome of twice-weekly hemodialysis patients in shanghai*. Blood Purif, 2012. **33**(1-3): p. 66-72.
10. Milagros Fernandez Lucas, J.L.T., Gloria Ruiz-Roso, Martha Diaz, Viviana Raoch, Fernando Caravaca, Carlos Quereda, *Incremental Hemodialysis Schedule in Patients with Higher Residual Renal Function at the Start of Dialysis*. Advances in Nephrology, 2014. **2014**: p. 6.
11. Zhang, M., et al., *Association of initial twice-weekly hemodialysis treatment with preservation of residual kidney function in ESRD patients*. Am J Nephrol, 2014. **40**(2): p. 140-50.
12. Bieber, B., et al., *Two-times weekly hemodialysis in China: frequency, associated patient and treatment characteristics and Quality of Life in the China Dialysis Outcomes and Practice Patterns study*. Nephrol Dial Transplant, 2014. **29**(9): p. 1770-7.
13. Elamin, S. and H. Abu-Aisha, *Reaching target hemoglobin level and having a functioning arteriovenous fistula significantly improve one year survival in twice weekly hemodialysis*. Arab J Nephrol Transplant, 2012. **5**(2): p. 81-6.
14. Cheng, Y., et al., *Risk of cardiovascular disease in patients on thrice-weekly versus twice-weekly hemodialysis*. Int J Cardiol, 2014. **174**(3): p. 780-3.
15. Lei, G., et al., *Risk of intradialytic hypotension in patients on thrice-weekly versus twice-weekly hemodialysis*. Int J Cardiol, 2014. **174**(3): p. 821-3.
16. Panaput, T., et al., *Dialysis dose and risk factors for death among ESRD patients treated with twice-weekly hemodialysis: a prospective cohort study*. Blood Purif, 2014. **38**(3-4): p. 253-62.
17. Obi, Y., et al., *Incremental Hemodialysis, Residual Kidney Function, and Mortality Risk in Incident Dialysis Patients: A Cohort Study*. Am J Kidney Dis, 2016. **68**(2): p. 256-265.
18. Caria, S., et al., *The incremental treatment of ESRD: a low-protein diet combined with weekly hemodialysis may be beneficial for selected patients*. BMC Nephrol, 2014. **15**: p. 172.
19. Fernandez-Lucas, M., et al., *Maintaining residual renal function in patients on haemodialysis: 5-year experience using a progressively increasing dialysis regimen*. Nefrologia, 2012. **32**(6): p. 767-76.
20. Devins, G.M., *Using the illness intrusiveness ratings scale to understand health-related quality of life in chronic disease*. J Psychosom Res, 2010. **68**(6): p. 591-602.
21. Herdman, M., et al., *Development and preliminary testing of the new five-level version of EQ-5D (EQ-5D-5L)*. Qual Life Res, 2011. **20**(10): p. 1727-36.
22. Nasreddine, Z.S., et al., *The Montreal Cognitive Assessment, MoCA: a brief screening tool for mild cognitive impairment*. J Am Geriatr Soc, 2005. **53**(4): p. 695-9.

- 1  
2  
3  
4  
5  
6  
7  
8  
9  
10  
11  
12  
13  
14  
15  
16  
17  
18  
19  
20  
21  
22  
23  
24  
25  
26  
27  
28  
29  
30  
31  
32  
33  
34  
35  
36  
37  
38  
39  
40  
41  
42  
43  
44  
45  
46  
47  
48  
49  
50  
51  
52  
53  
54  
55  
56  
57  
58  
59  
60
23. Tiffin-Richards, F.E., et al., *The Montreal Cognitive Assessment (MoCA) - a sensitive screening instrument for detecting cognitive impairment in chronic hemodialysis patients*. PLoS One, 2014. **9**(10): p. e106700.
  24. Moorhouse, P. and K. Rockwood, *Frailty and its quantitative clinical evaluation*. J R Coll Physicians Edinb, 2012. **42**(4): p. 333-40.
  25. Alfaadhel, T.A., et al., *Frailty and mortality in dialysis: evaluation of a clinical frailty scale*. Clin J Am Soc Nephrol, 2015. **10**(5): p. 832-40.
  26. Gotch, F.A., *The current place of urea kinetic modelling with respect to different dialysis modalities*. Nephrol Dial Transplant, 1998. **13** Suppl 6: p. 10-4.
  27. Casino, F.G. and T. Lopez, *The equivalent renal urea clearance: a new parameter to assess dialysis dose*. Nephrol Dial Transplant, 1996. **11**(8): p. 1574-81.
  28. Kaja Kamal, R.M., et al., *Initiating haemodialysis twice-weekly as part of an incremental programme may protect residual kidney function*. Nephrol Dial Transplant, 2019. **34**(6): p. 1017-1025.
  29. Julious, S.A., *Sample size of 12 per group rule of thumb for a pilot study*. Pharmaceut. Statist., 2005. **4**: p. 287-291.
  30. Sim, J. and M. Lewis, *The size of a pilot study for a clinical trial should be calculated in relation to considerations of precision and efficiency*. J Clin Epidemiol, 2012. **65**(3): p. 301-8.
  31. Wong, J., et al., *Predicting residual kidney function in hemodialysis patients using serum beta-trace protein and beta2-microglobulin*. Kidney Int, 2016. **89**(5): p. 1090-1098.
  32. Hemodialysis Adequacy Work, G., *Clinical practice guidelines for hemodialysis adequacy, update 2006*. Am J Kidney Dis, 2006. **48** Suppl 1: p. S2-90.

1  
2  
3  
4  
5  
6  
7  
8  
9  
10  
11  
12  
13  
14  
15  
16  
17  
18  
19  
20  
21  
22  
23  
24  
25  
26  
27  
28  
29  
30  
31  
32  
33  
34  
35  
36  
37  
38  
39  
40  
41  
42  
43  
44  
45  
46  
47  
48  
49  
50  
51  
52  
53  
54  
55  
56  
57  
58  
59  
60

For peer review only



1  
2  
3  
4  
5  
6 Enrolment  
7  
8  
9  
10  
11  
12 Allocation  
13  
14  
15  
16  
17  
18  
19  
20  
21  
22  
23  
24  
25  
26  
27 Follow-up  
28  
29  
30  
31  
32  
33  
34  
35  
36  
37  
38 Analysis  
39  
40  
41  
42  
43  
44  
45  
46  
47  
48

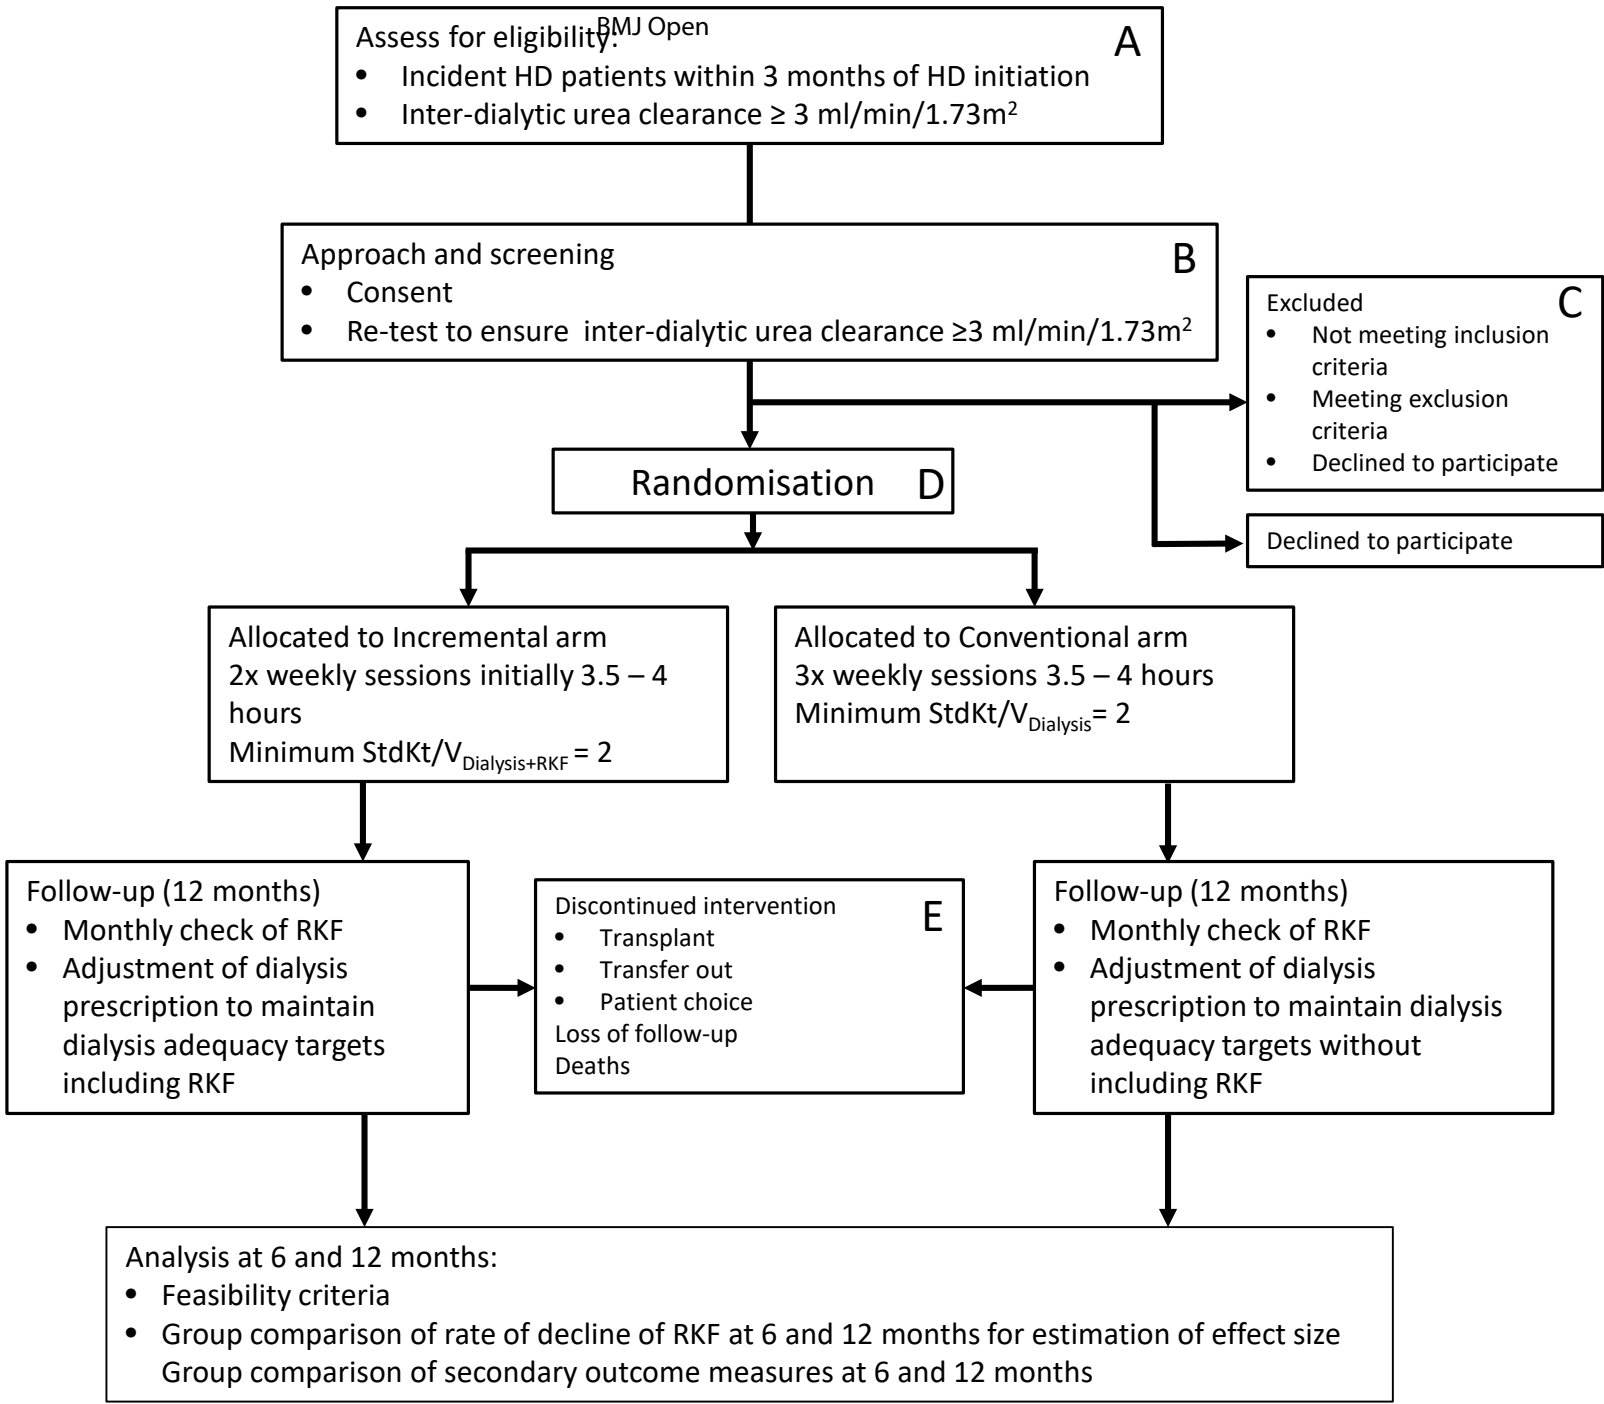

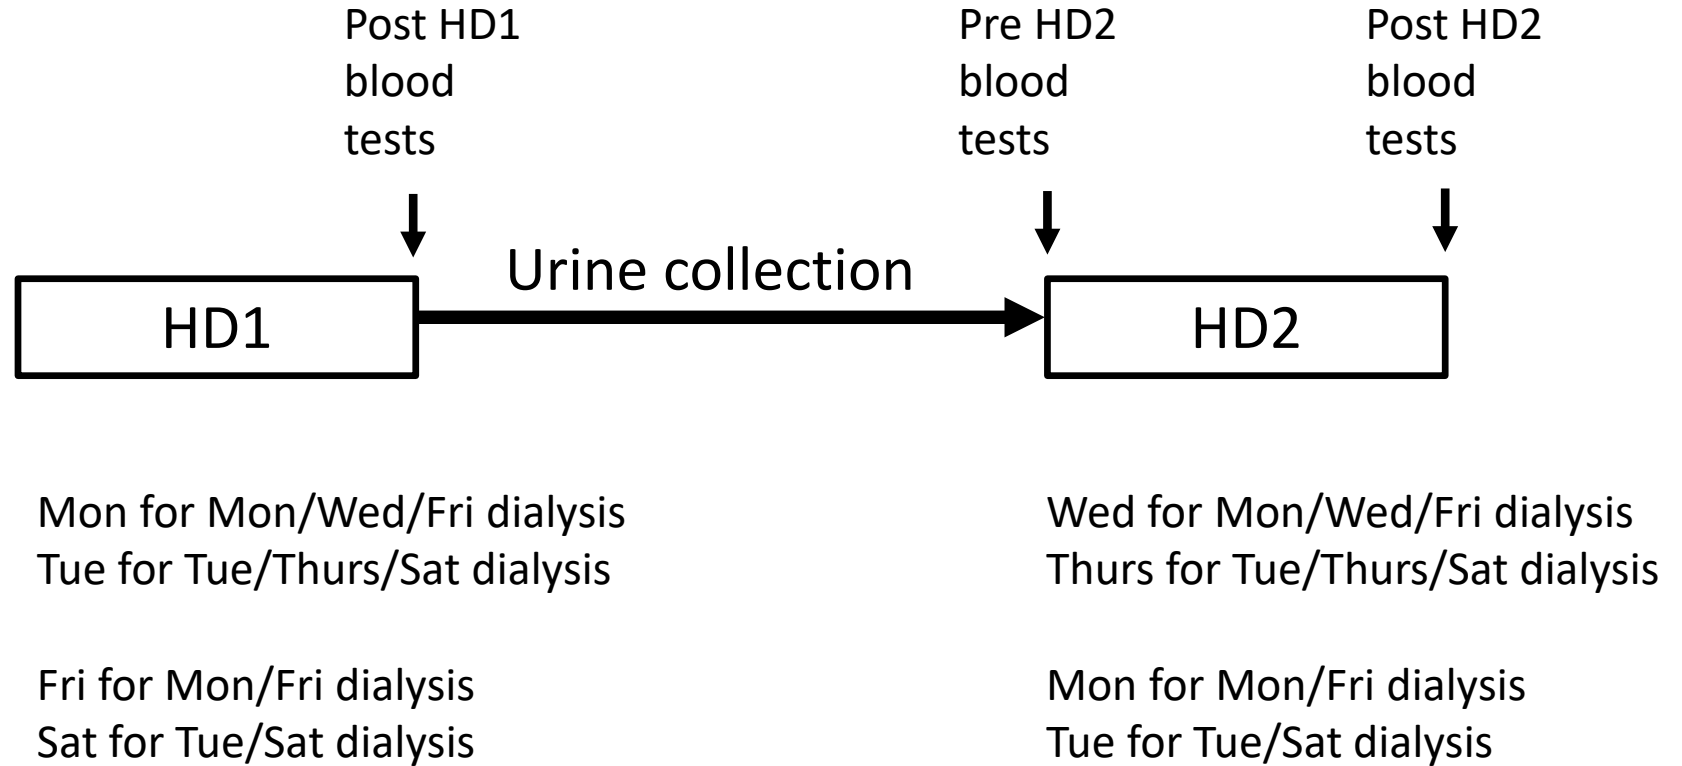

1  
2  
3  
4  
5  
6  
7  
8  
9  
10  
11  
12  
13  
14  
15  
16  
17  
18  
19  
20  
21  
22  
23  
24  
25  
26  
27  
28  
29  
30  
31  
32  
33  
34  
35  
36  
37  
38  
39  
40  
41

## Supplementary material

### Method of calculation of dialysis standard Kt/V taking into account ultrafiltration weight (Daugirdas methodology)

STEP 1: Calculate spKt/V not taking into account fluid removal

$$spKt/V = \ln \left( \frac{C_{pre}}{C_{post}} \right) \quad (\text{EQUATION 1})$$

Where  $C_{pre}$  is urea concentration pre-dialysis and  $C_{post}$  is urea concentration post dialysis

STEP 2: Calculate eKt/V not taking into account fluid removal using Tattersall transformation

In this calculation the Tattersall time constant is modified from 35 mins to 30.7mins as per modifications recommended by Daugirdas (Kidney International (2010) 77, 637–644)

$$eKt/V = spKt/V \text{ from step 1} * \frac{\left(\frac{Td}{60}\right)}{(Td \times 60 + 30.7)} \quad (\text{EQUATION 2})$$

Where  $Td$  is dialysis duration expressed in hours

STEP 3: Calculate Adjusted Watson Volume

Watson  $V$  needs to be downsized by 10% to account for higher modelled  $V$  compared to anthropometric Watson  $V$  (Daugirdas Kidney International (2010) 77, 637–644).

Calculate Watson Volume by standard equation and downgrade by 10%

$$\text{Adjusted Watson } V = \text{Watson } V * 0.9 \quad (\text{EQUATION 3})$$

STEP 4: Calculate Leypoldt standard Kt/V

In this we employ eKt/V from equation 2. This equation for standard Kt/V does not account for UF volume. Leypoldt equation is as below (Leypoldt JK. Hemodial Int 2004; 8: 193–197. and Daugirdas Kidney International (2010) 77, 637–644):

$$stdKt/V = \frac{10,080 \frac{1 - e^{-eKt/V}}{t}}{\frac{1 - e^{-eKt/V}}{eKt/V} + \frac{10,080}{Ft} - 1} \quad (\text{EQUATION 4})$$

Where f=frequency, t=dialysis time, eKt/V is results from **Equation 2**

STEP 5: Calculate Standard Kt/V taking into account UF weight using Daugirdas methodology:

$$stK_d t/V = S / (1 - (0.74/F) \cdot UF_w/V) \quad (\text{EQUATION 5})$$

(equation 2 from Daugirdas et al, Kidney International (2010) 77, 637–644)

where S=StdKt/V from EQUATION 4, F=frequency (sessions/week), UF<sub>w</sub>=weekly fluid gain between HD sessions, V=adjusted Watson V from **Equation 3**

### CALCULATION OF RESIDUAL RENAL FUNCTION STANDARD Kt/V

STEP 1: Calculate Urea clearance

$$\text{Urea clearance} = \frac{\text{UrineVol} \times 1000 \times \text{UreaUrea}}{\left( \frac{\text{UrineDuration} \times 24 \times 60 - (\text{Td} \times 60)}{2} \right) \left( \frac{\text{PostUrea} + \text{PreUrea}}{2} \right)} \quad (\text{EQUATION 6})$$

Where urea clearance units are ml/min, UrineVol=urine volume (L), UrineUrea=urine urea concentration (mmol/L), UrineDuration=Urine collection duration (whole days between HD session), Td=dialysis duration (hours), PostUrea=Blood urea concentration at end of HD when urine collection starts (mmol/L), PreUrea= Blood urea concentration at start of HD when urine collection ends (mmol/L).

This equation assumes that dialysis is occurring at regular time points and utilises duration of urine collection as days between HD sessions minus dialysis duration.

Step 2: Calculate urea clearance corrected for body surface area (used for screening process of study but not for calculation of Std Kt/V which uses unadjusted urea clearance

BSA=Dubois BSA (m<sup>2</sup>)

$$\text{BSA} = 0.007184 * \text{Height in cm}^{0.725} * \text{Weight in Kg}^{0.425} \quad (\text{EQUATION 7})$$

$$\text{Urea clearance adjusted for BSA} = \text{Urea clearance} * 1.73/\text{BSA} \quad (\text{EQUATION 8})$$

Step 3: Calculate Adjustment factor needed to downgrade urea clearance so it can be used to calculate Standard Kt/V

This method applies a multiplier to Urea Clearance to downgrade it so that it is appropriately incorporated into the Standard Kt/V calculation (fkru=approximately 0.7, or 70%)

$$fKrU = \frac{0.974}{(spKt/V + 1.62) + 0.4} \quad \text{(EQUATION 9)}$$

(from Daugirdas Kidney International (2010) 77, 637–644). SpKt/V is that from **Equation 1**

Step 4: Adjust Urea clearance for incorporation into Standard Kt/V

$$\text{Adjusted KrU} = \text{Urea clearance} * fKrU \quad \text{(EQUATION 10)}$$

Where Urea clearance is from equation 6 and fKrU is from **equation 9**

From equation 4 in Daugirdas, Kidney International (2010) 77, 637–644

Step 5: Calculate Residual Renal Function equivalent Standard Kt/V

This is calculated as  $K * t / V$  where  $K = \text{adjusted KrU}$ ,  $t = \text{minutes in 7 days}$ ,  $V = \text{Adjusted Watson Volume}$

$$\text{Residual Renal Standard Kt/V} = \frac{\text{Adjusted KrU} \times 10080}{\text{Adjusted Watson Volume} \times 1000} \quad \text{(EQUATION 11)}$$

from equation 5 in Daugirdas Kidney International (2010) 77, 637–644

Where Adjusted KrU is from equation 10 (ml/min) and Adjusted Watson Volume (L) is from **Equation 3** above.

## Participant Information Sheet

### **Does incremental initiation of haemodialysis preserve native kidney function? A multicentre feasibility randomised controlled trial.**

You are being invited to take part in a research study. Before you decide, it is important that you understand why the research is being done and what it will involve. Please take time to read the following information carefully and discuss it with friends, relatives, your GP or staff on the Renal Unit if you wish. Ask us if there is anything that is not clear, or if you would like more information. Take time to decide whether or not you wish to take part.

#### **What is the purpose of the study?**

Patients who start haemodialysis usually retain some natural kidney function for months or years after starting dialysis. Even a small amount of this natural kidney function can be helpful in reducing the need for dietary and fluid restriction. There is also good evidence that retaining a small amount of natural kidney function may provide a survival benefit for patients on dialysis.

Most patients who commence haemodialysis start three times per week for 3.5-4 hours per session, irrespective of the amount of natural kidney function they may have. An alternative approach used in some kidney units is to take account of the natural kidney function in prescribing the amount of dialysis. This may allow patients to start treatment needing to spend less time on dialysis or even to start just twice weekly. The amount of dialysis can be adjusted over time as natural kidney function declines. This is called "incremental haemodialysis". Both of these approaches are considered to be standard care although it is not known which approach is more beneficial to patients.

There are some suggestions that the frequency of dialysis may influence the rate of decline of natural kidney function but this need to be tested in a large randomised study. To inform the design of such a study, a smaller scale feasibility study is required.

We intend to randomise fifty new starters on haemodialysis with adequate natural kidney function into two groups – a group who will have dialysis prescribed in the standard fashion – three times weekly for 3.5-4 hours per session or a group who will have an incremental start beginning with twice weekly treatment. We will investigate how many patients have sufficient natural kidney function to be eligible, whether patients are willing to participate and continue in the study, compare the rate of loss of kidney function between groups, and ascertain whether this individualised dialysis approach is less intrusive to patients. The results will be used to design a larger definitive study.

### **Why have I been asked to participate?**

You have been invited to participate as you are on a haemodialysis programme within the United Kingdom.

### **Do I have to take part?**

It is up to you to decide whether or not to take part. If you do decide to take part you will be given this information sheet to keep, and be asked to sign a consent form. If you decide to take part you are still free to withdraw at any time and without giving a reason. This would not affect the standard of care you receive.

### **What will happen to me if I take part?**

If you decide to take part we will need your permission for the local research nurse and consultant nephrologist to look at your medical records. If you are a female of child bearing age we will need to ensure you are not pregnant with a pregnancy test. You will be randomly allocated to one of two study groups. The amount of dialysis you receive (frequency and time) will depend on which study group you are randomised to.

If you are randomised to standard three times a week dialysis (3.5-4h), then you will be requested to have dialysis using that schedule.

If you are randomised to have incremental dialysis, you will dialyse twice weekly initially and afterwards the amount of dialysis you receive will be then adjusted according to the amount of natural kidney function you have. This may mean increasing the amount of time on dialysis up to 4 hours, or increasing to three times a week dialysis during the study.

We will arrange for a blood sample to be taken for the study at the beginning and end of a dialysis session every month with your routine monthly blood tests. The samples will be securely stored in the laboratory for further analysis of blood markers that indicate level of natural kidney function. We will also measure your weight and blood pressure as part of dialysis care. We will ask you to collect all of your urine in a special container between two consecutive dialysis sessions every month.

You will be asked to complete a series of questionnaires in regards to your health and wellbeing before starting the study, visit 6 and end of the study.

We will also monitor you regularly in regards to fluid status, potassium level, dialysis requirements.

During the study we will see you prior to the study and each month to assess your dialysis quality (total of 13 times). We will see you during a dialysis session for your convenience.

### **What are the possible benefits of taking part?**

It is unknown whether dialysis three times a week or in an individualised way (incremental dialysis) is best to preserve natural kidney function and we hope that this study will give us this information. It may be that you are randomised to a study group which benefits you from this perspective but it is not possible to be certain of this. There are no other direct benefits to you of taking part but it is hoped that information we get from this study may help us in the future to improve treatment for patients on dialysis.

### **What happens when the research study stops?**

At the end of the research, your medical care will continue as usual.

### **What will happen if I don't want to carry on with the study?**

You may withdraw from the study at any time, without having to explain why, and we will completely respect your decision. If you withdraw from the study, no other samples will be collected from you and we will not contact you again. Information already collected would be retained and used in the study with your consent. The samples which were already collected and the data collected would be used in the study with your consent. If you wish us not to use the information we will respect it. Your clinical care will not be affected by either taking part or by your withdrawal from the study.

### **Are there any risks to me?**

Only patients with an appropriate natural kidney function are recruited into this study to minimise any potential risks such as inadequate dialysis, fluid overload, and high potassium levels. All recruited participants will be closely monitored at least once a month to check for the above risks. Any concerns from participants or haemodialysis staff will be addressed promptly.

As part of the research study, a small blood sample (~20ml, 4 teaspoons) will be required each month in addition to your routine monthly blood tests and this will be taken from you on dialysis. The amount of blood taken is small and will not have any negative impact on your health.

Taking part in the study will not affect your current treatment, nor will it affect your ability to obtain insurance for health purposes or receive a kidney transplant if appropriate.

### **What will happen to my data that we collect?**

Baseline information including age, gender, duration of dialysis and other health information will be collected and your data will then be allocated a unique code that will be anonymous. Medical notes may be looked at by responsible individuals from the Sponsor organisation, the NHS Trust, external researchers from the University of Hertfordshire and from regulatory authorities. During follow up the data will be updated to include any changes in your health such as heart attacks and stroke. At the end of the study your data and any health outcomes will be analysed.

Anonymised study data and files will be stored for the duration of the study and up to 5 years. Your personal data collected by the site, will be stored at the site and archived with other study specific documents for at least 5 years after completion or discontinuation of the study.

### **If I participate will my personal medical information be kept confidential?**

All information that is collected about you during the course of the project will be kept strictly confidential. All collected samples will be identified by a code number only. All data collected as part of the study will be de-identified.

If you consent to take part in the research, some parts of your medical records and any of the information collected about you may be inspected by the sponsor (East and North Hertfordshire NHS Trust). Your records may also be looked at by the regulatory authorities or ethics committees to check that the study is being carried out correctly. All those involved with the study will have a duty of confidentiality to you as a research participant and nothing that could reveal your identity will be disclosed outside of the research team.



### **What would happen to the results of the research study?**

We hope to be able to publish the results of this research and will be happy to provide you with a copy of the publication if you request it. You will not be identifiable in this publication. We will be happy to inform you of the summarised study results by postal letter if you wish to receive it.

Individual data will not be made available to participants unless the results could potentially impact on the individual's clinical care. Results would then be shared with the participant and their dialysis doctor. This decision would be made by the Principal investigator at your hospital.

### **Will I be paid for taking part in the study?**

Participation in this study is voluntary and you will not be paid for taking part.

### **Will my GP be informed?**

Yes, your GP will be informed with your consent that you are involved in this study.

### **What if new information becomes available?**

Sometimes during the course of a research project, new information becomes available about the treatment that is being studied. If this happens, the research team will tell you about it and discuss with you whether you want to continue in the study.

### **Who has reviewed the study?**

The study has been reviewed by the East of England – Cambridge South Research Ethics Committee.

### **Who is organising and funding the research?**

This is a multicentre study within the UK funded by The British Renal Society and sponsored by East and North Hertfordshire NHS Trust.

### **What if something goes wrong?**

If you have a concern about any aspect of this study, you should ask to speak with the study doctor/nurse who will do their best to answer your questions.

If you are harmed due to someone's negligence, then you may have grounds for a legal action but you may have to pay your own legal costs. If you wish to complain, or have any concerns about any aspect of the way you have been approached or treated during the course of this study, the normal National Health Service complaints mechanism will be available to you. Formal complaints should be addressed to:

Mr Nick Carver, Chief Executive, Lister Hospital, Corey's Mill Lane, Stevenage, SG1 4AB (Tel: 01438 314333).

Should you require independent advice about making a complaint or seeking compensation, you may wish to contact the Independent Complaints Advocacy Service (ICAS) for Bedfordshire & Hertfordshire at Pohwer ICAS, Hertlands House, Primett Road, Stevenage, Herts, SG1 3EE. Tel: (0845 456 1082).

1  
2  
3 Independent information and advice is available from the Patient advice and liaison service  
4 (PALS).  
5

6 Please contact: 01438 284678 or call 01438 314333 and ask to speak to the PALS.  
7

8 Alternatively please email [pals.enh-tr@nhs.net](mailto:pals.enh-tr@nhs.net)  
9

### 10 **Contact for Further Information**

11  
12 If you have any problems, concerns, complaints or other questions about this study, you  
13 should contact:  
14  
15

16 **Principal Investigator:** Dr Raja Mohammed Kaja Kamal on 01438 284346

17 **Chief Investigator:** Dr Enric Vilar on 01438 286366

18 **Research Nurses:** Ewa Kislowska, Jocelyn Berdeprado on 01438 284346  
19  
20

### 21 **Emergency 24 hour contact number:**

22  
23 If you need to contact someone outside of normal office hours please call the hospital  
24 switchboard on **01438 314 333 and ask to speak to the doctor on-call.**  
25  
26  
27  
28  
29  
30

31 **Thank you very much for taking the time to read this information sheet**  
32  
33  
34  
35  
36  
37  
38  
39  
40  
41  
42  
43  
44  
45  
46  
47  
48  
49  
50  
51  
52  
53  
54  
55  
56  
57  
58  
59  
60

Lister Hospital, Corey's Mill Lane, Stevenage  
Hertfordshire SG1 4AB  
Tel: 01438 314333

1  
2  
3  
4  
5  
6  
7  
8  
9  
10  
11  
12  
13  
14  
15  
16  
17  
18  
19  
20  
21  
22  
23  
24  
25  
26  
27  
28  
29  
30  
31  
32  
33  
34  
35  
36  
37  
38  
39  
40  
41  
42  
43  
44  
45  
46  
47  
48  
49  
50  
51  
52  
53  
54  
55  
56  
57  
58  
59  
60

**PARTICIPANT NAME** .....

**PARTICIPANT IDENTIFICATION NUMBER** .....

### INFORMED CONSENT FORM

**Does incremental initiation of haemodialysis preserve native kidney function? A multicentre feasibility randomised control trial.**

**INVESTIGATOR:** \_\_\_\_\_

Please initial

- 1. I confirm that I have read and understood the Participant Information Sheet version \_\_\_\_\_ date \_\_\_\_\_ for the above study and have had the opportunity to ask questions which have been answered to my satisfaction.
- 2. I understand that my participation is voluntary and that I am free to withdraw at any time, without giving any reason, without my medical care or legal rights being affected.
- 3. I understand that sections of my medical notes may be looked at by responsible individuals from the Sponsor organisation, the NHS Trust, external researchers from the University of Hertfordshire and from regulatory authorities for regulatory purposes and audit. I give permission for these individuals to have access to my records.
- 4. I understand if sections of my medical notes are unclear, the research team may contact my GP for clarification. I give permission for the research team to contact my GP for this purpose.
- 5. I give permission for additional blood and urine samples to be collected and used for research purposes. I understand these samples will be stored anonymously for analysis and a portion of the sample will be sent to an external institution for analysis. The stored samples may be used in future research.
- 6. I agree to take part in the above study.

Name of patient .....

Date .....

Signature .....

Name of Person Taking Consent .....

Date .....

Signature .....

**Three copies required: one for the patient, one for the researcher and one for hospital case notes**

# Reporting checklist for protocol of a clinical trial.

Based on the SPIRIT guidelines.

## Instructions to authors

Complete this checklist by entering the page numbers from your manuscript where readers will find each of the items listed below.

Your article may not currently address all the items on the checklist. Please modify your text to include the missing information. If you are certain that an item does not apply, please write "n/a" and provide a short explanation.

Upload your completed checklist as an extra file when you submit to a journal.

In your methods section, say that you used the SPIRIT reporting guidelines, and cite them as:

Chan A-W, Tetzlaff JM, Altman DG, Laupacis A, Gøtzsche PC, Krleža-Jerić K, Hróbjartsson A, Mann H, Dickersin K, Berlin J, Doré C, Parulekar W, Summerskill W, Groves T, Schulz K, Sox H, Rockhold FW, Rennie D, Moher D. SPIRIT 2013 Statement: Defining standard protocol items for clinical trials. *Ann Intern Med.* 2013;158(3):200-207

|                                             |                     | Reporting Item                                                                                               | Page Number |
|---------------------------------------------|---------------------|--------------------------------------------------------------------------------------------------------------|-------------|
| <b>Administrative information</b>           |                     |                                                                                                              |             |
| Title                                       | <a href="#">#1</a>  | Descriptive title identifying the study design, population, interventions, and, if applicable, trial acronym | 1           |
| Trial registration                          | <a href="#">#2a</a> | Trial identifier and registry name. If not yet registered, name of intended registry                         | 2           |
| Trial registration: data set                | <a href="#">#2b</a> | All items from the World Health Organization Trial Registration Data Set                                     | N/A         |
| Protocol version                            | <a href="#">#3</a>  | Date and version identifier                                                                                  | N/A         |
| Funding                                     | <a href="#">#4</a>  | Sources and types of financial, material, and other support                                                  | 5           |
| Roles and responsibilities: contributorship | <a href="#">#5a</a> | Names, affiliations, and roles of protocol contributors                                                      | 13          |

|    |                           |                     |                                                                      |     |
|----|---------------------------|---------------------|----------------------------------------------------------------------|-----|
| 1  | Roles and                 | <a href="#">#5b</a> | Name and contact information for the trial sponsor                   | 5   |
| 2  | responsibilities:         |                     |                                                                      |     |
| 3  | sponsor contact           |                     |                                                                      |     |
| 4  | information               |                     |                                                                      |     |
| 5  |                           |                     |                                                                      |     |
| 6  |                           |                     |                                                                      |     |
| 7  |                           |                     |                                                                      |     |
| 8  | Roles and                 | <a href="#">#5c</a> | Role of study sponsor and funders, if any, in study design;          | 13  |
| 9  | responsibilities:         |                     | collection, management, analysis, and interpretation of data;        |     |
| 10 | sponsor and funder        |                     | writing of the report; and the decision to submit the report for     |     |
| 11 |                           |                     | publication, including whether they will have ultimate authority     |     |
| 12 |                           |                     | over any of these activities                                         |     |
| 13 |                           |                     |                                                                      |     |
| 14 |                           |                     |                                                                      |     |
| 15 |                           |                     |                                                                      |     |
| 16 | Roles and                 | <a href="#">#5d</a> | Composition, roles, and responsibilities of the coordinating centre, | 13  |
| 17 | responsibilities:         |                     | steering committee, endpoint adjudication committee, data            |     |
| 18 | committees                |                     | management team, and other individuals or groups overseeing the      |     |
| 19 |                           |                     | trial, if applicable (see Item 21a for data monitoring committee)    |     |
| 20 |                           |                     |                                                                      |     |
| 21 |                           |                     |                                                                      |     |
| 22 |                           |                     |                                                                      |     |
| 23 | <b>Introduction</b>       |                     |                                                                      |     |
| 24 |                           |                     |                                                                      |     |
| 25 | Background and            | <a href="#">#6a</a> | Description of research question and justification for undertaking   | 4,5 |
| 26 | rationale                 |                     | the trial, including summary of relevant studies (published and      |     |
| 27 |                           |                     | unpublished) examining benefits and harms for each intervention      |     |
| 28 |                           |                     |                                                                      |     |
| 29 |                           |                     |                                                                      |     |
| 30 | Background and            | <a href="#">#6b</a> | Explanation for choice of comparators                                | 13  |
| 31 | rationale: choice of      |                     |                                                                      |     |
| 32 | comparators               |                     |                                                                      |     |
| 33 |                           |                     |                                                                      |     |
| 34 |                           |                     |                                                                      |     |
| 35 |                           |                     |                                                                      |     |
| 36 | Objectives                | <a href="#">#7</a>  | Specific objectives or hypotheses                                    | 6   |
| 37 |                           |                     |                                                                      |     |
| 38 | Trial design              | <a href="#">#8</a>  | Description of trial design including type of trial (eg, parallel    | 5   |
| 39 |                           |                     | group, crossover, factorial, single group), allocation ratio, and    |     |
| 40 |                           |                     | framework (eg, superiority, equivalence, non-inferiority,            |     |
| 41 |                           |                     | exploratory)                                                         |     |
| 42 |                           |                     |                                                                      |     |
| 43 |                           |                     |                                                                      |     |
| 44 |                           |                     |                                                                      |     |
| 45 | <b>Methods:</b>           |                     |                                                                      |     |
| 46 | <b>Participants,</b>      |                     |                                                                      |     |
| 47 | <b>interventions, and</b> |                     |                                                                      |     |
| 48 | <b>outcomes</b>           |                     |                                                                      |     |
| 49 |                           |                     |                                                                      |     |
| 50 |                           |                     |                                                                      |     |
| 51 | Study setting             | <a href="#">#9</a>  | Description of study settings (eg, community clinic, academic        | 5   |
| 52 |                           |                     | hospital) and list of countries where data will be collected.        |     |
| 53 |                           |                     | Reference to where list of study sites can be obtained               |     |
| 54 |                           |                     |                                                                      |     |
| 55 |                           |                     |                                                                      |     |
| 56 |                           |                     |                                                                      |     |
| 57 | Eligibility criteria      | <a href="#">#10</a> | Inclusion and exclusion criteria for participants. If applicable,    | 7   |
| 58 |                           |                     | eligibility criteria for study centres and individuals who will      |     |
| 59 |                           |                     |                                                                      |     |
| 60 |                           |                     |                                                                      |     |

|    |                              |                                                                                          |          |
|----|------------------------------|------------------------------------------------------------------------------------------|----------|
|    |                              | perform the interventions (eg, surgeons, psychotherapists)                               |          |
| 1  |                              |                                                                                          |          |
| 2  | Interventions:               | <a href="#">#11a</a> Interventions for each group with sufficient detail to allow        | 9        |
| 3  | description                  | replication, including how and when they will be administered                            |          |
| 4  |                              |                                                                                          |          |
| 5  | Interventions:               | <a href="#">#11b</a> Criteria for discontinuing or modifying allocated interventions for | 10       |
| 6  | modifications                | a given trial participant (eg, drug dose change in response to                           |          |
| 7  |                              | harms, participant request, or improving / worsening disease)                            |          |
| 8  |                              |                                                                                          |          |
| 9  | Interventions:               | <a href="#">#11c</a> Strategies to improve adherence to intervention protocols, and any  | 10       |
| 10 | adherence                    | procedures for monitoring adherence (eg, drug tablet return;                             |          |
| 11 |                              | laboratory tests)                                                                        |          |
| 12 | Interventions:               | <a href="#">#11d</a> Relevant concomitant care and interventions that are permitted or   | 9        |
| 13 | concomitant care             | prohibited during the trial                                                              |          |
| 14 |                              |                                                                                          |          |
| 15 | Outcomes                     | <a href="#">#12</a> Primary, secondary, and other outcomes, including the specific       | 6, Table |
| 16 |                              | measurement variable (eg, systolic blood pressure), analysis metric                      | 1        |
| 17 |                              | (eg, change from baseline, final value, time to event), method of                        |          |
| 18 |                              | aggregation (eg, median, proportion), and time point for each                            |          |
| 19 |                              | outcome. Explanation of the clinical relevance of chosen efficacy                        |          |
| 20 |                              | and harm outcomes is strongly recommended                                                |          |
| 21 | Participant timeline         | <a href="#">#13</a> Time schedule of enrolment, interventions (including any run-ins     | Table 2, |
| 22 |                              | and washouts), assessments, and visits for participants. A                               | Figure 1 |
| 23 |                              | schematic diagram is highly recommended (see Figure)                                     |          |
| 24 |                              |                                                                                          |          |
| 25 | Sample size                  | <a href="#">#14</a> Estimated number of participants needed to achieve study             | 10       |
| 26 |                              | objectives and how it was determined, including clinical and                             |          |
| 27 |                              | statistical assumptions supporting any sample size calculations                          |          |
| 28 |                              |                                                                                          |          |
| 29 | Recruitment                  | <a href="#">#15</a> Strategies for achieving adequate participant enrolment to reach     | 6, 8     |
| 30 |                              | target sample size                                                                       |          |
| 31 |                              |                                                                                          |          |
| 32 |                              |                                                                                          |          |
| 33 |                              |                                                                                          |          |
| 34 |                              |                                                                                          |          |
| 35 |                              |                                                                                          |          |
| 36 |                              |                                                                                          |          |
| 37 |                              |                                                                                          |          |
| 38 |                              |                                                                                          |          |
| 39 |                              |                                                                                          |          |
| 40 |                              |                                                                                          |          |
| 41 |                              |                                                                                          |          |
| 42 |                              |                                                                                          |          |
| 43 |                              |                                                                                          |          |
| 44 |                              |                                                                                          |          |
| 45 | <b>Methods: Assignment</b>   |                                                                                          |          |
| 46 | <b>of interventions (for</b> |                                                                                          |          |
| 47 | <b>controlled trials)</b>    |                                                                                          |          |
| 48 |                              |                                                                                          |          |
| 49 |                              |                                                                                          |          |
| 50 | Allocation: sequence         | <a href="#">#16a</a> Method of generating the allocation sequence (eg, computer-         | 8        |
| 51 | generation                   | generated random numbers), and list of any factors for                                   |          |
| 52 |                              | stratification. To reduce predictability of a random sequence,                           |          |
| 53 |                              | details of any planned restriction (eg, blocking) should be provided                     |          |
| 54 |                              | in a separate document that is unavailable to those who enrol                            |          |
| 55 |                              | participants or assign interventions                                                     |          |
| 56 |                              |                                                                                          |          |
| 57 |                              |                                                                                          |          |
| 58 |                              |                                                                                          |          |
| 59 |                              |                                                                                          |          |
| 60 |                              |                                                                                          |          |

|    |                        |                      |                                                                                                                                                                                                                                                                                                                                                                                                              |        |
|----|------------------------|----------------------|--------------------------------------------------------------------------------------------------------------------------------------------------------------------------------------------------------------------------------------------------------------------------------------------------------------------------------------------------------------------------------------------------------------|--------|
| 1  | Allocation             | <a href="#">#16b</a> | Mechanism of implementing the allocation sequence (eg, central telephone; sequentially numbered, opaque, sealed envelopes), describing any steps to conceal the sequence until interventions are assigned                                                                                                                                                                                                    | 8      |
| 2  | concealment            |                      |                                                                                                                                                                                                                                                                                                                                                                                                              |        |
| 3  | mechanism              |                      |                                                                                                                                                                                                                                                                                                                                                                                                              |        |
| 4  |                        |                      |                                                                                                                                                                                                                                                                                                                                                                                                              |        |
| 5  |                        |                      |                                                                                                                                                                                                                                                                                                                                                                                                              |        |
| 6  |                        |                      |                                                                                                                                                                                                                                                                                                                                                                                                              |        |
| 7  |                        |                      |                                                                                                                                                                                                                                                                                                                                                                                                              |        |
| 8  | Allocation:            | <a href="#">#16c</a> | Who will generate the allocation sequence, who will enrol participants, and who will assign participants to interventions                                                                                                                                                                                                                                                                                    | 8      |
| 9  | implementation         |                      |                                                                                                                                                                                                                                                                                                                                                                                                              |        |
| 10 |                        |                      |                                                                                                                                                                                                                                                                                                                                                                                                              |        |
| 11 | Blinding (masking)     | <a href="#">#17a</a> | Who will be blinded after assignment to interventions (eg, trial participants, care providers, outcome assessors, data analysts), and how                                                                                                                                                                                                                                                                    | N/A    |
| 12 |                        |                      |                                                                                                                                                                                                                                                                                                                                                                                                              |        |
| 13 |                        |                      |                                                                                                                                                                                                                                                                                                                                                                                                              |        |
| 14 |                        |                      |                                                                                                                                                                                                                                                                                                                                                                                                              |        |
| 15 |                        |                      |                                                                                                                                                                                                                                                                                                                                                                                                              |        |
| 16 |                        |                      |                                                                                                                                                                                                                                                                                                                                                                                                              |        |
| 17 | Blinding (masking):    | <a href="#">#17b</a> | If blinded, circumstances under which unblinding is permissible, and procedure for revealing a participant's allocated intervention during the trial                                                                                                                                                                                                                                                         | N/A    |
| 18 | emergency unblinding   |                      |                                                                                                                                                                                                                                                                                                                                                                                                              |        |
| 19 |                        |                      |                                                                                                                                                                                                                                                                                                                                                                                                              |        |
| 20 |                        |                      |                                                                                                                                                                                                                                                                                                                                                                                                              |        |
| 21 |                        |                      |                                                                                                                                                                                                                                                                                                                                                                                                              |        |
| 22 | <b>Methods: Data</b>   |                      |                                                                                                                                                                                                                                                                                                                                                                                                              |        |
| 23 | <b>collection,</b>     |                      |                                                                                                                                                                                                                                                                                                                                                                                                              |        |
| 24 | <b>management, and</b> |                      |                                                                                                                                                                                                                                                                                                                                                                                                              |        |
| 25 | <b>analysis</b>        |                      |                                                                                                                                                                                                                                                                                                                                                                                                              |        |
| 26 |                        |                      |                                                                                                                                                                                                                                                                                                                                                                                                              |        |
| 27 |                        |                      |                                                                                                                                                                                                                                                                                                                                                                                                              |        |
| 28 |                        |                      |                                                                                                                                                                                                                                                                                                                                                                                                              |        |
| 29 | Data collection plan   | <a href="#">#18a</a> | Plans for assessment and collection of outcome, baseline, and other trial data, including any related processes to promote data quality (eg, duplicate measurements, training of assessors) and a description of study instruments (eg, questionnaires, laboratory tests) along with their reliability and validity, if known. Reference to where data collection forms can be found, if not in the protocol | 10     |
| 30 |                        |                      |                                                                                                                                                                                                                                                                                                                                                                                                              |        |
| 31 |                        |                      |                                                                                                                                                                                                                                                                                                                                                                                                              |        |
| 32 |                        |                      |                                                                                                                                                                                                                                                                                                                                                                                                              |        |
| 33 |                        |                      |                                                                                                                                                                                                                                                                                                                                                                                                              |        |
| 34 |                        |                      |                                                                                                                                                                                                                                                                                                                                                                                                              |        |
| 35 |                        |                      |                                                                                                                                                                                                                                                                                                                                                                                                              |        |
| 36 |                        |                      |                                                                                                                                                                                                                                                                                                                                                                                                              |        |
| 37 |                        |                      |                                                                                                                                                                                                                                                                                                                                                                                                              |        |
| 38 |                        |                      |                                                                                                                                                                                                                                                                                                                                                                                                              |        |
| 39 | Data collection plan:  | <a href="#">#18b</a> | Plans to promote participant retention and complete follow-up, including list of any outcome data to be collected for participants who discontinue or deviate from intervention protocols                                                                                                                                                                                                                    | 10     |
| 40 | retention              |                      |                                                                                                                                                                                                                                                                                                                                                                                                              |        |
| 41 |                        |                      |                                                                                                                                                                                                                                                                                                                                                                                                              |        |
| 42 |                        |                      |                                                                                                                                                                                                                                                                                                                                                                                                              |        |
| 43 |                        |                      |                                                                                                                                                                                                                                                                                                                                                                                                              |        |
| 44 | Data management        | <a href="#">#19</a>  | Plans for data entry, coding, security, and storage, including any related processes to promote data quality (eg, double data entry; range checks for data values). Reference to where details of data management procedures can be found, if not in the protocol                                                                                                                                            | 10     |
| 45 |                        |                      |                                                                                                                                                                                                                                                                                                                                                                                                              |        |
| 46 |                        |                      |                                                                                                                                                                                                                                                                                                                                                                                                              |        |
| 47 |                        |                      |                                                                                                                                                                                                                                                                                                                                                                                                              |        |
| 48 |                        |                      |                                                                                                                                                                                                                                                                                                                                                                                                              |        |
| 49 |                        |                      |                                                                                                                                                                                                                                                                                                                                                                                                              |        |
| 50 |                        |                      |                                                                                                                                                                                                                                                                                                                                                                                                              |        |
| 51 | Statistics: outcomes   | <a href="#">#20a</a> | Statistical methods for analysing primary and secondary outcomes. Reference to where other details of the statistical analysis plan can be found, if not in the protocol                                                                                                                                                                                                                                     | 11, 12 |
| 52 |                        |                      |                                                                                                                                                                                                                                                                                                                                                                                                              |        |
| 53 |                        |                      |                                                                                                                                                                                                                                                                                                                                                                                                              |        |
| 54 |                        |                      |                                                                                                                                                                                                                                                                                                                                                                                                              |        |
| 55 |                        |                      |                                                                                                                                                                                                                                                                                                                                                                                                              |        |
| 56 | Statistics: additional | <a href="#">#20b</a> | Methods for any additional analyses (eg, subgroup and adjusted analyses)                                                                                                                                                                                                                                                                                                                                     | 11, 12 |
| 57 | analyses               |                      |                                                                                                                                                                                                                                                                                                                                                                                                              |        |
| 58 |                        |                      |                                                                                                                                                                                                                                                                                                                                                                                                              |        |
| 59 |                        |                      |                                                                                                                                                                                                                                                                                                                                                                                                              |        |
| 60 |                        |                      |                                                                                                                                                                                                                                                                                                                                                                                                              |        |

|    |                            |                      |                                                                       |        |
|----|----------------------------|----------------------|-----------------------------------------------------------------------|--------|
| 1  | Statistics: analysis       | <a href="#">#20c</a> | Definition of analysis population relating to protocol non-           | 11, 12 |
| 2  | population and missing     |                      | adherence (eg, as randomised analysis), and any statistical           |        |
| 3  | data                       |                      | methods to handle missing data (eg, multiple imputation)              |        |
| 4  |                            |                      |                                                                       |        |
| 5  |                            |                      |                                                                       |        |
| 6  | <b>Methods: Monitoring</b> |                      |                                                                       |        |
| 7  |                            |                      |                                                                       |        |
| 8  | Data monitoring:           | <a href="#">#21a</a> | Composition of data monitoring committee (DMC); summary of            | 5      |
| 9  | formal committee           |                      | its role and reporting structure; statement of whether it is          |        |
| 10 |                            |                      | independent from the sponsor and competing interests; and             |        |
| 11 |                            |                      | reference to where further details about its charter can be found, if |        |
| 12 |                            |                      | not in the protocol. Alternatively, an explanation of why a DMC is    |        |
| 13 |                            |                      | not needed                                                            |        |
| 14 |                            |                      |                                                                       |        |
| 15 | Data monitoring:           | <a href="#">#21b</a> | Description of any interim analyses and stopping guidelines,          | 5      |
| 16 | interim analysis           |                      | including who will have access to these interim results and make      |        |
| 17 |                            |                      | the final decision to terminate the trial                             |        |
| 18 |                            |                      |                                                                       |        |
| 19 |                            |                      |                                                                       |        |
| 20 | Harms                      | <a href="#">#22</a>  | Plans for collecting, assessing, reporting, and managing solicited    | 11     |
| 21 |                            |                      | and spontaneously reported adverse events and other unintended        |        |
| 22 |                            |                      | effects of trial interventions or trial conduct                       |        |
| 23 |                            |                      |                                                                       |        |
| 24 |                            |                      |                                                                       |        |
| 25 | Auditing                   | <a href="#">#23</a>  | Frequency and procedures for auditing trial conduct, if any, and      | N/A    |
| 26 |                            |                      | whether the process will be independent from investigators and the    |        |
| 27 |                            |                      | sponsor                                                               |        |
| 28 |                            |                      |                                                                       |        |
| 29 |                            |                      |                                                                       |        |
| 30 |                            |                      |                                                                       |        |
| 31 |                            |                      |                                                                       |        |
| 32 |                            |                      |                                                                       |        |
| 33 |                            |                      |                                                                       |        |
| 34 | <b>Ethics and</b>          |                      |                                                                       |        |
| 35 | <b>dissemination</b>       |                      |                                                                       |        |
| 36 |                            |                      |                                                                       |        |
| 37 |                            |                      |                                                                       |        |
| 38 | Research ethics            | <a href="#">#24</a>  | Plans for seeking research ethics committee / institutional review    | 2, 5   |
| 39 | approval                   |                      | board (REC / IRB) approval                                            |        |
| 40 |                            |                      |                                                                       |        |
| 41 |                            |                      |                                                                       |        |
| 42 | Protocol amendments        | <a href="#">#25</a>  | Plans for communicating important protocol modifications (eg,         | N/A    |
| 43 |                            |                      | changes to eligibility criteria, outcomes, analyses) to relevant      |        |
| 44 |                            |                      | parties (eg, investigators, REC / IRBs, trial participants, trial     |        |
| 45 |                            |                      | registries, journals, regulators)                                     |        |
| 46 |                            |                      |                                                                       |        |
| 47 |                            |                      |                                                                       |        |
| 48 |                            |                      |                                                                       |        |
| 49 | Consent or assent          | <a href="#">#26a</a> | Who will obtain informed consent or assent from potential trial       | 7      |
| 50 |                            |                      | participants or authorised surrogates, and how (see Item 32)          |        |
| 51 |                            |                      |                                                                       |        |
| 52 |                            |                      |                                                                       |        |
| 53 | Consent or assent:         | <a href="#">#26b</a> | Additional consent provisions for collection and use of participant   | N/A    |
| 54 | ancillary studies          |                      | data and biological specimens in ancillary studies, if applicable     |        |
| 55 |                            |                      |                                                                       |        |
| 56 |                            |                      |                                                                       |        |
| 57 | Confidentiality            | <a href="#">#27</a>  | How personal information about potential and enrolled participants    | 8      |
| 58 |                            |                      | will be collected, shared, and maintained in order to protect         |        |
| 59 |                            |                      |                                                                       |        |
| 60 |                            |                      |                                                                       |        |



confidentiality before, during, and after the trial

|    |                          |                      |                                                                        |
|----|--------------------------|----------------------|------------------------------------------------------------------------|
| 1  |                          |                      |                                                                        |
| 2  |                          |                      |                                                                        |
| 3  | Declaration of interests | <a href="#">#28</a>  | Financial and other competing interests for principal investigators 13 |
| 4  |                          |                      | for the overall trial and each study site                              |
| 5  |                          |                      |                                                                        |
| 6  | Data access              | <a href="#">#29</a>  | Statement of who will have access to the final trial dataset, and NA   |
| 7  |                          |                      | disclosure of contractual agreements that limit such access for        |
| 8  |                          |                      | investigators                                                          |
| 9  |                          |                      |                                                                        |
| 10 |                          |                      |                                                                        |
| 11 | Ancillary and post trial | <a href="#">#30</a>  | Provisions, if any, for ancillary and post-trial care, and for NA      |
| 12 | care                     |                      | compensation to those who suffer harm from trial participation         |
| 13 |                          |                      |                                                                        |
| 14 |                          |                      |                                                                        |
| 15 | Dissemination policy:    | <a href="#">#31a</a> | Plans for investigators and sponsor to communicate trial results to 2  |
| 16 | trial results            |                      | participants, healthcare professionals, the public, and other          |
| 17 |                          |                      | relevant groups (eg, via publication, reporting in results databases,  |
| 18 |                          |                      | or other data sharing arrangements), including any publication         |
| 19 |                          |                      | restrictions                                                           |
| 20 |                          |                      |                                                                        |
| 21 |                          |                      |                                                                        |
| 22 |                          |                      |                                                                        |
| 23 | Dissemination policy:    | <a href="#">#31b</a> | Authorship eligibility guidelines and any intended use of NA           |
| 24 | authorship               |                      | professional writers                                                   |
| 25 |                          |                      |                                                                        |
| 26 |                          |                      |                                                                        |
| 27 | Dissemination policy:    | <a href="#">#31c</a> | Plans, if any, for granting public access to the full protocol, NA     |
| 28 | reproducible research    |                      | participant-level dataset, and statistical code                        |
| 29 |                          |                      |                                                                        |
| 30 |                          |                      |                                                                        |

### 31 Appendices

|    |                      |                     |                                                                      |
|----|----------------------|---------------------|----------------------------------------------------------------------|
| 32 |                      |                     |                                                                      |
| 33 |                      |                     |                                                                      |
| 34 | Informed consent     | <a href="#">#32</a> | Model consent form and other related documentation given to 6, 7     |
| 35 | materials            |                     | participants and authorised surrogates                               |
| 36 |                      |                     |                                                                      |
| 37 |                      |                     |                                                                      |
| 38 | Biological specimens | <a href="#">#33</a> | Plans for collection, laboratory evaluation, and storage of Table 2  |
| 39 |                      |                     | biological specimens for genetic or molecular analysis in the        |
| 40 |                      |                     | current trial and for future use in ancillary studies, if applicable |
| 41 |                      |                     |                                                                      |
| 42 |                      |                     |                                                                      |

### 43 Notes:

- 44
- 45 • 13: Table 2, Figure 1 The SPIRIT checklist is distributed under the terms of the Creative Commons
- 46 Attribution License CC-BY-ND 3.0. This checklist was completed on 21. November 2019 using
- 47 <https://www.goodreports.org/>, a tool made by the [EQUATOR Network](#) in collaboration with [Penelope.ai](#)
- 48
- 49
- 50
- 51
- 52
- 53
- 54
- 55
- 56
- 57
- 58
- 59

# BMJ Open

## Impact of Incremental versus Conventional Initiation of Haemodialysis on Residual Kidney Function: Study protocol for a multicentre feasibility randomised controlled trial.

|                                 |                                                                                                                                                                                                                                                                                                                                                                                                                                                                                                                                                                                                                                                                              |
|---------------------------------|------------------------------------------------------------------------------------------------------------------------------------------------------------------------------------------------------------------------------------------------------------------------------------------------------------------------------------------------------------------------------------------------------------------------------------------------------------------------------------------------------------------------------------------------------------------------------------------------------------------------------------------------------------------------------|
| Journal:                        | <i>BMJ Open</i>                                                                                                                                                                                                                                                                                                                                                                                                                                                                                                                                                                                                                                                              |
| Manuscript ID                   | bmjopen-2019-035919.R2                                                                                                                                                                                                                                                                                                                                                                                                                                                                                                                                                                                                                                                       |
| Article Type:                   | Protocol                                                                                                                                                                                                                                                                                                                                                                                                                                                                                                                                                                                                                                                                     |
| Date Submitted by the Author:   | 26-Apr-2020                                                                                                                                                                                                                                                                                                                                                                                                                                                                                                                                                                                                                                                                  |
| Complete List of Authors:       | KAJA KAMAL, RAJA MOHAMMED; East and North Hertfordshire NHS Trust, Renal Unit; University of Hertfordshire<br>Farrington, Ken; East and North Hertfordshire NHS Trust, Renal Unit; University of Hertfordshire<br>Wellsted, David; University of Hertfordshire<br>Sridharan , Sivakumar; East and North Hertfordshire NHS Trust, Renal Unit; University of Hertfordshire<br>Alchi, Bassam; Royal Berkshire NHS Foundation Trust, Renal Unit<br>Burton, James; University Hospitals of Leicester NHS Trust, Renal Unit<br>Davenport, Andrew; Royal Free Hospital, Renal Unit<br>Vilar, Enric; East and North Hertfordshire NHS Trust, Renal Unit; University of Hertfordshire |
| <b>Primary Subject Heading</b>: | Renal medicine                                                                                                                                                                                                                                                                                                                                                                                                                                                                                                                                                                                                                                                               |
| Secondary Subject Heading:      | Renal medicine                                                                                                                                                                                                                                                                                                                                                                                                                                                                                                                                                                                                                                                               |
| Keywords:                       | Adult nephrology < NEPHROLOGY, Dialysis < NEPHROLOGY, End stage renal failure < NEPHROLOGY                                                                                                                                                                                                                                                                                                                                                                                                                                                                                                                                                                                   |
|                                 |                                                                                                                                                                                                                                                                                                                                                                                                                                                                                                                                                                                                                                                                              |

SCHOLARONE™  
Manuscripts

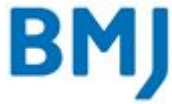

I, the Submitting Author has the right to grant and does grant on behalf of all authors of the Work (as defined in the below author licence), an exclusive licence and/or a non-exclusive licence for contributions from authors who are: i) UK Crown employees; ii) where BMJ has agreed a CC-BY licence shall apply, and/or iii) in accordance with the terms applicable for US Federal Government officers or employees acting as part of their official duties; on a worldwide, perpetual, irrevocable, royalty-free basis to BMJ Publishing Group Ltd ("BMJ") its licensees and where the relevant Journal is co-owned by BMJ to the co-owners of the Journal, to publish the Work in this journal and any other BMJ products and to exploit all rights, as set out in our [licence](#).

The Submitting Author accepts and understands that any supply made under these terms is made by BMJ to the Submitting Author unless you are acting as an employee on behalf of your employer or a postgraduate student of an affiliated institution which is paying any applicable article publishing charge ("APC") for Open Access articles. Where the Submitting Author wishes to make the Work available on an Open Access basis (and intends to pay the relevant APC), the terms of reuse of such Open Access shall be governed by a Creative Commons licence – details of these licences and which [Creative Commons](#) licence will apply to this Work are set out in our licence referred to above.

Other than as permitted in any relevant BMJ Author's Self Archiving Policies, I confirm this Work has not been accepted for publication elsewhere, is not being considered for publication elsewhere and does not duplicate material already published. I confirm all authors consent to publication of this Work and authorise the granting of this licence.

**TITLE:**

Impact of Incremental versus Conventional Initiation of Haemodialysis on Residual Kidney Function: Study protocol for a multicentre feasibility randomised controlled trial.

**Author:**

Kaja Kamal RM<sup>1,2</sup>, Farrington K<sup>1,2</sup>, Wellsted D<sup>2</sup>, Sridharan S<sup>1,2</sup>, Alchi B<sup>3</sup>, Burton J<sup>4</sup>, Davenport A<sup>5</sup>, Vilar E<sup>1,2</sup>

**Institution:** <sup>1</sup>Renal Unit, Lister Hospital, East and North Hertfordshire NHS Trust, UK.

<sup>2</sup>University of Hertfordshire, Hatfield, UK.

<sup>3</sup>Royal Berkshire Hospital NHS Trust, UK.

<sup>4</sup>University Hospitals of Leicester NHS Trust, UK.

<sup>5</sup>Royal Free London NHS Foundation Trust, UK.

**Corresponding author**

Dr Enric Vilar

Email [enric.vilar@nhs.net](mailto:enric.vilar@nhs.net)

Renal Unit, Lister Hospital, East and North Herts NHS Trust, Hertfordshire, SG1 4AB, UK

Word count 3151

## ABSTRACT

### Introduction

Preserving Residual Kidney Function(RKF) may be beneficial to patients on haemodialysis (HD) and it has been proposed that commencing dialysis incrementally rather than three times a week may preserve RKF. In Incremental HD, target dose includes a contribution from RKF, which is added to HD dose, allowing individualisation of the HD prescription. We will conduct a feasibility randomised controlled trial(RCT) comparing incremental HD and conventional three times weekly treatments in incident HD patients. The study is designed also to provide pilot data to allow determination of effect size to power a definitive study.

### Methods and Analysis

After screening to ensure native renal urea clearance  $>3\text{ml}/\text{min}/1.73\text{m}^2$ , the study will randomise 54 patients within 3 months of HD initiation to conventional in-centre thrice weekly dialysis or incremental in-centre HD commencing two days a week. Subjects will be followed up for 12 months. The study will be carried out across 4 UK renal centres.

The primary outcome is to evaluate the feasibility of conducting a definitive RCT and to estimate the difference in rate of decline of RKF between the two groups at 6 and 12-month time points. Secondary outcomes will include the impact of dialysis intensity on vascular access events, major adverse cardiac events(MACE) and survival. Impact of dialysis intensity on patient reported outcomes measures, cognition and frailty will be assessed using EQ-5D-5L, PHQ-9, Illness intrusiveness rating score(IIRS), Montreal Cognitive assessment(MoCA), and Clinical Frailty Score(CFS). Safety outcomes include hospitalisation, fluid overload episodes, hyperkalaemia events and vascular access events.

This study will inform the design of a definitive study, adequately powered to determine whether RKF is better preserved after incremental HD initiation compared to conventional initiation.

### Ethics and dissemination

Ethics approval has been granted by Cambridge South Research Ethics Committee, United Kingdom(REC17/EE/0311). Results will be disseminated via peer-reviewed publication.

**Trial registration number:**NCT03418181

Key words: 3 -10 keywords

Residual Kidney Function -End stage renal disease – HD - RCT – Randomised Controlled Trial

**Strengths and limitations of this study**

- There are no randomised studies comparing incremental HD and conventional three times weekly treatments in incident HD patients. This study will address this gap.
- It will provide data on feasibility of recruitment to a definitive study together with an estimate of the effect size of group differences in rate of loss residual kidney function allowing sample size calculation.
- Impact and intrusiveness of dialysis intensity will also be compared between groups.
- The sample size will not permit definitive determination of differences in the rate of decline of RKF between groups.

## Background

Most end stage renal failure (ESRF) patients have a degree of native kidney function (Residual Kidney Function, RKF) remaining when they initiate HD. There has been recent interest in incremental HD, a method of individualising HD according to the level of RKF to permit dialysis to be commenced at a lower intensity than conventional approaches allow. Most patients commence dialysis using conventional three times weekly dialysis with RKF usually not accounted for in prescribing dialysis dose. In Incremental HD, RKF is combined with dialysis clearance to provide an overall measure of solute removal allowing the dose provided by dialysis to be individualised. Various algorithms are available to assist with this such as Standard Kt/V (Std Kt/V) which includes contributions from both Std Kt/V<sub>RKF</sub> and Std Kt/V<sub>dialysis</sub> [1-3]. In this approach, reduction of dialysis dose may be considered provided that the combined urea clearance targets are met and other markers of dialysis adequacy such as blood pressure, inter-dialytic weight gains, anaemia, potassium, phosphate control, nutrition and general well-being are not compromised. The technique requires that the proportion of target dose provided by dialysis is increased as the RKF declines or if there are any other indicators for inadequate dialysis. The dialysis team and patients need to be aware of the importance of regular measurement of RKF 1 to 3 monthly [4]. This incremental approach may not be suitable for patients who are unable or unwilling to collect urine samples.

Traditionally RKF has been incorporated into peritoneal dialysis dosing but it has not been included in calculating HD dose due to limited practical experiences and outcome data from clinical studies. There are no RCTs that compare clinical outcomes of incremental HD and those of conventional thrice-weekly HD. A number of observational studies have compared clinical outcomes of twice-weekly HD and conventional thrice-weekly HD regimens [5-19]. These studies suggest that the mortality risks and survival outcomes are not inferior in those on the twice weekly dialysis regimen compared and those treated conventionally, provided there is adequate RKF. Importantly, several non-randomised studies have suggested that RKF is better preserved in those dialysed twice weekly commencing soon after dialysis initiation [6,10, 11, 17, 18]. Preservation of RKF may provide clinical benefits to HD patients including

1  
2  
3 better fluid control, significant solute and fluid removal. It is also associated with improved  
4 quality of life and survival.  
5  
6  
7

8  
9 These findings indicate the need for a prospective RCT comparing RKF preservation following  
10 incremental and conventional initiation of dialysis. We are undertaking a study to determine  
11 the feasibility of conducting such a study. Our study will also provide pilot data to estimate  
12 differences in the rate of decline of RKF in the first year after commencing dialysis using either  
13 conventional or incremental approaches. The primary outcome of our study is to evaluate the  
14 feasibility of conducting a RCT in patients who have recently started HD. Patients will be  
15 randomised either to an incremental arm initiating with twice weekly dialysis or to a  
16 conventional three times weekly dialysis. Our study will explore key methodological, design,  
17 and safety issues, and also estimate an effect size. These findings will facilitate the design of  
18 a subsequent definitive study.  
19  
20  
21  
22  
23  
24  
25  
26  
27  
28

## 29 **Methods/Design**

### 30 **Funding and governance**

31  
32 The study is funded by the British Kidney Patient Association & British Renal Society Joint  
33 Grants Programme, grant number 16-020. The trial is sponsored by East and North  
34 Hertfordshire NHS Trust. The University of Hertfordshire Clinical Trial Support Network  
35 (CTSN) will provide independent support for randomisation and monitoring of the study. The  
36 conduct of the trial will be overseen by a Steering group which will meet regularly and will  
37 include an independent Chair and co-applicants. The CTSN will monitor compliance with the  
38 study protocol at 3 months following study initiation and then as required by sponsor scrutiny  
39 of data returns.  
40  
41  
42  
43  
44  
45  
46  
47  
48  
49

### 50 **Ethics and dissemination**

51  
52 The study received ethical approval from East of England – Cambridge South (REC reference  
53 17/EE/0311; IRAS project ID 219032). Study endpoints, whether negative or positive, will be  
54 published with the intention of reaching a wide audience in nephrology both in peer-  
55 reviewed publication and also submitted for presentation at international and UK meetings  
56  
57  
58  
59  
60



1  
2  
3 including the British Renal Society Conference. Following publication of final data an  
4 anonymised data set will be made available on request.  
5  
6  
7

## 8 9 Patient and public involvement

10 A summary of the initial protocol was shared with ten patients who were asked to comment on the  
11 study design, the potential willingness of patients to participate in the study, and the burden of study  
12 procedures and interventions. Their comments were taken account of in preparing the final version  
13 of the protocol. Patients will be involved in interpreting study finding and in design of definitive study.  
14 We will report a summary of results to patients in a personal communication by mail. We will also  
15 summarise results to local patient association newsletters.  
16  
17  
18  
19  
20  
21  
22

## 23 Setting

24 The study will take place in four NHS Trust renal units – East and North Hertfordshire, Royal  
25 Free Hospitals, Royal Berkshire Hospitals and University Hospitals of Leicester. The total  
26 number of participants from all centres will be 54. Recruitment commenced in January 2018  
27 and completion of follow up will be in May 2020.  
28  
29  
30  
31

## 32 Study Objectives and End Points:

33 The study's primary objective is to determine the feasibility of conducting a definitive RCT of  
34 incremental HD initiation, compared with conventional thrice weekly in-centre HD initiation.  
35 There are a number of aspects to this primary objective which are summarised in Table 1. We  
36 will determine, at each study site, the proportion of incident HD patients it is practical to  
37 approach, who pre-screen as suitable for formal study screening (eligibility for screening). We  
38 will determine the proportion of those patients who consent undergo formal screening, pass  
39 the screening test and are randomised (recruitability). We will also determine the study  
40 retention rate (retainability) as well as fidelity to the protocol (protocol adherence) of patients  
41 in the study. Numerators and denominators for these parameters are shown in Figure 1. The  
42 study will establish evidence for the safety of the incremental approach. It will also generate  
43 data allowing estimation of the effect size of the difference in rate of decline of RKF in the 6  
44 months following randomisation between incremental and conventional HD arms.  
45  
46  
47  
48  
49  
50  
51  
52  
53  
54  
55  
56  
57

58 Secondary objectives of the study are to determine whether there is a signal of benefit for  
59 incremental HD initiation for improving Quality of Life, mood, cognitive function, illness  
60

1  
2  
3 intrusiveness, functional status, frailty, risk of vascular access failure or interventions, major  
4 adverse cardiac events and survival. Specific tools used and methods to measure secondary  
5 outcomes related to these secondary objectives are detailed in Table 1. Illness intrusiveness  
6 will be measured with the Illness Intrusiveness Rating Scale, a validated tool to measure  
7 impact of the dialysis treatment and disease on physiologically meaningful activity and its  
8 psychosocial impact[20]. Quality of Life will be measured using EQ-5D-5L, a validated tool  
9 which will capture different dimensions of quality of life including anxiety/depression and  
10 pain/discomfort and can be used in health-economic evaluation[21]. Cognitive function will  
11 be measured using the Montreal Cognitive Assessment (MoCA) which is a tool for assessment  
12 of cognitive function that has been validated in dialysis patients against detailed  
13 neurophysiological testing covering different domains of cognitive function and provides  
14 good sensitivity and specificity for identifying cognitive impairment in this population [22, 23].  
15 Clinical frailty will be measured using the Clinical Frailty Score[24, 25].  
16  
17  
18  
19  
20  
21  
22  
23  
24  
25  
26  
27  
28  
29  
30  
31  
32  
33  
34  
35  
36  
37  
38  
39  
40  
41  
42  
43  
44  
45  
46  
47  
48  
49  
50  
51  
52  
53  
54  
55  
56  
57  
58  
59  
60

Table 1 Study objectives

| Primary Objective                                                                                                  | Primary Outcome                                                                                                                                                                                                                                                                                                   |
|--------------------------------------------------------------------------------------------------------------------|-------------------------------------------------------------------------------------------------------------------------------------------------------------------------------------------------------------------------------------------------------------------------------------------------------------------|
| The proportion of eligible subjects agreeing to participate in the study – <b>Recruitability</b>                   | * Proportion incident HD patients it is practical to approach, who pre-screen as suitable for screening (eligibility for screening)<br>*Proportion of screened patients who fulfil all eligibility criteria for participation in the study<br>*Proportion of these patients who agree to participate in the study |
| The proportion of randomised subjects who remain in the study – <b>Retainability</b>                               | Proportion of patients randomised who remain in the study excluding study withdrawals, and reasons for withdrawals                                                                                                                                                                                                |
| The proportion of subjects who adhere to protocol-driven changes in dialysis frequency - <b>Protocol adherence</b> | Proportion of patients who adhere to protocol dialysis frequency                                                                                                                                                                                                                                                  |
| The number of adverse and serious adverse events - <b>Safety of the study</b>                                      | Frequency of hospital admission due to hyperkalemia and fluid overload, and lower respiratory tract infection (LRTI)                                                                                                                                                                                              |
| An estimate of the effectiveness of the intervention - <b>Effect size</b>                                          | *Dialysis dose and residual kidney function as measured by Std Kt/V<br>*Rate of change (mean) of RKF in the first 6 and 12 months after randomisation.                                                                                                                                                            |
| Secondary Objectives                                                                                               | Secondary Outcome                                                                                                                                                                                                                                                                                                 |
| Retention of RKF                                                                                                   | Proportion of patients with interdialytic urea clearance $\geq 2$ and $\geq 3$ ml/min/1.73m <sup>2</sup> at 6 months.                                                                                                                                                                                             |
| Quality of life (QOL)                                                                                              | QOL is assessed using EQ-5D-5L questionnaire                                                                                                                                                                                                                                                                      |
| Mood – Depression                                                                                                  | Depression assessed using PHQ-9 questionnaire.                                                                                                                                                                                                                                                                    |
| Cognitive function                                                                                                 | Change in cognitive function as assessed by MOCA tool                                                                                                                                                                                                                                                             |
| Illness intrusiveness                                                                                              | Illness intrusiveness is assessed using Illness intrusiveness rating scale                                                                                                                                                                                                                                        |
| Functional status /Frailty                                                                                         | Functional status assessed by Clinical Frailty Score (CFS)                                                                                                                                                                                                                                                        |
| Vascular access failures or problems                                                                               | Frequency of vascular access failures and interventions                                                                                                                                                                                                                                                           |
| Major Adverse Cardiac Events (MACE)                                                                                | MACE is assessed by recording of the frequency of the events.                                                                                                                                                                                                                                                     |
| Survival                                                                                                           | Survival is measured by all-cause mortality                                                                                                                                                                                                                                                                       |

## Participants

All adult patients who have commenced HD in the previous 3 months will be considered for the study. Those who potentially meet the eligibility criteria after pre-screening by review of medical records including the requirement for a standard of care inter-dialytic urea clearance  $\geq 3\text{ml/min/1.73m}^2$  BSA will be eligible for study screening. Those consenting for the study will undergo formal screening to include confirmation of their meeting the eligibility criteria including having an inter-dialytic urea clearance  $\geq 3\text{ml/min/1.73m}^2$  BSA on retesting.

## Consent

Consent will be required prior to screening procedures and will include agreement to screening which includes confirmation of urea clearance  $\geq 3\text{ml/min/1.73m}^2$  BSA and an explicit consent to a protocol-driven dialysis regimen and to randomisation to incremental HD or standard thrice weekly HD arms.

## Inclusion Criteria:

- Age  $\geq 18$  years.
- Advanced kidney failure - established as a new starter on HD within the previous 3 months.
- RKF likely to permit twice weekly dialysis as defined by inter-dialytic urea clearance  $\geq 3\text{ml/min/1.73m}^2$  BSA measured routinely as part of standard care or as pre-screening.
- Sufficient understanding of the study procedures and requirements including capacity for explicit agreement to be randomised to standard or incremental HD regimens.

## Exclusion Criteria:

- Planned organ transplantation within 3 months from study screening.
- Anticipated requirement for high-volume ultrafiltration on dialysis (e.g. subjects with daily enteral or parenteral nutrition)
- Blood-borne virus positivity.
- Subjects unable to comply with requirement for monthly inter-dialytic urine collection.

- Pregnancy.
- Prognosis <12 months as judged by the Principal Investigator.

## Screening phase

At screening inclusion and exclusion criteria will be confirmed. Confirmation of inter-dialytic urea clearance  $\geq 3\text{ml/min/1.73m}^2$  BSA will be performed. Pregnancy test will be performed in females of child-bearing age to reduce chance of unexpected pregnancy occurring during the study which would require study withdrawal. Patients who, at screening, are eligible for study participation according to eligibility criteria, and who are confirmed to have a screening inter-dialytic urea clearance  $\geq 3\text{ml/min/1.73m}^2$  BSA will be eligible for randomisation. Subjects who fail screening will be eligible for re-screening one month later provided their screening urea clearance is  $>2\text{ml/min/1.73m}^2$  BSA and the rescreening time point remains within 3 months of dialysis initiation. At re-screening, a urea clearance  $\geq 3\text{ml/min/1.73m}^2$  BSA will be required for randomisation into the study.

## Randomisation

Web-based randomisation will be carried out by each centre using Qualtrics, supported by the Clinical Trials Support Network, University of Hertfordshire. Subjects will be randomised on a 1:1 basis to each study arm and each subject allocated a unique study ID.

## Study phase

Following randomisation, study subjects will be dialysed according to the protocol of their randomisation arm as per the schematic in Figure 1. Monthly quality assessment of dialysis in both arms will include a measure of dialysis clearance (Std  $\text{Kt/V}_{\text{Dialysis}}$ ). RKF will be measured monthly by urea clearance in both arms and converted to Std  $\text{Kt/V}_{\text{RKF}}$ .

In the standard dialysis arm, dialysis adequacy will be assessed only using the Std  $\text{Kt/V}_{\text{Dialysis}}$ . In the incremental dialysis arm, the adequacy will be assessed using a composite of dialysis clearance (Std  $\text{Kt/V}_{\text{Dialysis}}$ ) and RKF (Std  $\text{Kt/V}_{\text{RKF}}$ ) as detailed below. This composite is termed Std  $\text{Kt/V}_{\text{Dialysis+RKF}}$ . HD modes will remain standard throughout the study. Haemodiafiltration may be used where blood flow  $>250$  ml/min, otherwise high-flux HD will be used.

## Assessment of residual kidney function

There are two main methods of including residual kidney function in HD prescription. The first converts residual urea clearance to an equivalent dialysis sessional clearance[7]. The second converts sessional Kt/V to a weekly equivalent clearance. Both these allow the addition of dialysis and renal clearances. There are two variants of the second method: standard Kt/V[26] and the Casino-Lopez Equivalent renal urea clearance (EKR)[27]. Both these are urea clearance based. The ERBP guidelines recommend use of GFR (mean of urea and creatinine clearance) in the EKR equation rather than urea clearance which was intrinsic to originally derived equation. We have used standard Kt/V which takes a more conservative view of RKF since urea clearance is around 30% lower than GFR. Further details of the methodology for assessment of residual kidney function can be found in Supplementary Material 1.

## Groups

### Control Group: Standard HD arm

Subjects in the standard HD arm will be dialysed to target minimum Std Kt/V<sub>Dialysis</sub> of 2 per week. Subjects will be dialysed after randomisation initially for 3.5-4 hours thrice weekly. Dialysis dose will be adjusted using standard measures including maximising blood flow, dialysis time, membrane surface area and improving vascular access. Reduction in dialysis frequency will not be permitted.

### Interventional Group: Incremental HD arm

Subjects randomised to the incremental HD arm will be dialysed to a target minimum Std Kt/V<sub>Total</sub> (Std Kt/V<sub>dialysis</sub> + Std Kt/V<sub>RKF</sub>) of 2 per week. Following randomisation dialysis will be initiated twice weekly, with a session duration of 3.5-4 hours. If Std Kt/V<sub>Total</sub> exceeds the minimum target, clinicians will be permitted to reduce dialysis duration provided the target level is still achieved. If Std Kt/V<sub>Total</sub> does not meet the target, clinicians will be permitted to increase dialysis dose by optimising dialysis clearance (membrane selection, blood flow, vascular access, increasing dialysis time or frequency). Clinicians will also be permitted to increase the dialysis frequency to thrice-weekly or greater if required. The main trigger for

1  
2  
3 this will be failure to meet minimum adequacy targets but clinicians will have the freedom to  
4 make this transition on other clinical grounds including hyperkalaemia and fluid overload. The  
5 reasons for switching from twice to thrice weekly will be recorded. Hyperkalaemia and fluid  
6 overload are also captured as Serious Adverse Events.  
7  
8  
9

### 10 11 12 Deviations to study protocol

13  
14 If subjects are admitted to hospital, efforts will be made to maintain adherence to the dialysis  
15 protocol. However, during admissions, modifications to the dialysis prescription, which  
16 include increasing dialysis frequency, are permitted in the interests of patient safety. These  
17 will be recorded as protocol deviations.  
18  
19  
20  
21  
22

23  
24 In the event of subjects in the incremental HD arm not providing inter-dialytic urine samples  
25 for calculation of Standard  $Kt/V_{\text{Renal}}$  for two consecutive months, the subject will be advised  
26 to dialyse thrice weekly and will remain in the study with target Standard  $Kt/V_{\text{Dialysis}} >2$  (i.e.  
27 assuming RRF is zero), until an inter-dialytic urine collection is provided. Additional study visits  
28 may be performed if necessary following hospital admission, holiday or non-adherence to  
29 treatment schedule.  
30  
31  
32  
33  
34

### 35 36 37 Procedures to avoid loss from follow up or study withdrawal

38  
39 The patient information sheet (Supplementary Material 2) and consent form (Supplementary  
40 Material 3) will draw attention to the requirement for patients to agree that their dialysis  
41 regimen and frequency will be adjusted according to the study protocol.  
42  
43  
44  
45

46  
47 For patients wishing to withdraw consent, the investigator will explore with the patient the  
48 reasons for wishing to withdraw. In patients who wish to withdraw because they are unable  
49 to tolerate the intensity, frequency or duration of dialysis, the investigator will be permitted  
50 to offer to the patient to remain in the study with reduced dialysis intensity according to  
51 clinical judgement and record this as a protocol deviation (intention-to-treat approach).  
52 Patients who withdraw will be encouraged to remain in the study for the purpose of outcome  
53 data collection including measurement of RKF.  
54  
55  
56  
57  
58  
59  
60

## Data Collection

Data will be collected by the research team members at baseline and then monthly thereafter for 12 months. Table 2 summarises study assessments during the study and study time points.

*Table 2 Schedule of events.*

\*Patients who fail screening will be eligible for re-screening one month later provided their screening urea clearance is  $>2\text{ml/min/1.73m}^2$  BSA and the rescreening time point remains within 3 months of HD initiation.

\*\* Dialysis adequacy can be calculated using either PostHD1 Urea, PreHD2 Urea, PostHD2 Urea or optionally using PreHD1 Urea, PostHD1 Urea, PreHD2 Urea.

|                                                                                                            | Study Period    |                        |             |
|------------------------------------------------------------------------------------------------------------|-----------------|------------------------|-------------|
|                                                                                                            | Pre-screening   | Baseline/Screening     | Visit 1-12  |
| <b>Months</b>                                                                                              | <b>-12 to 0</b> | <b>0</b>               | <b>1-12</b> |
| <b>Study Procedures/Assessments</b>                                                                        |                 |                        |             |
| Consent                                                                                                    |                 | X                      |             |
| Inclusion/Exclusion Criteria                                                                               | X               | X                      |             |
| Demographics, Medical History, Physical examination, Height                                                |                 | X                      |             |
| Randomisation                                                                                              |                 | X                      |             |
| Rescreening*                                                                                               |                 | X                      |             |
| Concomitant medications -Diuretics, Erythropoietin Stimulating Agents, Antihypertensive, Phosphate Binders |                 | X                      | X           |
| Monthly dialysis blood tests                                                                               |                 | X                      | X           |
| Monthly dialysis Adequacy assessments                                                                      |                 | X                      | X           |
| Pre HD1 Urea, Post HD1 Urea, Pre HD2 Urea, Post HD2 Urea**                                                 | X               | X                      | X           |
| Inter-dialytic urine collection for Urea & Creatinine Clearance measurement                                |                 | X                      | X           |
| Frozen samples for $\beta$ -2 Microglobulin & $\beta$ Trace Protein                                        |                 | X                      | X           |
| Bioimpedence measurement                                                                                   |                 | X                      | X           |
| <b>Safety Assessments</b>                                                                                  |                 |                        |             |
| Adverse Events, Serious Adverse Events, MACE, End points                                                   |                 |                        | X           |
| <b>Questionnaires</b>                                                                                      |                 |                        |             |
| EQ-5D-5L, IIRS, PHQ9, MoCA, CFS                                                                            |                 | <b>Months 0, 6, 12</b> |             |



## Measurement of dialysis adequacy

Details of the method of measuring dialysis adequacy are provided in Supplementary Material

1. The dialysis dosing adjustment will be carried out monthly using Std Kt/V calculated by this method. For patients dialysing thrice weekly (Monday/Wednesday/Friday or Tuesday/Thursday/Saturday) the Monday/Tuesday session is considered to be session 1 of the week (HD1) and the Wednesday/Thursday session is considered session 2 of the week (HD2). For patients dialysing twice weekly (Monday/Friday or Tuesday/Saturday) the Friday/Saturday is considered HD1 and the Monday/Tuesday HD2. Blood and urine samples to be taken are shown in Table 2 (Schedule of Events) and in Figure 2. The urine collection and measurement of RKF is performed from HD1 to HD2 and will be calculated from post-HD1 and pre-HD2 serum urea/creatinine, urine volume and urine urea/creatinine concentration as per the equations in the Supplementary Material 1. The measurement of dialysis dose is calculated from dialysis session data (pre- and post-weight HD2 weight, Watson Volume, pre- and post HD2 urea and dialysis session duration (Td) (see Supplementary Material 1 for calculation procedure).

Urine collection will consequently be over approximately three days for twice weekly patients and two days for thrice weekly patients. Although there is a small risk of bias due to longer duration urine collections for twice weekly HD patients, this is likely to be balanced by the incentive for these patients to provide complete urine collections to ensure their dialysis intensity is not increased.

## Sample size

Retrospective studies suggest that decline of RKF may be attenuated in patients who receive twice weekly dialysis compared to thrice weekly, and that this effect occurs early such that a difference in RKF at 6 months is likely to be an optimal time point for the basis of a power analysis. Our initial power analysis, based on our own retrospective data[28] indicated an effect size (Cohen's d) of 0.37 calculated from mean and standard deviations of urea clearance slopes in the first 6 months after HD initiation between two groups of patients, one initiating

1  
2  
3 HD twice weekly and the other thrice weekly. Based on this, the sample size for the proposed  
4 definitive RCT would be 180 (90 each arm). If the definitive study were to be carried out using  
5 the same 4 centres, the available incident HD population would be around 600 annually or  
6 1200 over a proposed 2 year recruitment period. We anticipate that 40% of these patients  
7 will meet the eligibility criteria ie 480 patients. To achieve 180 analysable patients at 6 months  
8 following randomisation we will need to recruit 50% of eligible patients assuming a retention  
9 rate of 75% over 6 months.  
10  
11  
12  
13  
14  
15  
16

17 This feasibility study will test these assumptions on effect size, the proportion of incident  
18 patients who can be pre-screened who are eligible to be approached for study consent, the  
19 proportion of patients approached for screening who consent, pass formal screening and  
20 undergo randomisation (recruitability), and the retention rate during the 6 months after  
21 randomisation (retainability). Sample sizes between 24 and 50 have been recommended for  
22 feasibility studies [29, 30]. Initially we chose a sample size of 50 but, because of a higher than  
23 anticipated recovery of renal function in the first few weeks of recruitment, increased this to  
24 54. A sample of this size will enable us to estimate eligibility, recruitability, screen-failure rate  
25 and retainability rate to within a 95% confidence interval of +/- 11-14%.  
26  
27  
28  
29  
30  
31  
32  
33  
34

### 35 Adverse events (AE) and Serious Adverse Events (SAE)

36 All AE will be recorded in an AE log. SAEs will be reported to the CI and sponsors within 24 h  
37 of the research team becoming aware of the event. For the purpose of this study, SAE which  
38 result in death, hospitalisation, MACE, infections requiring antibiotic use, episodes of fluid  
39 overload needing resetting of dry weight, episodes of hyperkalemia (potassium level > 6.5  
40 mmol/L), vascular access events (tunnelled line failures, tunnelled line infections, fistula  
41 thrombosis, fistula stenosis, false aneurysm) will be captured.  
42  
43  
44  
45  
46  
47  
48  
49

### 50 Data Analysis

51 The primary outcome is to evaluate the feasibility of conducting an RCT comparing the effect,  
52 on RKF decline, of incremental and conventional approaches to HD initiation. The study will  
53 be analysed as intention-to-treat. In order to estimate the study power for a future large scale  
54 RCT, estimates of change in RKF in the first 6 and 12 months after dialysis initiation will be  
55 determined.  
56  
57  
58  
59  
60

1  
2  
3  
4  
5 Change in RKF will be determined using several methods. We will calculate, using linear  
6 regression analysis for individual subjects, rate of decline in GFR (mean of urea and creatinine  
7 clearance) for individual subjects and compare means of these rates between incremental  
8 and conventional HD groups with a t test if normally distributed. This effect size will be  
9 important in powering future definitive trials. Using a previously described method we will  
10 employ a mixed effects model to compare rate of decline in GFR between randomisation  
11 groups[28]. As an indicator of RKF, we will compare urine volume data between groups using  
12 similar statistical techniques to the above. We will also compare proportions of patients in  
13 the two groups who have a residual interdialytic urea clearance  $\geq 2$  and  $\geq 3$  ml/min/1.73m<sup>2</sup>  
14 at 6months. In addition, we will estimate RKF (GFR) from monthly measured pre-dialysis  
15 middle molecule concentrations of  $\beta$  trace protein and  $\beta$ 2-microglobulin converted to an  
16 equivalent GFR using the algorithm reported by Wong et al[31]. We will calculate rate of  
17 decline in GFR for individual patients from these middle molecule concentrations and using  
18 regression analysis for individual patient data to determine GFR slope and will compare mean  
19 slope between incremental HD and standard care groups..  
20  
21  
22  
23  
24  
25  
26  
27  
28  
29  
30  
31  
32  
33

34 Data from the EQ-5D-5L, PHQ-9, MoCA, IIRS and CFS will be compared between study arms  
35 with repeated measures parametric or non-parametric tests as appropriate (repeated  
36 measures ANOVA or Friedman tests). Comparison of MACE, vascular access events (access  
37 failure, access intervention, access related infections, fistula stenosis and fistula thrombosis),  
38 hyperkalaemic episodes, fluid overload episodes and lower respiratory tract infection  
39 episodes will be compared between groups using time-to-event analysis by the Nelson-Aalen  
40 approach.  
41  
42  
43  
44  
45  
46  
47  
48  
49

## 50 Discussion

51 Clinical practise guidelines for HD adequacy, update 2006 [32] suggests that reduction of  
52 treatment frequency to less than thrice-weekly should only be considered in patients with  
53 inter-dialytic urea clearance  $>2$ ml/min/1.73m<sup>2</sup> since urea kinetic modelling simulations have  
54 shown that when residual urea clearance is less than this, it is not possible to achieve a weekly  
55 standard Kt/V of 2.0 with twice-weekly dialysis regimens. Hence in this study we have opted  
56  
57  
58  
59  
60

1  
2  
3 for a required inter-dialytic urea clearance (RKF) of  $\geq 3\text{ml/min/1.73m}^2$  BSA prior to  
4 randomisation as an inclusion criterion to provide a safety margin.  
5  
6  
7

8  
9 There are a large number of observational studies [5-18] that compare clinical outcomes of  
10 patients treated with twice-weekly HD with those on conventional thrice-weekly HD regimens  
11 but to date no RCT that compare clinical outcomes of incremental or infrequent HD versus  
12 conventional thrice-weekly HD have been published. Though these studies suggest that the  
13 rate of decline of RKF is slower using infrequent and incremental HD regimens but  
14 prospective, randomised data is not available. Hence it is unclear to what extent the benefits  
15 of incremental and infrequent HD are due to patient selection. Similarly, there are no  
16 comparative data on Quality of Life measures or on patient experience in conventional versus  
17 incremental HD. Mortality risk and survival outcomes have not been reported to be worse in  
18 patients treated with twice-weekly dialysis sessions [9, 13, 16] and a large US study found that  
19 mortality risk was lower in prevalent patients treated with twice-weekly HD, provided there  
20 was adequate RKF [5]. Hence there is a need for a definitive trial of incremental versus  
21 conventional dialysis initiation to define the effects on RKF preservation and patient-reported  
22 outcome and experience.  
23  
24  
25  
26  
27  
28  
29  
30  
31  
32  
33  
34  
35

36 The outcome data of this current study will be used to inform the design of such a future  
37 definitive study. The proposed feasibility study will test assumptions around the effect size,  
38 the eligibility for screening, recruitability, and retainability. Deviations from the assumed  
39 values will alter the design of the definitive study eg number of centres required, eligibility  
40 criteria, primary outcome measure, sample size, and may indicate that a definitive study is  
41 non-viable.  
42  
43  
44  
45  
46  
47

48 It is likely that the outcomes of a definitive study will be important, not only in defining the  
49 potential benefit of incremental HD for patients, but in establishing whether such an  
50 approach may allow optimization of resource use. If dialysis intensity can be reduced for  
51 patients with sufficient RKF with patient benefit, this will liberate dialysis resources that may  
52 permit other patients with high dialysis requirements to dialyse more frequently.  
53  
54  
55  
56  
57  
58  
59  
60

## Abbreviations

**AEs:** Adverse Events

**CFS:** Clinical Frailty Score

**CI:** Chief Investigator

**CRFs:** Case Report Forms

**EQ-5D-5L:** EuroQol - 5D-5L

**ESRD:** End Stage Renal Disease

**HD:** Haemodialysis

**IIRS:** Illness Intrusiveness Rating Scale

**Kt/V:** Urea Clearance normalised to total body water

**MACE:** Major Adverse Cardiac Events

**MoCA:** Montreal Cognitive Assessment

**PHQ-9:** Patient Health Questionnaire 9

**PI:** Principal Investigator

**RCT:** Randomised Controlled Trial

**RKF:** Residual Kidney Function

**SAEs:** Serious Adverse Events

**SUSAR:** Suspected Unexpected Serious Adverse Reaction

## Legends to Figures

**Figure 1.** Flow diagram of clinical trial demonstrating data that will be used to calculate eligibility for screening, screen failure rate, recruitability and retainability.

**Figure 2.** Timing of urine collection and blood tests for dialysis adequacy measurement for patients on twice weekly and thrice weekly HD.

For peer review only

## Contributorship statement

Design of the study and the development of the protocol: EV, RMKK, KF, SS

Trial set up and running of the study, trial governance, data integrity monitoring: EV, DW

Data analysis: EV, RMKK, KF, DW

Principal Investigators: EV, JB, AD, BA

All authors are involved in the steering group of the study and in the analysis and interpretation of the data.

All authors read and approved the final manuscript.

## Competing interests

The authors declare that they have no competing interests. This report is independent research funded by the British Kidney Patient Association & British Renal Society Joint Grants Programme. The views expressed in this publication are those of the authors.

## Funding

This study is funded by the British Kidney Patient Association & British Renal Society Joint Grants Programme (Grant 16-020).

## Acknowledgements

The authors are grateful for the British Kidney Patient Association & British Renal Society Joint Grants Programme for funding this study and for the assistance of our patients in the study design.

## REFERENCES

1. Kalantar-Zadeh, K., et al., *Twice-weekly and incremental hemodialysis treatment for initiation of kidney replacement therapy*. Am J Kidney Dis, 2014. **64**(2): p. 181-6.
2. Davenport, A., *Will incremental hemodialysis preserve residual function and improve patient survival?* Semin Dial, 2015. **28**(1): p. 16-9.
3. Wong, J., et al., *Incremental haemodialysis*. Nephrol Dial Transplant, 2015. **30**(10): p. 1639-48.
4. Gilmore, J., *KDOQI clinical practice guidelines and clinical practice recommendations--2006 updates*. Nephrol Nurs J, 2006. **33**(5): p. 487-8.
5. Hanson, J.A., et al., *Prescription of twice-weekly hemodialysis in the USA*. Am J Nephrol, 1999. **19**(6): p. 625-33.
6. Lin, Y.F., et al., *Comparison of residual renal function in patients undergoing twice-weekly versus three-times-weekly haemodialysis*. Nephrology (Carlton), 2009. **14**(1): p. 59-64.
7. Vilar, E., et al., *Residual renal function improves outcome in incremental haemodialysis despite reduced dialysis dose*. Nephrol Dial Transplant, 2009. **24**(8): p. 2502-10.
8. Supasyndh, O., et al., *Nutritional status of twice and thrice-weekly hemodialysis patients with weekly Kt/V > 3.6*. J Med Assoc Thai, 2009. **92**(5): p. 624-31.
9. Lin, X., et al., *Clinical outcome of twice-weekly hemodialysis patients in shanghai*. Blood Purif, 2012. **33**(1-3): p. 66-72.
10. Milagros Fernandez Lucas, J.L.T., Gloria Ruiz-Roso, Martha Diaz, Viviana Raoch, Fernando Caravaca, Carlos Quereda, *Incremental Hemodialysis Schedule in Patients with Higher Residual Renal Function at the Start of Dialysis*. Advances in Nephrology, 2014. **2014**: p. 6.
11. Zhang, M., et al., *Association of initial twice-weekly hemodialysis treatment with preservation of residual kidney function in ESRD patients*. Am J Nephrol, 2014. **40**(2): p. 140-50.
12. Bieber, B., et al., *Two-times weekly hemodialysis in China: frequency, associated patient and treatment characteristics and Quality of Life in the China Dialysis Outcomes and Practice Patterns study*. Nephrol Dial Transplant, 2014. **29**(9): p. 1770-7.
13. Elamin, S. and H. Abu-Aisha, *Reaching target hemoglobin level and having a functioning arteriovenous fistula significantly improve one year survival in twice weekly hemodialysis*. Arab J Nephrol Transplant, 2012. **5**(2): p. 81-6.
14. Cheng, Y., et al., *Risk of cardiovascular disease in patients on thrice-weekly versus twice-weekly hemodialysis*. Int J Cardiol, 2014. **174**(3): p. 780-3.
15. Lei, G., et al., *Risk of intradialytic hypotension in patients on thrice-weekly versus twice-weekly hemodialysis*. Int J Cardiol, 2014. **174**(3): p. 821-3.
16. Panaput, T., et al., *Dialysis dose and risk factors for death among ESRD patients treated with twice-weekly hemodialysis: a prospective cohort study*. Blood Purif, 2014. **38**(3-4): p. 253-62.
17. Obi, Y., et al., *Incremental Hemodialysis, Residual Kidney Function, and Mortality Risk in Incident Dialysis Patients: A Cohort Study*. Am J Kidney Dis, 2016. **68**(2): p. 256-265.
18. Caria, S., et al., *The incremental treatment of ESRD: a low-protein diet combined with weekly hemodialysis may be beneficial for selected patients*. BMC Nephrol, 2014. **15**: p. 172.
19. Fernandez-Lucas, M., et al., *Maintaining residual renal function in patients on haemodialysis: 5-year experience using a progressively increasing dialysis regimen*. Nefrologia, 2012. **32**(6): p. 767-76.
20. Devins, G.M., *Using the illness intrusiveness ratings scale to understand health-related quality of life in chronic disease*. J Psychosom Res, 2010. **68**(6): p. 591-602.
21. Herdman, M., et al., *Development and preliminary testing of the new five-level version of EQ-5D (EQ-5D-5L)*. Qual Life Res, 2011. **20**(10): p. 1727-36.
22. Nasreddine, Z.S., et al., *The Montreal Cognitive Assessment, MoCA: a brief screening tool for mild cognitive impairment*. J Am Geriatr Soc, 2005. **53**(4): p. 695-9.



- 1  
2  
3  
4  
5  
6  
7  
8  
9  
10  
11  
12  
13  
14  
15  
16  
17  
18  
19  
20  
21  
22  
23  
24  
25  
26  
27  
28  
29  
30  
31  
32  
33  
34  
35  
36  
37  
38  
39  
40  
41  
42  
43  
44  
45  
46  
47  
48  
49  
50  
51  
52  
53  
54  
55  
56  
57  
58  
59  
60
23. Tiffin-Richards, F.E., et al., *The Montreal Cognitive Assessment (MoCA) - a sensitive screening instrument for detecting cognitive impairment in chronic hemodialysis patients*. PLoS One, 2014. **9**(10): p. e106700.
  24. Moorhouse, P. and K. Rockwood, *Frailty and its quantitative clinical evaluation*. J R Coll Physicians Edinb, 2012. **42**(4): p. 333-40.
  25. Alfaadhel, T.A., et al., *Frailty and mortality in dialysis: evaluation of a clinical frailty scale*. Clin J Am Soc Nephrol, 2015. **10**(5): p. 832-40.
  26. Gotch, F.A., *The current place of urea kinetic modelling with respect to different dialysis modalities*. Nephrol Dial Transplant, 1998. **13** Suppl 6: p. 10-4.
  27. Casino, F.G. and T. Lopez, *The equivalent renal urea clearance: a new parameter to assess dialysis dose*. Nephrol Dial Transplant, 1996. **11**(8): p. 1574-81.
  28. Kaja Kamal, R.M., et al., *Initiating haemodialysis twice-weekly as part of an incremental programme may protect residual kidney function*. Nephrol Dial Transplant, 2019. **34**(6): p. 1017-1025.
  29. Julious, S.A., *Sample size of 12 per group rule of thumb for a pilot study*. Pharmaceut. Statist., 2005. **4**: p. 287-291.
  30. Sim, J. and M. Lewis, *The size of a pilot study for a clinical trial should be calculated in relation to considerations of precision and efficiency*. J Clin Epidemiol, 2012. **65**(3): p. 301-8.
  31. Wong, J., et al., *Predicting residual kidney function in hemodialysis patients using serum beta-trace protein and beta2-microglobulin*. Kidney Int, 2016. **89**(5): p. 1090-1098.
  32. Hemodialysis Adequacy Work, G., *Clinical practice guidelines for hemodialysis adequacy, update 2006*. Am J Kidney Dis, 2006. **48** Suppl 1: p. S2-90.

1  
2  
3  
4  
5  
6  
7  
8  
9  
10  
11  
12  
13  
14  
15  
16  
17  
18  
19  
20  
21  
22  
23  
24  
25  
26  
27  
28  
29  
30  
31  
32  
33  
34  
35  
36  
37  
38  
39  
40  
41  
42  
43  
44  
45  
46  
47  
48  
49  
50  
51  
52  
53  
54  
55  
56  
57  
58  
59  
60

For peer review only

1  
2  
3  
4  
5  
6 Enrolment  
7  
8  
9  
10  
11  
12 Allocation  
13  
14  
15  
16  
17  
18  
19  
20  
21  
22  
23  
24  
25  
26  
27 Follow-up  
28  
29  
30  
31  
32  
33  
34  
35  
36  
37  
38 Analysis  
39  
40  
41  
42  
43  
44  
45  
46  
47  
48





1  
2  
3  
4  
5  
6  
7  
8  
9  
10  
11  
12  
13  
14  
15  
16  
17  
18  
19  
20  
21  
22  
23  
24  
25  
26  
27  
28  
29  
30  
31  
32  
33  
34  
35  
36  
37  
38  
39  
40  
41

## Supplementary material

### Method of calculation of dialysis standard Kt/V taking into account ultrafiltration weight (Daugirdas methodology)

STEP 1: Calculate spKt/V not taking into account fluid removal

$$spKt/V = \ln \left( \frac{C_{pre}}{C_{post}} \right) \quad (\text{EQUATION 1})$$

Where  $C_{pre}$  is urea concentration pre-dialysis and  $C_{post}$  is urea concentration post dialysis

STEP 2: Calculate eKt/V not taking into account fluid removal using Tattersall transformation

In this calculation the Tattersall time constant is modified from 35 mins to 30.7mins as per modifications recommended by Daugirdas (Kidney International (2010) 77, 637–644)

$$eKt/V = spKt/V \text{ from step 1} * \frac{\left(\frac{Td}{60}\right)}{(Td \times 60 + 30.7)} \quad (\text{EQUATION 2})$$

Where  $Td$  is dialysis duration expressed in hours

STEP 3: Calculate Adjusted Watson Volume

Watson  $V$  needs to be downsized by 10% to account for higher modelled  $V$  compared to anthropometric Watson  $V$  (Daugirdas Kidney International (2010) 77, 637–644).

Calculate Watson Volume by standard equation and downgrade by 10%

$$\text{Adjusted Watson } V = \text{Watson } V * 0.9 \quad (\text{EQUATION 3})$$

STEP 4: Calculate Leypoldt standard Kt/V

In this we employ eKt/V from equation 2. This equation for standard Kt/V does not account for UF volume. Leypoldt equation is as below (Leypoldt JK. Hemodial Int 2004; 8: 193–197. and Daugirdas Kidney International (2010) 77, 637–644):

$$stdKt/V = \frac{10,080 \frac{1 - e^{-eKt/V}}{t}}{\frac{1 - e^{-eKt/V}}{eKt/V} + \frac{10,080}{Ft} - 1} \quad (\text{EQUATION 4})$$

Where f=frequency, t=dialysis time, eKt/V is results from **Equation 2**

STEP 5: Calculate Standard Kt/V taking into account UF weight using Daugirdas methodology:

$$stK_d t/V = S / (1 - (0.74/F) \cdot UF_w/V) \quad (\text{EQUATION 5})$$

(equation 2 from Daugirdas et al, Kidney International (2010) 77, 637–644)

where S=StdKt/V from EQUATION 4, F=frequency (sessions/week), UF<sub>w</sub>=weekly fluid gain between HD sessions, V=adjusted Watson V from **Equation 3**

### CALCULATION OF RESIDUAL RENAL FUNCTION STANDARD Kt/V

STEP 1: Calculate Urea clearance

$$\text{Urea clearance} = \frac{\text{UrineVol} \times 1000 \times \text{UreaUrea}}{\left( \frac{\text{UrineDuration} \times 24 \times 60 - (\text{Td} \times 60)}{2} \right) \left( \frac{\text{PostUrea} + \text{PreUrea}}{2} \right)} \quad (\text{EQUATION 6})$$

Where urea clearance units are ml/min, UrineVol=urine volume (L), UrineUrea=urine urea concentration (mmol/L), UrineDuration=Urine collection duration (whole days between HD session), Td=dialysis duration (hours), PostUrea=Blood urea concentration at end of HD when urine collection starts (mmol/L), PreUrea= Blood urea concentration at start of HD when urine collection ends (mmol/L).

This equation assumes that dialysis is occurring at regular time points and utilises duration of urine collection as days between HD sessions minus dialysis duration.

Step 2: Calculate urea clearance corrected for body surface area (used for screening process of study but not for calculation of Std Kt/V which uses unadjusted urea clearance

BSA=Dubois BSA (m<sup>2</sup>)

$$\text{BSA} = 0.007184 * \text{Height in cm}^{0.725} * \text{Weight in Kg}^{0.425} \quad (\text{EQUATION 7})$$

$$\text{Urea clearance adjusted for BSA} = \text{Urea clearance} * 1.73/\text{BSA} \quad (\text{EQUATION 8})$$

Step 3: Calculate Adjustment factor needed to downgrade urea clearance so it can be used to calculate Standard Kt/V

This method applies a multiplier to Urea Clearance to downgrade it so that it is appropriately incorporated into the Standard Kt/V calculation (fkru=approximately 0.7, or 70%)

$$f_{KrU} = \frac{0.974}{(spKt/V + 1.62) + 0.4} \quad \text{(EQUATION 9)}$$

(from Daugirdas Kidney International (2010) 77, 637–644). SpKt/V is that from **Equation 1**

Step 4: Adjust Urea clearance for incorporation into Standard Kt/V

$$\text{Adjusted KrU} = \text{Urea clearance} * f_{KrU} \quad \text{(EQUATION 10)}$$

Where Urea clearance is from equation 6 and fKrU is from **equation 9**

From equation 4 in Daugirdas, Kidney International (2010) 77, 637–644

Step 5: Calculate Residual Renal Function equivalent Standard Kt/V

This is calculated as  $K * t / V$  where  $K = \text{adjusted KrU}$ ,  $t = \text{minutes in 7 days}$ ,  $V = \text{Adjusted Watson Volume}$

$$\text{Residual Renal Standard Kt/V} = \frac{\text{Adjusted KrU} \times 10080}{\text{Adjusted Watson Volume} \times 1000} \quad \text{(EQUATION 11)}$$

from equation 5 in Daugirdas Kidney International (2010) 77, 637–644

Where Adjusted KrU is from equation 10 (ml/min) and Adjusted Watson Volume (L) is from **Equation 3** above.

## Participant Information Sheet

### **Does incremental initiation of haemodialysis preserve native kidney function? A multicentre feasibility randomised controlled trial.**

You are being invited to take part in a research study. Before you decide, it is important that you understand why the research is being done and what it will involve. Please take time to read the following information carefully and discuss it with friends, relatives, your GP or staff on the Renal Unit if you wish. Ask us if there is anything that is not clear, or if you would like more information. Take time to decide whether or not you wish to take part.

#### **What is the purpose of the study?**

Patients who start haemodialysis usually retain some natural kidney function for months or years after starting dialysis. Even a small amount of this natural kidney function can be helpful in reducing the need for dietary and fluid restriction. There is also good evidence that retaining a small amount of natural kidney function may provide a survival benefit for patients on dialysis.

Most patients who commence haemodialysis start three times per week for 3.5-4 hours per session, irrespective of the amount of natural kidney function they may have. An alternative approach used in some kidney units is to take account of the natural kidney function in prescribing the amount of dialysis. This may allow patients to start treatment needing to spend less time on dialysis or even to start just twice weekly. The amount of dialysis can be adjusted over time as natural kidney function declines. This is called "incremental haemodialysis". Both of these approaches are considered to be standard care although it is not known which approach is more beneficial to patients.

There are some suggestions that the frequency of dialysis may influence the rate of decline of natural kidney function but this need to be tested in a large randomised study. To inform the design of such a study, a smaller scale feasibility study is required.

We intend to randomise fifty new starters on haemodialysis with adequate natural kidney function into two groups – a group who will have dialysis prescribed in the standard fashion – three times weekly for 3.5-4 hours per session or a group who will have an incremental start beginning with twice weekly treatment. We will investigate how many patients have sufficient natural kidney function to be eligible, whether patients are willing to participate and continue in the study, compare the rate of loss of kidney function between groups, and ascertain whether this individualised dialysis approach is less intrusive to patients. The results will be used to design a larger definitive study.



### **Why have I been asked to participate?**

You have been invited to participate as you are on a haemodialysis programme within the United Kingdom.

### **Do I have to take part?**

It is up to you to decide whether or not to take part. If you do decide to take part you will be given this information sheet to keep, and be asked to sign a consent form. If you decide to take part you are still free to withdraw at any time and without giving a reason. This would not affect the standard of care you receive.

### **What will happen to me if I take part?**

If you decide to take part we will need your permission for the local research nurse and consultant nephrologist to look at your medical records. If you are a female of child bearing age we will need to ensure you are not pregnant with a pregnancy test. You will be randomly allocated to one of two study groups. The amount of dialysis you receive (frequency and time) will depend on which study group you are randomised to.

If you are randomised to standard three times a week dialysis (3.5-4h), then you will be requested to have dialysis using that schedule.

If you are randomised to have incremental dialysis, you will dialyse twice weekly initially and afterwards the amount of dialysis you receive will be then adjusted according to the amount of natural kidney function you have. This may mean increasing the amount of time on dialysis up to 4 hours, or increasing to three times a week dialysis during the study.

We will arrange for a blood sample to be taken for the study at the beginning and end of a dialysis session every month with your routine monthly blood tests. The samples will be securely stored in the laboratory for further analysis of blood markers that indicate level of natural kidney function. We will also measure your weight and blood pressure as part of dialysis care. We will ask you to collect all of your urine in a special container between two consecutive dialysis sessions every month.

You will be asked to complete a series of questionnaires in regards to your health and wellbeing before starting the study, visit 6 and end of the study.

We will also monitor you regularly in regards to fluid status, potassium level, dialysis requirements.

During the study we will see you prior to the study and each month to assess your dialysis quality (total of 13 times). We will see you during a dialysis session for your convenience.

### **What are the possible benefits of taking part?**

It is unknown whether dialysis three times a week or in an individualised way (incremental dialysis) is best to preserve natural kidney function and we hope that this study will give us this information. It may be that you are randomised to a study group which benefits you from this perspective but it is not possible to be certain of this. There are no other direct benefits to you of taking part but it is hoped that information we get from this study may help us in the future to improve treatment for patients on dialysis.

### **What happens when the research study stops?**

At the end of the research, your medical care will continue as usual.

### **What will happen if I don't want to carry on with the study?**

You may withdraw from the study at any time, without having to explain why, and we will completely respect your decision. If you withdraw from the study, no other samples will be collected from you and we will not contact you again. Information already collected would be retained and used in the study with your consent. The samples which were already collected and the data collected would be used in the study with your consent. If you wish us not to use the information we will respect it. Your clinical care will not be affected by either taking part or by your withdrawal from the study.

### **Are there any risks to me?**

Only patients with an appropriate natural kidney function are recruited into this study to minimise any potential risks such as inadequate dialysis, fluid overload, and high potassium levels. All recruited participants will be closely monitored at least once a month to check for the above risks. Any concerns from participants or haemodialysis staff will be addressed promptly.

As part of the research study, a small blood sample (~20ml, 4 teaspoons) will be required each month in addition to your routine monthly blood tests and this will be taken from you on dialysis. The amount of blood taken is small and will not have any negative impact on your health.

Taking part in the study will not affect your current treatment, nor will it affect your ability to obtain insurance for health purposes or receive a kidney transplant if appropriate.

### **What will happen to my data that we collect?**

Baseline information including age, gender, duration of dialysis and other health information will be collected and your data will then be allocated a unique code that will be anonymous. Medical notes may be looked at by responsible individuals from the Sponsor organisation, the NHS Trust, external researchers from the University of Hertfordshire and from regulatory authorities. During follow up the data will be updated to include any changes in your health such as heart attacks and stroke. At the end of the study your data and any health outcomes will be analysed.

Anonymised study data and files will be stored for the duration of the study and up to 5 years. Your personal data collected by the site, will be stored at the site and archived with other study specific documents for at least 5 years after completion or discontinuation of the study.

### **If I participate will my personal medical information be kept confidential?**

All information that is collected about you during the course of the project will be kept strictly confidential. All collected samples will be identified by a code number only. All data collected as part of the study will be de-identified.

If you consent to take part in the research, some parts of your medical records and any of the information collected about you may be inspected by the sponsor (East and North Hertfordshire NHS Trust). Your records may also be looked at by the regulatory authorities or ethics committees to check that the study is being carried out correctly. All those involved with the study will have a duty of confidentiality to you as a research participant and nothing that could reveal your identity will be disclosed outside of the research team.

### **What would happen to the results of the research study?**

We hope to be able to publish the results of this research and will be happy to provide you with a copy of the publication if you request it. You will not be identifiable in this publication. We will be happy to inform you of the summarised study results by postal letter if you wish to receive it.

Individual data will not be made available to participants unless the results could potentially impact on the individual's clinical care. Results would then be shared with the participant and their dialysis doctor. This decision would be made by the Principal investigator at your hospital.

### **Will I be paid for taking part in the study?**

Participation in this study is voluntary and you will not be paid for taking part.

### **Will my GP be informed?**

Yes, your GP will be informed with your consent that you are involved in this study.

### **What if new information becomes available?**

Sometimes during the course of a research project, new information becomes available about the treatment that is being studied. If this happens, the research team will tell you about it and discuss with you whether you want to continue in the study.

### **Who has reviewed the study?**

The study has been reviewed by the East of England – Cambridge South Research Ethics Committee.

### **Who is organising and funding the research?**

This is a multicentre study within the UK funded by The British Renal Society and sponsored by East and North Hertfordshire NHS Trust.

### **What if something goes wrong?**

If you have a concern about any aspect of this study, you should ask to speak with the study doctor/nurse who will do their best to answer your questions.

If you are harmed due to someone's negligence, then you may have grounds for a legal action but you may have to pay your own legal costs. If you wish to complain, or have any concerns about any aspect of the way you have been approached or treated during the course of this study, the normal National Health Service complaints mechanism will be available to you. Formal complaints should be addressed to:

Mr Nick Carver, Chief Executive, Lister Hospital, Corey's Mill Lane, Stevenage, SG1 4AB (Tel: 01438 314333).

Should you require independent advice about making a complaint or seeking compensation, you may wish to contact the Independent Complaints Advocacy Service (ICAS) for Bedfordshire & Hertfordshire at Pohwer ICAS, Hertlands House, Primett Road, Stevenage, Herts, SG1 3EE. Tel: (0845 456 1082).

1  
2  
3 Independent information and advice is available from the Patient advice and liaison service  
4 (PALS).  
5

6 Please contact: 01438 284678 or call 01438 314333 and ask to speak to the PALS.  
7

8 Alternatively please email [pals.enh-tr@nhs.net](mailto:pals.enh-tr@nhs.net)  
9

### 10 **Contact for Further Information**

11  
12 If you have any problems, concerns, complaints or other questions about this study, you  
13 should contact:  
14  
15

16 **Principal Investigator:** Dr Raja Mohammed Kaja Kamal on 01438 284346

17 **Chief Investigator:** Dr Enric Vilar on 01438 286366

18 **Research Nurses:** Ewa Kislowska, Jocelyn Berdeprado on 01438 284346  
19  
20

### 21 **Emergency 24 hour contact number:**

22  
23 If you need to contact someone outside of normal office hours please call the hospital  
24 switchboard on **01438 314 333 and ask to speak to the doctor on-call.**  
25  
26  
27  
28  
29  
30

31 **Thank you very much for taking the time to read this information sheet**  
32  
33  
34  
35  
36  
37  
38  
39  
40  
41  
42  
43  
44  
45  
46  
47  
48  
49  
50  
51  
52  
53  
54  
55  
56  
57  
58  
59  
60

Lister Hospital, Corey's Mill Lane, Stevenage  
Hertfordshire SG1 4AB  
Tel: 01438 314333

PARTICIPANT NAME .....

PARTICIPANT IDENTIFICATION NUMBER .....

### INFORMED CONSENT FORM

**Does incremental initiation of haemodialysis preserve native kidney function? A multicentre feasibility randomised control trial.**

INVESTIGATOR: \_\_\_\_\_

Please initial

- 1. I confirm that I have read and understood the Participant Information Sheet version \_\_\_\_\_ date \_\_\_\_\_ for the above study and have had the opportunity to ask questions which have been answered to my satisfaction.
- 2. I understand that my participation is voluntary and that I am free to withdraw at any time, without giving any reason, without my medical care or legal rights being affected.
- 3. I understand that sections of my medical notes may be looked at by responsible individuals from the Sponsor organisation, the NHS Trust, external researchers from the University of Hertfordshire and from regulatory authorities for regulatory purposes and audit. I give permission for these individuals to have access to my records.
- 4. I understand if sections of my medical notes are unclear, the research team may contact my GP for clarification. I give permission for the research team to contact my GP for this purpose.
- 5. I give permission for additional blood and urine samples to be collected and used for research purposes. I understand these samples will be stored anonymously for analysis and a portion of the sample will be sent to an external institution for analysis. The stored samples may be used in future research.
- 6. I agree to take part in the above study.

Name of patient .....

Date .....

Signature .....

Name of Person Taking Consent .....

Date .....

Signature .....

**Three copies required: one for the patient, one for the researcher and one for hospital case notes**

# Reporting checklist for protocol of a clinical trial.

Based on the SPIRIT guidelines.

## Instructions to authors

Complete this checklist by entering the page numbers from your manuscript where readers will find each of the items listed below.

Your article may not currently address all the items on the checklist. Please modify your text to include the missing information. If you are certain that an item does not apply, please write "n/a" and provide a short explanation.

Upload your completed checklist as an extra file when you submit to a journal.

In your methods section, say that you used the SPIRIT reporting guidelines, and cite them as:

Chan A-W, Tetzlaff JM, Altman DG, Laupacis A, Gøtzsche PC, Krleža-Jerić K, Hróbjartsson A, Mann H, Dickersin K, Berlin J, Doré C, Parulekar W, Summerskill W, Groves T, Schulz K, Sox H, Rockhold FW, Rennie D, Moher D. SPIRIT 2013 Statement: Defining standard protocol items for clinical trials. *Ann Intern Med.* 2013;158(3):200-207

|                                             |                     | Reporting Item                                                                                               | Page Number |
|---------------------------------------------|---------------------|--------------------------------------------------------------------------------------------------------------|-------------|
| <b>Administrative information</b>           |                     |                                                                                                              |             |
| Title                                       | <a href="#">#1</a>  | Descriptive title identifying the study design, population, interventions, and, if applicable, trial acronym | 1           |
| Trial registration                          | <a href="#">#2a</a> | Trial identifier and registry name. If not yet registered, name of intended registry                         | 2           |
| Trial registration: data set                | <a href="#">#2b</a> | All items from the World Health Organization Trial Registration Data Set                                     | N/A         |
| Protocol version                            | <a href="#">#3</a>  | Date and version identifier                                                                                  | N/A         |
| Funding                                     | <a href="#">#4</a>  | Sources and types of financial, material, and other support                                                  | 5           |
| Roles and responsibilities: contributorship | <a href="#">#5a</a> | Names, affiliations, and roles of protocol contributors                                                      | 13          |

|    |                           |                     |                                                                      |     |
|----|---------------------------|---------------------|----------------------------------------------------------------------|-----|
| 1  | Roles and                 | <a href="#">#5b</a> | Name and contact information for the trial sponsor                   | 5   |
| 2  | responsibilities:         |                     |                                                                      |     |
| 3  | sponsor contact           |                     |                                                                      |     |
| 4  | information               |                     |                                                                      |     |
| 5  |                           |                     |                                                                      |     |
| 6  |                           |                     |                                                                      |     |
| 7  |                           |                     |                                                                      |     |
| 8  | Roles and                 | <a href="#">#5c</a> | Role of study sponsor and funders, if any, in study design;          | 13  |
| 9  | responsibilities:         |                     | collection, management, analysis, and interpretation of data;        |     |
| 10 | sponsor and funder        |                     | writing of the report; and the decision to submit the report for     |     |
| 11 |                           |                     | publication, including whether they will have ultimate authority     |     |
| 12 |                           |                     | over any of these activities                                         |     |
| 13 |                           |                     |                                                                      |     |
| 14 |                           |                     |                                                                      |     |
| 15 |                           |                     |                                                                      |     |
| 16 | Roles and                 | <a href="#">#5d</a> | Composition, roles, and responsibilities of the coordinating centre, | 13  |
| 17 | responsibilities:         |                     | steering committee, endpoint adjudication committee, data            |     |
| 18 | committees                |                     | management team, and other individuals or groups overseeing the      |     |
| 19 |                           |                     | trial, if applicable (see Item 21a for data monitoring committee)    |     |
| 20 |                           |                     |                                                                      |     |
| 21 |                           |                     |                                                                      |     |
| 22 |                           |                     |                                                                      |     |
| 23 | <b>Introduction</b>       |                     |                                                                      |     |
| 24 |                           |                     |                                                                      |     |
| 25 | Background and            | <a href="#">#6a</a> | Description of research question and justification for undertaking   | 4,5 |
| 26 | rationale                 |                     | the trial, including summary of relevant studies (published and      |     |
| 27 |                           |                     | unpublished) examining benefits and harms for each intervention      |     |
| 28 |                           |                     |                                                                      |     |
| 29 |                           |                     |                                                                      |     |
| 30 | Background and            | <a href="#">#6b</a> | Explanation for choice of comparators                                | 13  |
| 31 | rationale: choice of      |                     |                                                                      |     |
| 32 | comparators               |                     |                                                                      |     |
| 33 |                           |                     |                                                                      |     |
| 34 |                           |                     |                                                                      |     |
| 35 |                           |                     |                                                                      |     |
| 36 | Objectives                | <a href="#">#7</a>  | Specific objectives or hypotheses                                    | 6   |
| 37 |                           |                     |                                                                      |     |
| 38 | Trial design              | <a href="#">#8</a>  | Description of trial design including type of trial (eg, parallel    | 5   |
| 39 |                           |                     | group, crossover, factorial, single group), allocation ratio, and    |     |
| 40 |                           |                     | framework (eg, superiority, equivalence, non-inferiority,            |     |
| 41 |                           |                     | exploratory)                                                         |     |
| 42 |                           |                     |                                                                      |     |
| 43 |                           |                     |                                                                      |     |
| 44 |                           |                     |                                                                      |     |
| 45 | <b>Methods:</b>           |                     |                                                                      |     |
| 46 | <b>Participants,</b>      |                     |                                                                      |     |
| 47 | <b>interventions, and</b> |                     |                                                                      |     |
| 48 | <b>outcomes</b>           |                     |                                                                      |     |
| 49 |                           |                     |                                                                      |     |
| 50 |                           |                     |                                                                      |     |
| 51 | Study setting             | <a href="#">#9</a>  | Description of study settings (eg, community clinic, academic        | 5   |
| 52 |                           |                     | hospital) and list of countries where data will be collected.        |     |
| 53 |                           |                     | Reference to where list of study sites can be obtained               |     |
| 54 |                           |                     |                                                                      |     |
| 55 |                           |                     |                                                                      |     |
| 56 |                           |                     |                                                                      |     |
| 57 | Eligibility criteria      | <a href="#">#10</a> | Inclusion and exclusion criteria for participants. If applicable,    | 7   |
| 58 |                           |                     | eligibility criteria for study centres and individuals who will      |     |
| 59 |                           |                     |                                                                      |     |
| 60 |                           |                     |                                                                      |     |

|    |                              |                                                                                          |          |
|----|------------------------------|------------------------------------------------------------------------------------------|----------|
|    |                              | perform the interventions (eg, surgeons, psychotherapists)                               |          |
| 1  |                              |                                                                                          |          |
| 2  | Interventions:               | <a href="#">#11a</a> Interventions for each group with sufficient detail to allow        | 9        |
| 3  | description                  | replication, including how and when they will be administered                            |          |
| 4  |                              |                                                                                          |          |
| 5  | Interventions:               | <a href="#">#11b</a> Criteria for discontinuing or modifying allocated interventions for | 10       |
| 6  | modifications                | a given trial participant (eg, drug dose change in response to                           |          |
| 7  |                              | harms, participant request, or improving / worsening disease)                            |          |
| 8  |                              |                                                                                          |          |
| 9  | Interventions:               | <a href="#">#11c</a> Strategies to improve adherence to intervention protocols, and any  | 10       |
| 10 | adherence                    | procedures for monitoring adherence (eg, drug tablet return;                             |          |
| 11 |                              | laboratory tests)                                                                        |          |
| 12 | Interventions:               | <a href="#">#11d</a> Relevant concomitant care and interventions that are permitted or   | 9        |
| 13 | concomitant care             | prohibited during the trial                                                              |          |
| 14 |                              |                                                                                          |          |
| 15 | Outcomes                     | <a href="#">#12</a> Primary, secondary, and other outcomes, including the specific       | 6, Table |
| 16 |                              | measurement variable (eg, systolic blood pressure), analysis metric                      | 1        |
| 17 |                              | (eg, change from baseline, final value, time to event), method of                        |          |
| 18 |                              | aggregation (eg, median, proportion), and time point for each                            |          |
| 19 |                              | outcome. Explanation of the clinical relevance of chosen efficacy                        |          |
| 20 |                              | and harm outcomes is strongly recommended                                                |          |
| 21 | Participant timeline         | <a href="#">#13</a> Time schedule of enrolment, interventions (including any run-ins     | Table 2, |
| 22 |                              | and washouts), assessments, and visits for participants. A                               | Figure 1 |
| 23 |                              | schematic diagram is highly recommended (see Figure)                                     |          |
| 24 |                              |                                                                                          |          |
| 25 | Sample size                  | <a href="#">#14</a> Estimated number of participants needed to achieve study             | 10       |
| 26 |                              | objectives and how it was determined, including clinical and                             |          |
| 27 |                              | statistical assumptions supporting any sample size calculations                          |          |
| 28 |                              |                                                                                          |          |
| 29 | Recruitment                  | <a href="#">#15</a> Strategies for achieving adequate participant enrolment to reach     | 6, 8     |
| 30 |                              | target sample size                                                                       |          |
| 31 |                              |                                                                                          |          |
| 32 |                              |                                                                                          |          |
| 33 |                              |                                                                                          |          |
| 34 |                              |                                                                                          |          |
| 35 |                              |                                                                                          |          |
| 36 |                              |                                                                                          |          |
| 37 |                              |                                                                                          |          |
| 38 |                              |                                                                                          |          |
| 39 |                              |                                                                                          |          |
| 40 |                              |                                                                                          |          |
| 41 |                              |                                                                                          |          |
| 42 |                              |                                                                                          |          |
| 43 |                              |                                                                                          |          |
| 44 |                              |                                                                                          |          |
| 45 | <b>Methods: Assignment</b>   |                                                                                          |          |
| 46 | <b>of interventions (for</b> |                                                                                          |          |
| 47 | <b>controlled trials)</b>    |                                                                                          |          |
| 48 |                              |                                                                                          |          |
| 49 |                              |                                                                                          |          |
| 50 | Allocation: sequence         | <a href="#">#16a</a> Method of generating the allocation sequence (eg, computer-         | 8        |
| 51 | generation                   | generated random numbers), and list of any factors for                                   |          |
| 52 |                              | stratification. To reduce predictability of a random sequence,                           |          |
| 53 |                              | details of any planned restriction (eg, blocking) should be provided                     |          |
| 54 |                              | in a separate document that is unavailable to those who enrol                            |          |
| 55 |                              | participants or assign interventions                                                     |          |
| 56 |                              |                                                                                          |          |
| 57 |                              |                                                                                          |          |
| 58 |                              |                                                                                          |          |
| 59 |                              |                                                                                          |          |
| 60 |                              |                                                                                          |          |



|    |                        |                      |                                                                       |        |
|----|------------------------|----------------------|-----------------------------------------------------------------------|--------|
| 1  | Allocation             | <a href="#">#16b</a> | Mechanism of implementing the allocation sequence (eg, central        | 8      |
| 2  | concealment            |                      | telephone; sequentially numbered, opaque, sealed envelopes),          |        |
| 3  | mechanism              |                      | describing any steps to conceal the sequence until interventions are  |        |
| 4  |                        |                      | assigned                                                              |        |
| 5  |                        |                      |                                                                       |        |
| 6  |                        |                      |                                                                       |        |
| 7  |                        |                      |                                                                       |        |
| 8  | Allocation:            | <a href="#">#16c</a> | Who will generate the allocation sequence, who will enrol             | 8      |
| 9  | implementation         |                      | participants, and who will assign participants to interventions       |        |
| 10 |                        |                      |                                                                       |        |
| 11 | Blinding (masking)     | <a href="#">#17a</a> | Who will be blinded after assignment to interventions (eg, trial      | N/A    |
| 12 |                        |                      | participants, care providers, outcome assessors, data analysts), and  |        |
| 13 |                        |                      | how                                                                   |        |
| 14 |                        |                      |                                                                       |        |
| 15 |                        |                      |                                                                       |        |
| 16 |                        |                      |                                                                       |        |
| 17 | Blinding (masking):    | <a href="#">#17b</a> | If blinded, circumstances under which unblinding is permissible,      | N/A    |
| 18 | emergency unblinding   |                      | and procedure for revealing a participant's allocated intervention    |        |
| 19 |                        |                      | during the trial                                                      |        |
| 20 |                        |                      |                                                                       |        |
| 21 |                        |                      |                                                                       |        |
| 22 | <b>Methods: Data</b>   |                      |                                                                       |        |
| 23 | <b>collection,</b>     |                      |                                                                       |        |
| 24 | <b>management, and</b> |                      |                                                                       |        |
| 25 | <b>analysis</b>        |                      |                                                                       |        |
| 26 |                        |                      |                                                                       |        |
| 27 |                        |                      |                                                                       |        |
| 28 |                        |                      |                                                                       |        |
| 29 | Data collection plan   | <a href="#">#18a</a> | Plans for assessment and collection of outcome, baseline, and         | 10     |
| 30 |                        |                      | other trial data, including any related processes to promote data     |        |
| 31 |                        |                      | quality (eg, duplicate measurements, training of assessors) and a     |        |
| 32 |                        |                      | description of study instruments (eg, questionnaires, laboratory      |        |
| 33 |                        |                      | tests) along with their reliability and validity, if known. Reference |        |
| 34 |                        |                      | to where data collection forms can be found, if not in the protocol   |        |
| 35 |                        |                      |                                                                       |        |
| 36 |                        |                      |                                                                       |        |
| 37 |                        |                      |                                                                       |        |
| 38 |                        |                      |                                                                       |        |
| 39 | Data collection plan:  | <a href="#">#18b</a> | Plans to promote participant retention and complete follow-up,        | 10     |
| 40 | retention              |                      | including list of any outcome data to be collected for participants   |        |
| 41 |                        |                      | who discontinue or deviate from intervention protocols                |        |
| 42 |                        |                      |                                                                       |        |
| 43 |                        |                      |                                                                       |        |
| 44 | Data management        | <a href="#">#19</a>  | Plans for data entry, coding, security, and storage, including any    | 10     |
| 45 |                        |                      | related processes to promote data quality (eg, double data entry;     |        |
| 46 |                        |                      | range checks for data values). Reference to where details of data     |        |
| 47 |                        |                      | management procedures can be found, if not in the protocol            |        |
| 48 |                        |                      |                                                                       |        |
| 49 |                        |                      |                                                                       |        |
| 50 |                        |                      |                                                                       |        |
| 51 | Statistics: outcomes   | <a href="#">#20a</a> | Statistical methods for analysing primary and secondary outcomes.     | 11, 12 |
| 52 |                        |                      | Reference to where other details of the statistical analysis plan can |        |
| 53 |                        |                      | be found, if not in the protocol                                      |        |
| 54 |                        |                      |                                                                       |        |
| 55 |                        |                      |                                                                       |        |
| 56 | Statistics: additional | <a href="#">#20b</a> | Methods for any additional analyses (eg, subgroup and adjusted        | 11, 12 |
| 57 | analyses               |                      | analyses)                                                             |        |
| 58 |                        |                      |                                                                       |        |
| 59 |                        |                      |                                                                       |        |
| 60 |                        |                      |                                                                       |        |

|    |                            |                      |                                                                       |        |
|----|----------------------------|----------------------|-----------------------------------------------------------------------|--------|
| 1  | Statistics: analysis       | <a href="#">#20c</a> | Definition of analysis population relating to protocol non-           | 11, 12 |
| 2  | population and missing     |                      | adherence (eg, as randomised analysis), and any statistical           |        |
| 3  | data                       |                      | methods to handle missing data (eg, multiple imputation)              |        |
| 4  |                            |                      |                                                                       |        |
| 5  |                            |                      |                                                                       |        |
| 6  | <b>Methods: Monitoring</b> |                      |                                                                       |        |
| 7  |                            |                      |                                                                       |        |
| 8  | Data monitoring:           | <a href="#">#21a</a> | Composition of data monitoring committee (DMC); summary of            | 5      |
| 9  | formal committee           |                      | its role and reporting structure; statement of whether it is          |        |
| 10 |                            |                      | independent from the sponsor and competing interests; and             |        |
| 11 |                            |                      | reference to where further details about its charter can be found, if |        |
| 12 |                            |                      | not in the protocol. Alternatively, an explanation of why a DMC is    |        |
| 13 |                            |                      | not needed                                                            |        |
| 14 |                            |                      |                                                                       |        |
| 15 | Data monitoring:           | <a href="#">#21b</a> | Description of any interim analyses and stopping guidelines,          | 5      |
| 16 | interim analysis           |                      | including who will have access to these interim results and make      |        |
| 17 |                            |                      | the final decision to terminate the trial                             |        |
| 18 |                            |                      |                                                                       |        |
| 19 |                            |                      |                                                                       |        |
| 20 | Harms                      | <a href="#">#22</a>  | Plans for collecting, assessing, reporting, and managing solicited    | 11     |
| 21 |                            |                      | and spontaneously reported adverse events and other unintended        |        |
| 22 |                            |                      | effects of trial interventions or trial conduct                       |        |
| 23 |                            |                      |                                                                       |        |
| 24 |                            |                      |                                                                       |        |
| 25 | Auditing                   | <a href="#">#23</a>  | Frequency and procedures for auditing trial conduct, if any, and      | N/A    |
| 26 |                            |                      | whether the process will be independent from investigators and the    |        |
| 27 |                            |                      | sponsor                                                               |        |
| 28 |                            |                      |                                                                       |        |
| 29 |                            |                      |                                                                       |        |
| 30 |                            |                      |                                                                       |        |
| 31 |                            |                      |                                                                       |        |
| 32 |                            |                      |                                                                       |        |
| 33 |                            |                      |                                                                       |        |
| 34 | <b>Ethics and</b>          |                      |                                                                       |        |
| 35 | <b>dissemination</b>       |                      |                                                                       |        |
| 36 |                            |                      |                                                                       |        |
| 37 |                            |                      |                                                                       |        |
| 38 | Research ethics            | <a href="#">#24</a>  | Plans for seeking research ethics committee / institutional review    | 2, 5   |
| 39 | approval                   |                      | board (REC / IRB) approval                                            |        |
| 40 |                            |                      |                                                                       |        |
| 41 |                            |                      |                                                                       |        |
| 42 | Protocol amendments        | <a href="#">#25</a>  | Plans for communicating important protocol modifications (eg,         | N/A    |
| 43 |                            |                      | changes to eligibility criteria, outcomes, analyses) to relevant      |        |
| 44 |                            |                      | parties (eg, investigators, REC / IRBs, trial participants, trial     |        |
| 45 |                            |                      | registries, journals, regulators)                                     |        |
| 46 |                            |                      |                                                                       |        |
| 47 |                            |                      |                                                                       |        |
| 48 |                            |                      |                                                                       |        |
| 49 | Consent or assent          | <a href="#">#26a</a> | Who will obtain informed consent or assent from potential trial       | 7      |
| 50 |                            |                      | participants or authorised surrogates, and how (see Item 32)          |        |
| 51 |                            |                      |                                                                       |        |
| 52 |                            |                      |                                                                       |        |
| 53 | Consent or assent:         | <a href="#">#26b</a> | Additional consent provisions for collection and use of participant   | N/A    |
| 54 | ancillary studies          |                      | data and biological specimens in ancillary studies, if applicable     |        |
| 55 |                            |                      |                                                                       |        |
| 56 |                            |                      |                                                                       |        |
| 57 | Confidentiality            | <a href="#">#27</a>  | How personal information about potential and enrolled participants    | 8      |
| 58 |                            |                      | will be collected, shared, and maintained in order to protect         |        |
| 59 |                            |                      |                                                                       |        |
| 60 |                            |                      |                                                                       |        |

confidentiality before, during, and after the trial

|    |                          |                      |                                                                       |
|----|--------------------------|----------------------|-----------------------------------------------------------------------|
| 1  |                          |                      |                                                                       |
| 2  |                          |                      |                                                                       |
| 3  | Declaration of interests | <a href="#">#28</a>  | Financial and other competing interests for principal investigators   |
| 4  |                          |                      | for the overall trial and each study site                             |
| 5  |                          |                      |                                                                       |
| 6  | Data access              | <a href="#">#29</a>  | Statement of who will have access to the final trial dataset, and     |
| 7  |                          |                      | disclosure of contractual agreements that limit such access for       |
| 8  |                          |                      | investigators                                                         |
| 9  |                          |                      |                                                                       |
| 10 |                          |                      |                                                                       |
| 11 | Ancillary and post trial | <a href="#">#30</a>  | Provisions, if any, for ancillary and post-trial care, and for        |
| 12 | care                     |                      | compensation to those who suffer harm from trial participation        |
| 13 |                          |                      |                                                                       |
| 14 |                          |                      |                                                                       |
| 15 | Dissemination policy:    | <a href="#">#31a</a> | Plans for investigators and sponsor to communicate trial results to   |
| 16 | trial results            |                      | participants, healthcare professionals, the public, and other         |
| 17 |                          |                      | relevant groups (eg, via publication, reporting in results databases, |
| 18 |                          |                      | or other data sharing arrangements), including any publication        |
| 19 |                          |                      | restrictions                                                          |
| 20 |                          |                      |                                                                       |
| 21 |                          |                      |                                                                       |
| 22 |                          |                      |                                                                       |
| 23 | Dissemination policy:    | <a href="#">#31b</a> | Authorship eligibility guidelines and any intended use of             |
| 24 | authorship               |                      | professional writers                                                  |
| 25 |                          |                      |                                                                       |
| 26 |                          |                      |                                                                       |
| 27 | Dissemination policy:    | <a href="#">#31c</a> | Plans, if any, for granting public access to the full protocol,       |
| 28 | reproducible research    |                      | participant-level dataset, and statistical code                       |
| 29 |                          |                      |                                                                       |
| 30 |                          |                      |                                                                       |

## 31 Appendices

|    |                      |                     |                                                                      |
|----|----------------------|---------------------|----------------------------------------------------------------------|
| 32 |                      |                     |                                                                      |
| 33 |                      |                     |                                                                      |
| 34 | Informed consent     | <a href="#">#32</a> | Model consent form and other related documentation given to          |
| 35 | materials            |                     | participants and authorised surrogates                               |
| 36 |                      |                     |                                                                      |
| 37 |                      |                     |                                                                      |
| 38 | Biological specimens | <a href="#">#33</a> | Plans for collection, laboratory evaluation, and storage of          |
| 39 |                      |                     | biological specimens for genetic or molecular analysis in the        |
| 40 |                      |                     | current trial and for future use in ancillary studies, if applicable |
| 41 |                      |                     |                                                                      |
| 42 |                      |                     |                                                                      |

## 43 Notes:

- 44
- 45 • 13: Table 2, Figure 1 The SPIRIT checklist is distributed under the terms of the Creative Commons
- 46 Attribution License CC-BY-ND 3.0. This checklist was completed on 21. November 2019 using
- 47 <https://www.goodreports.org/>, a tool made by the [EQUATOR Network](#) in collaboration with [Penelope.ai](#)
- 48
- 49
- 50
- 51
- 52
- 53
- 54
- 55
- 56
- 57
- 58
- 59
